# Supplementary material for: Telomerase-independent survival leads to a mosaic of complex subtelomere rearrangements in Chlamydomonas reinhardtii
Source: HighWire-hosted journal article supplement (doi:10.1101/gr.278043.123), 2023-08-14

**Supplemental Dataset 1. *Spacer*-based analysis of subtelomeres.** All *Spacer*-containing reads anchored at the *Spacer* element are depicted for each subtelomere for CC-4533, *tel-m1-0*, *tel-m1-1* and *tel-m2-1*. The queried elements are displayed in color. The identifier for each read (“Read\_id”) is also shown, to facilitate retrieval from the sequencing data.

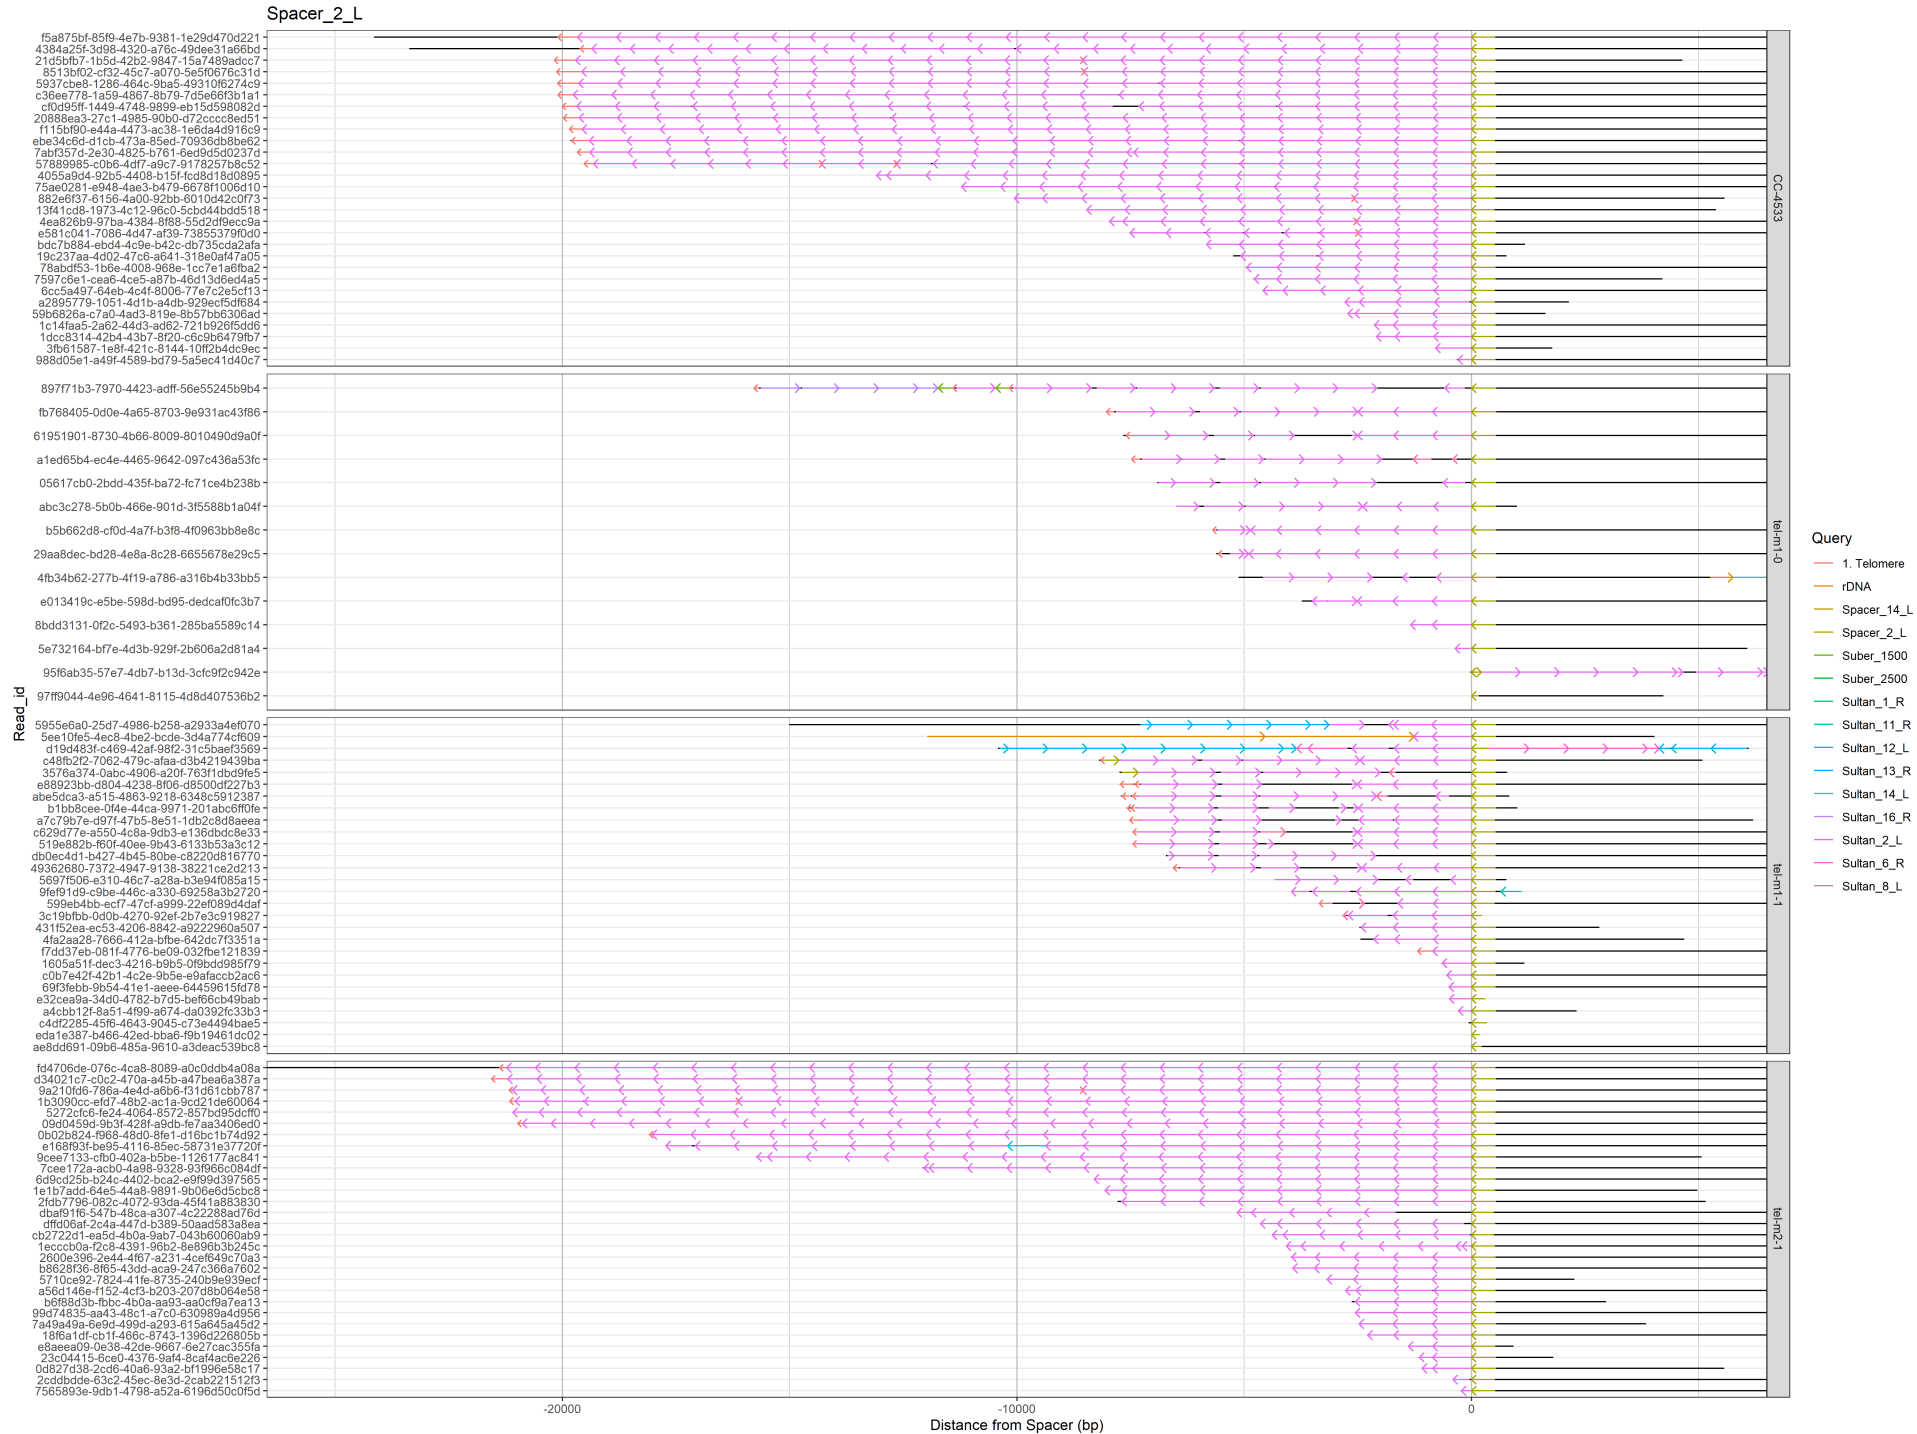

Spacer\_2\_R

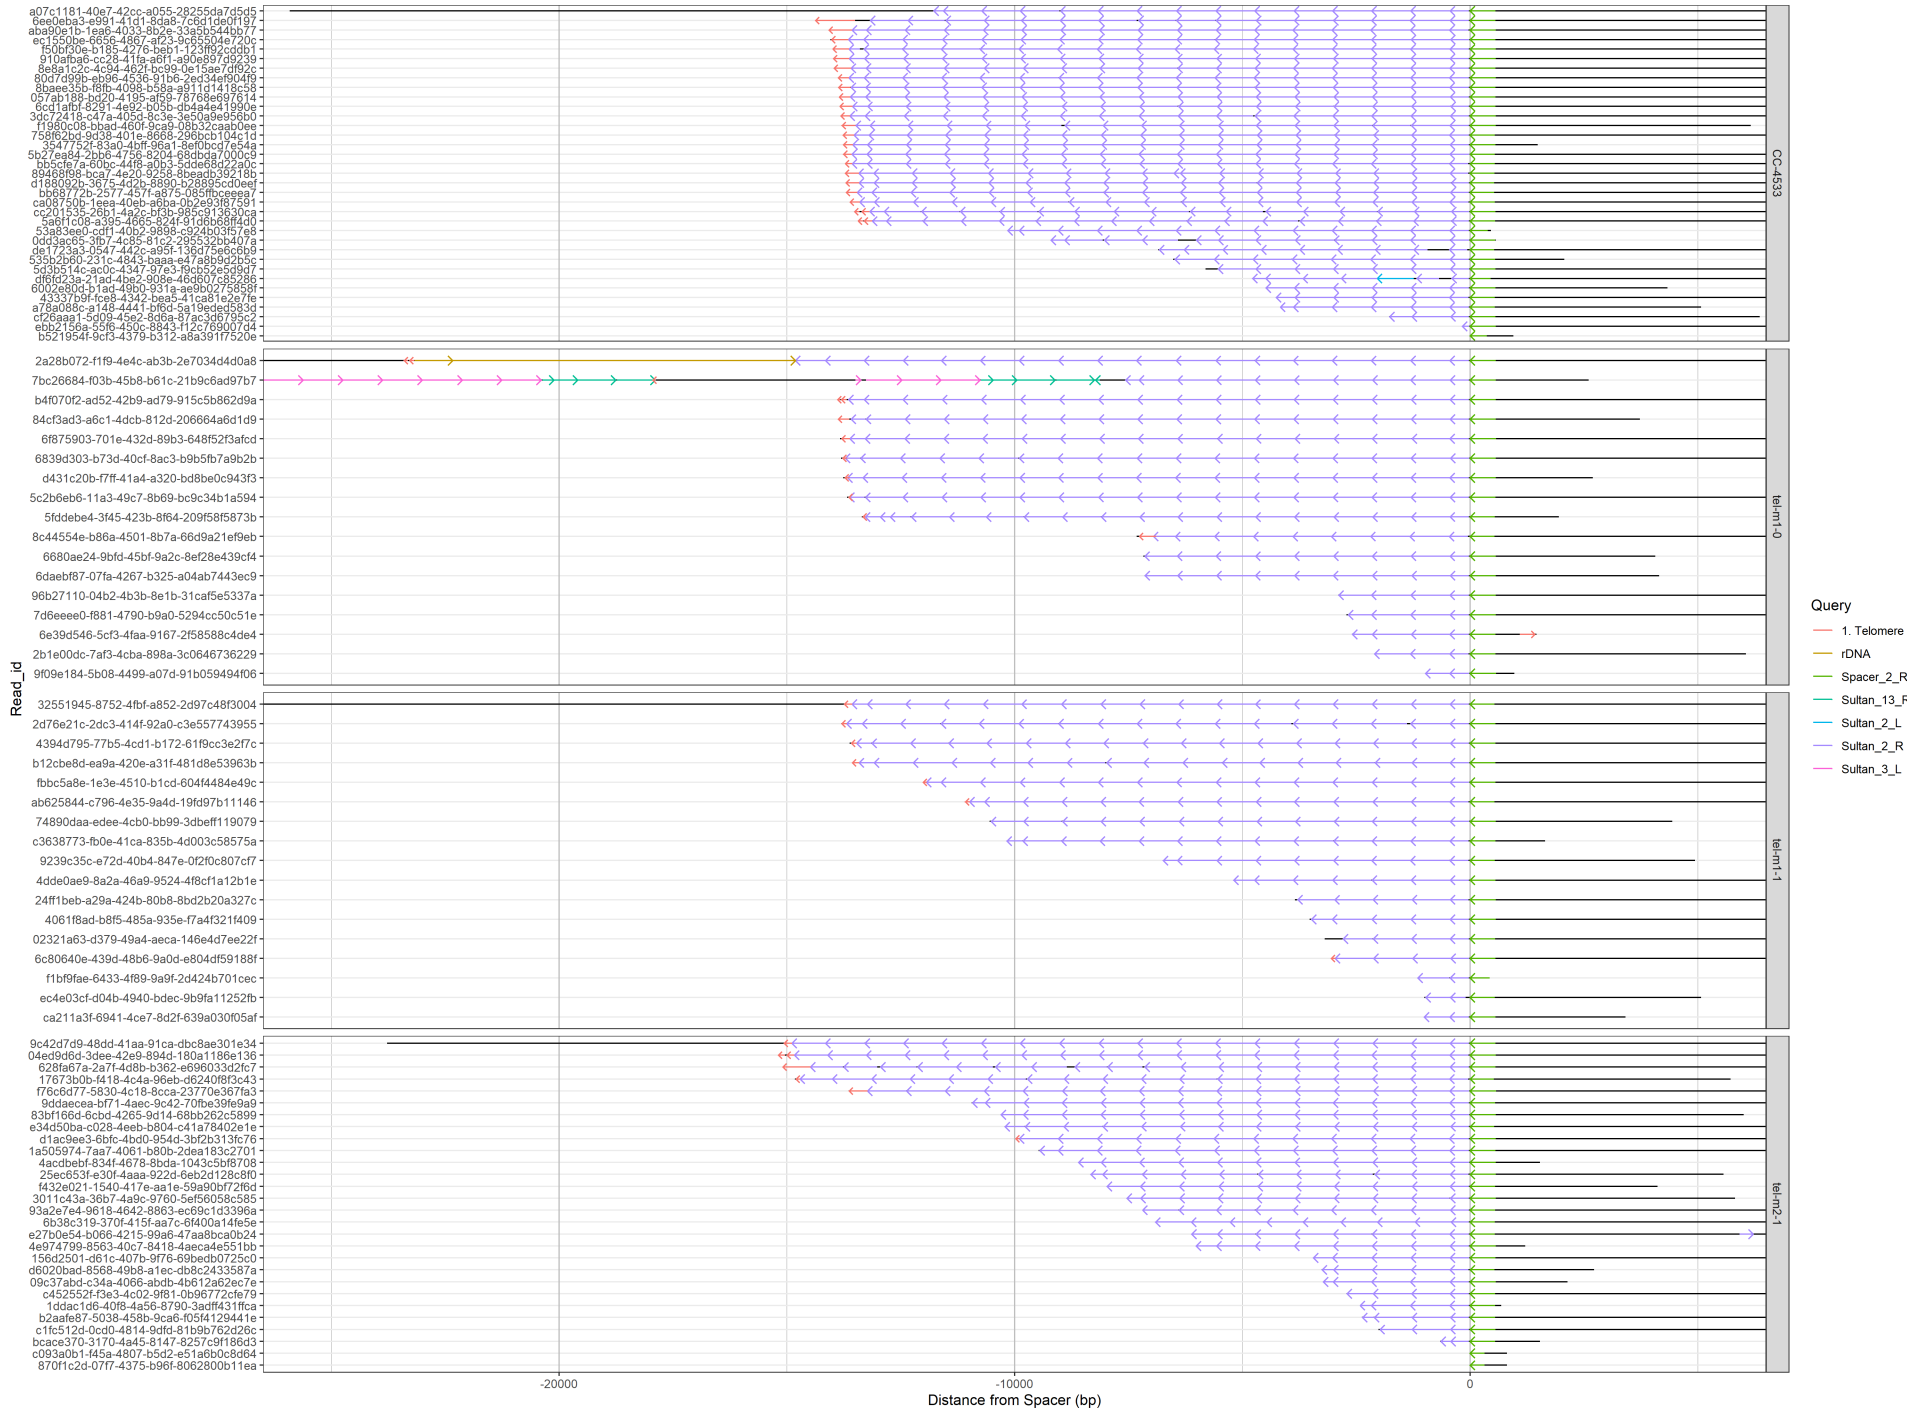

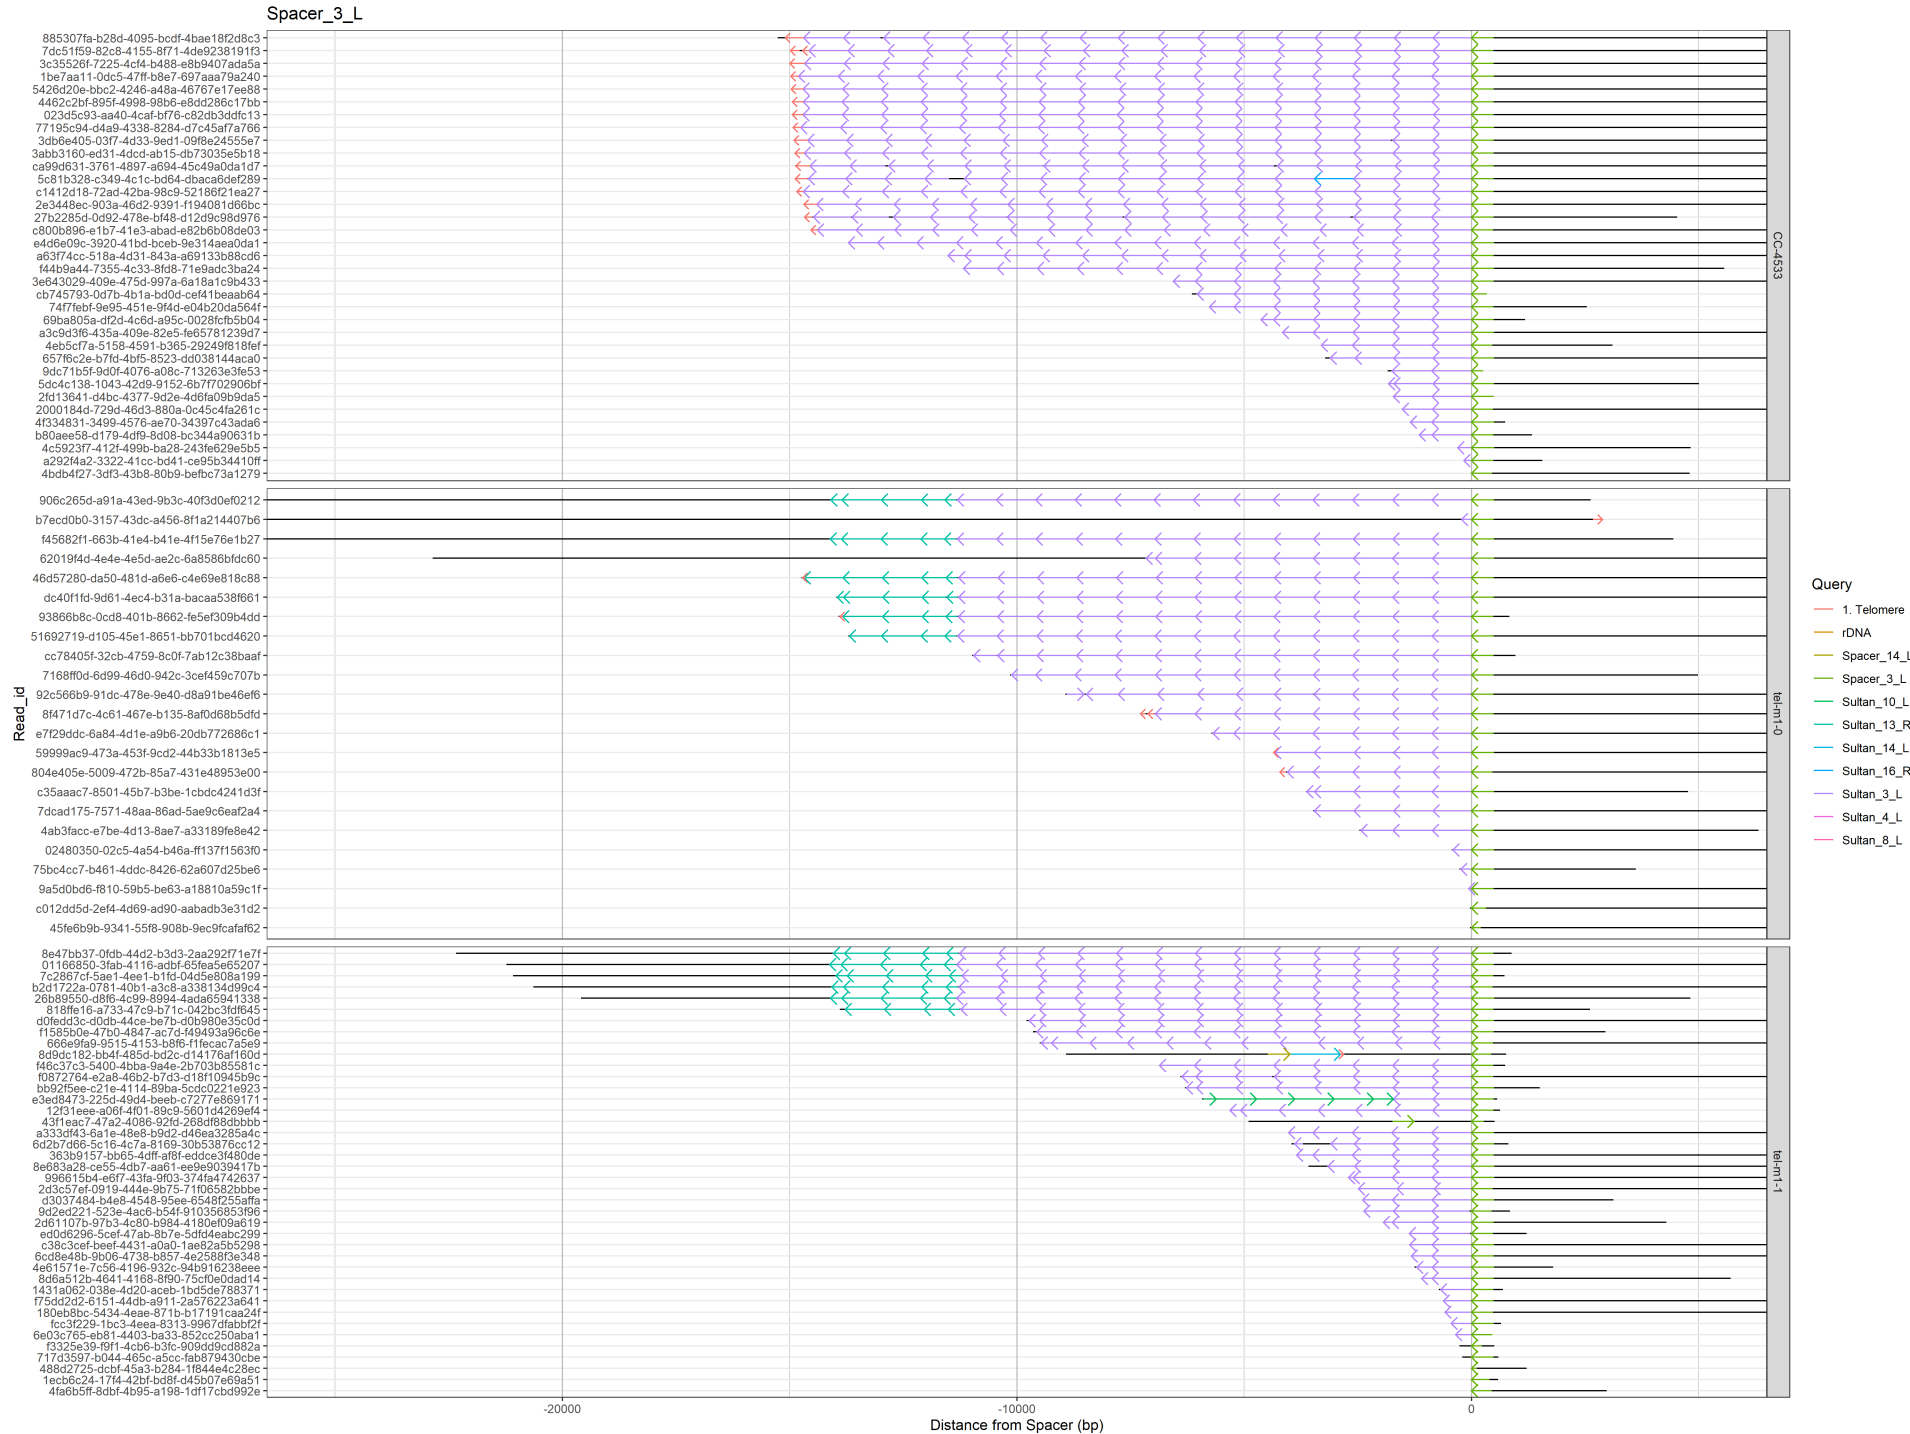



Spacer\_3\_R

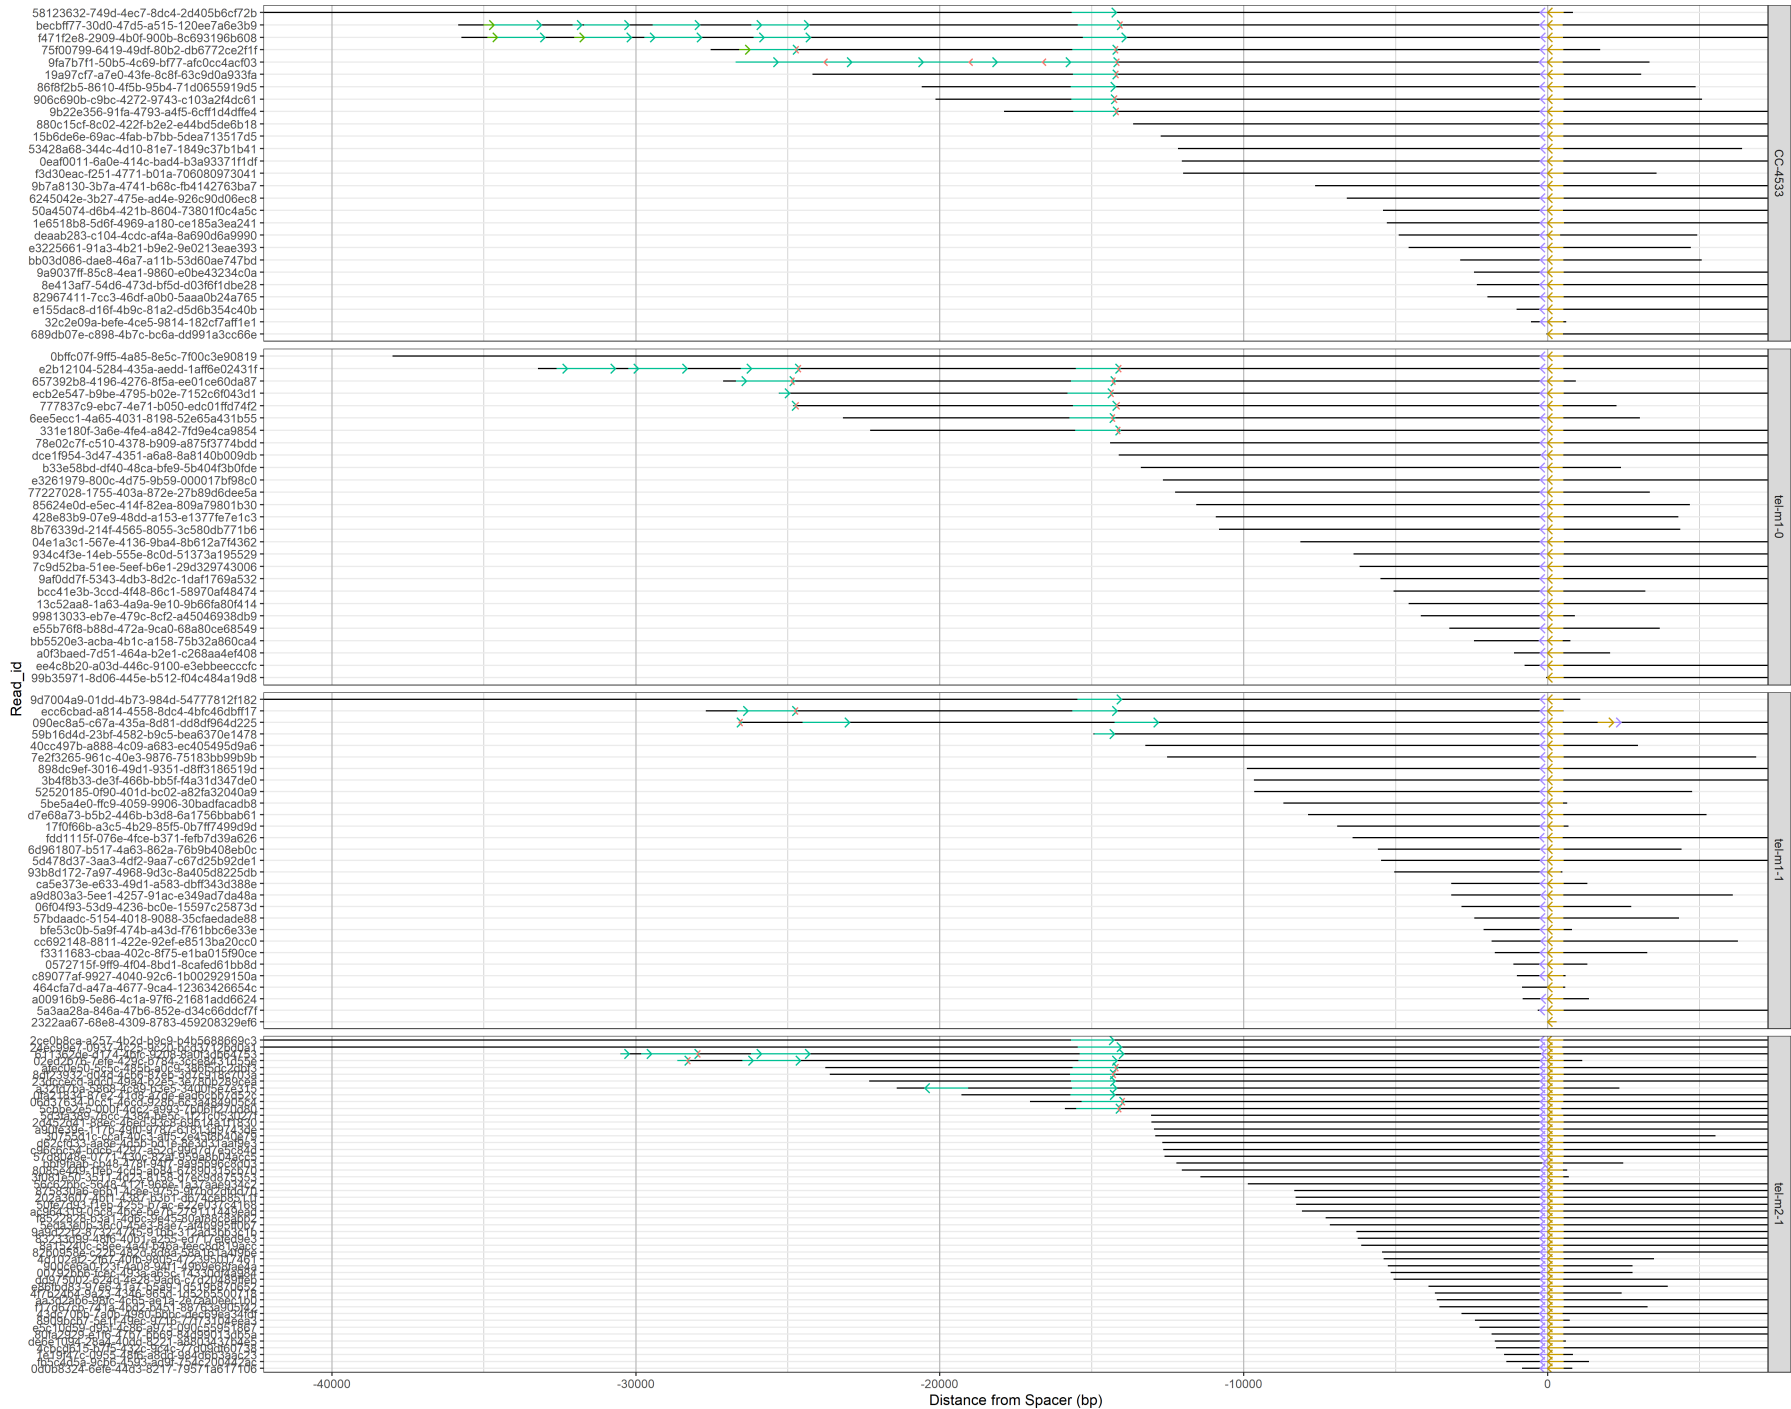

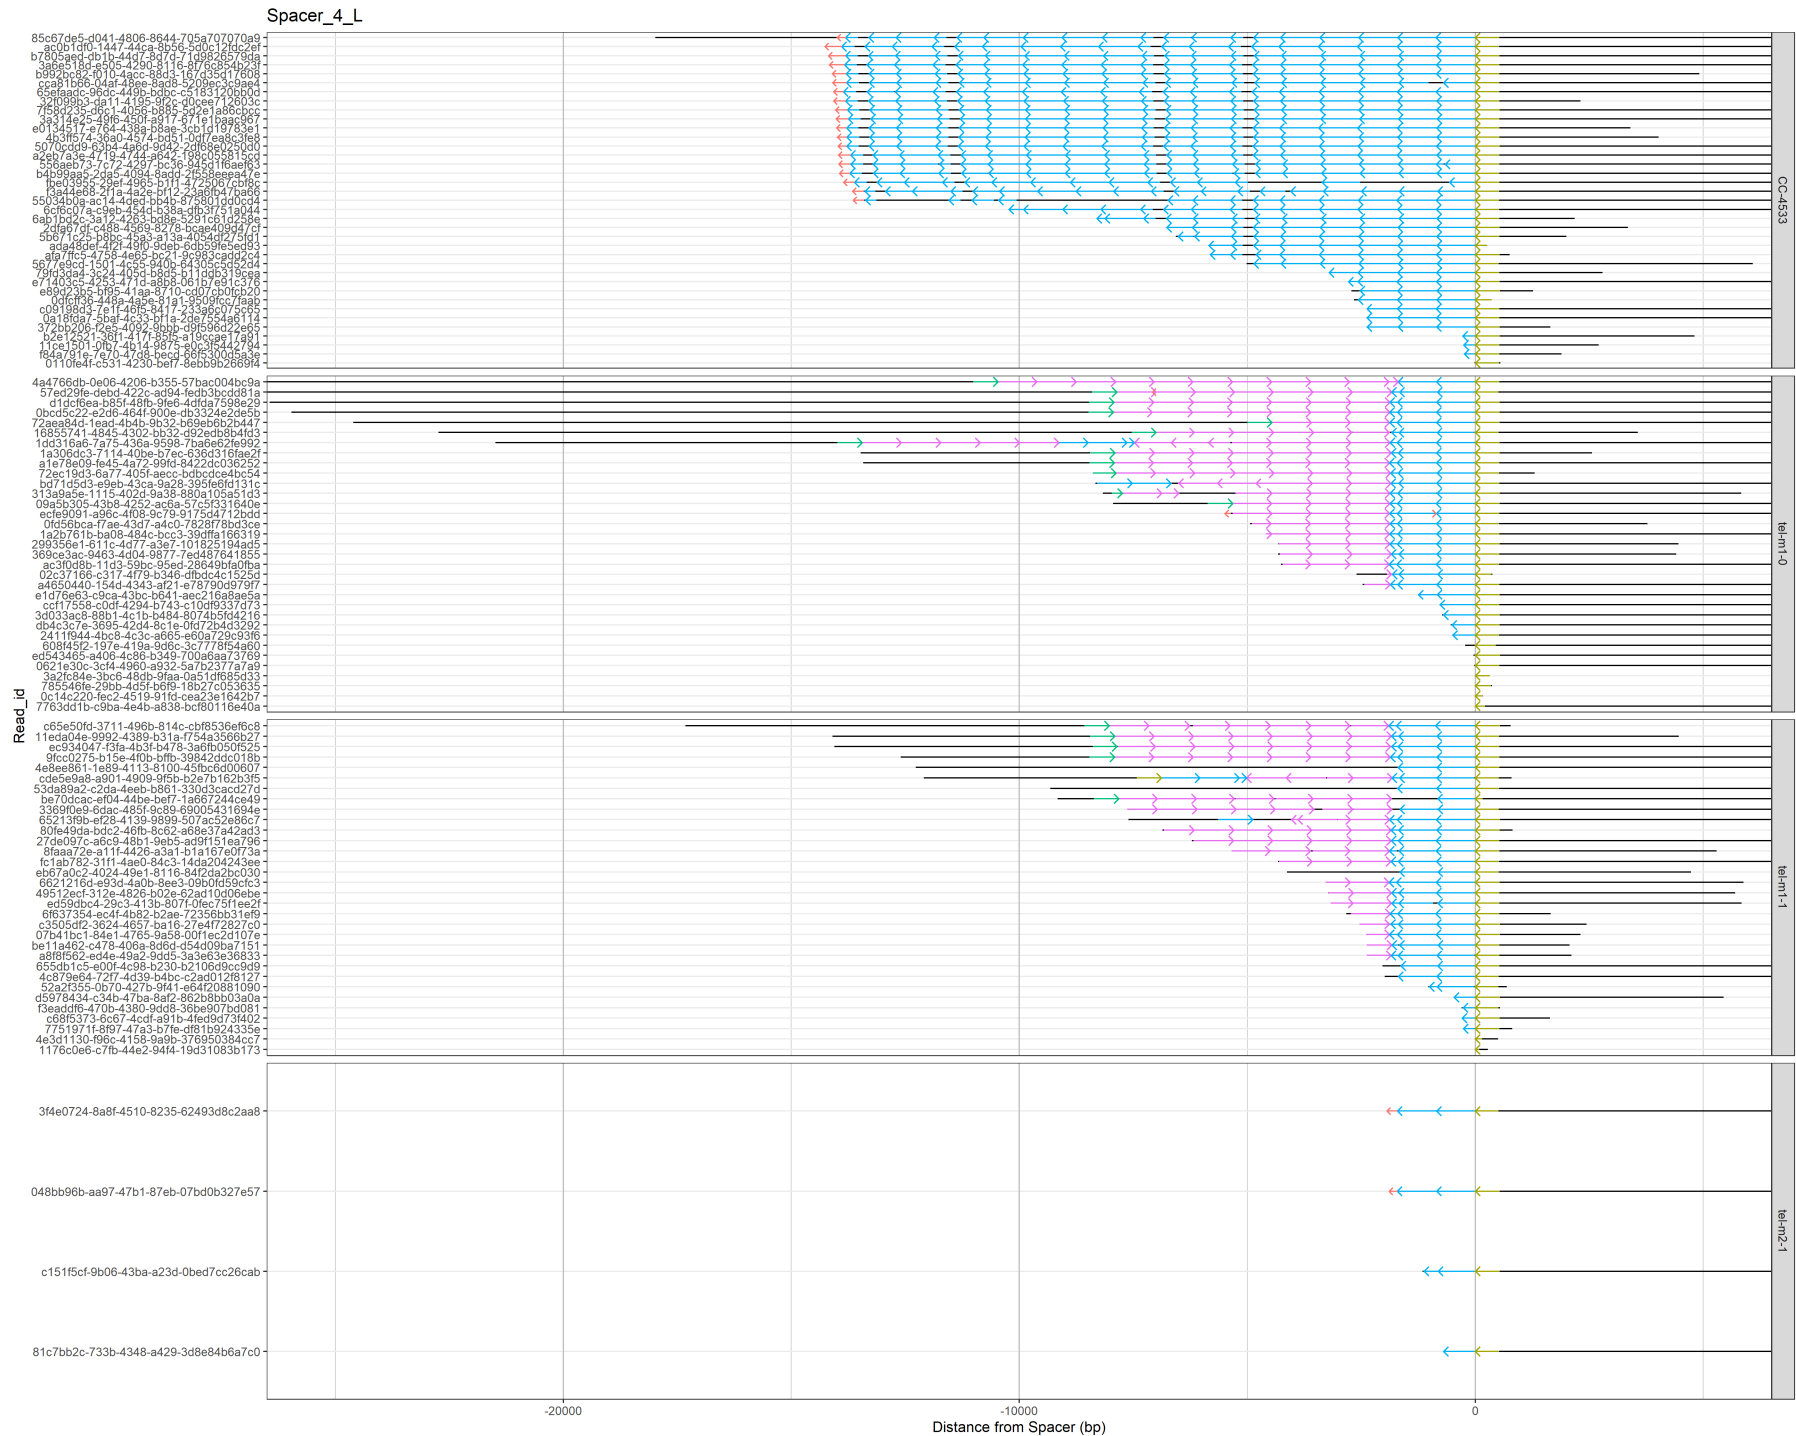

Spacer\_4\_R

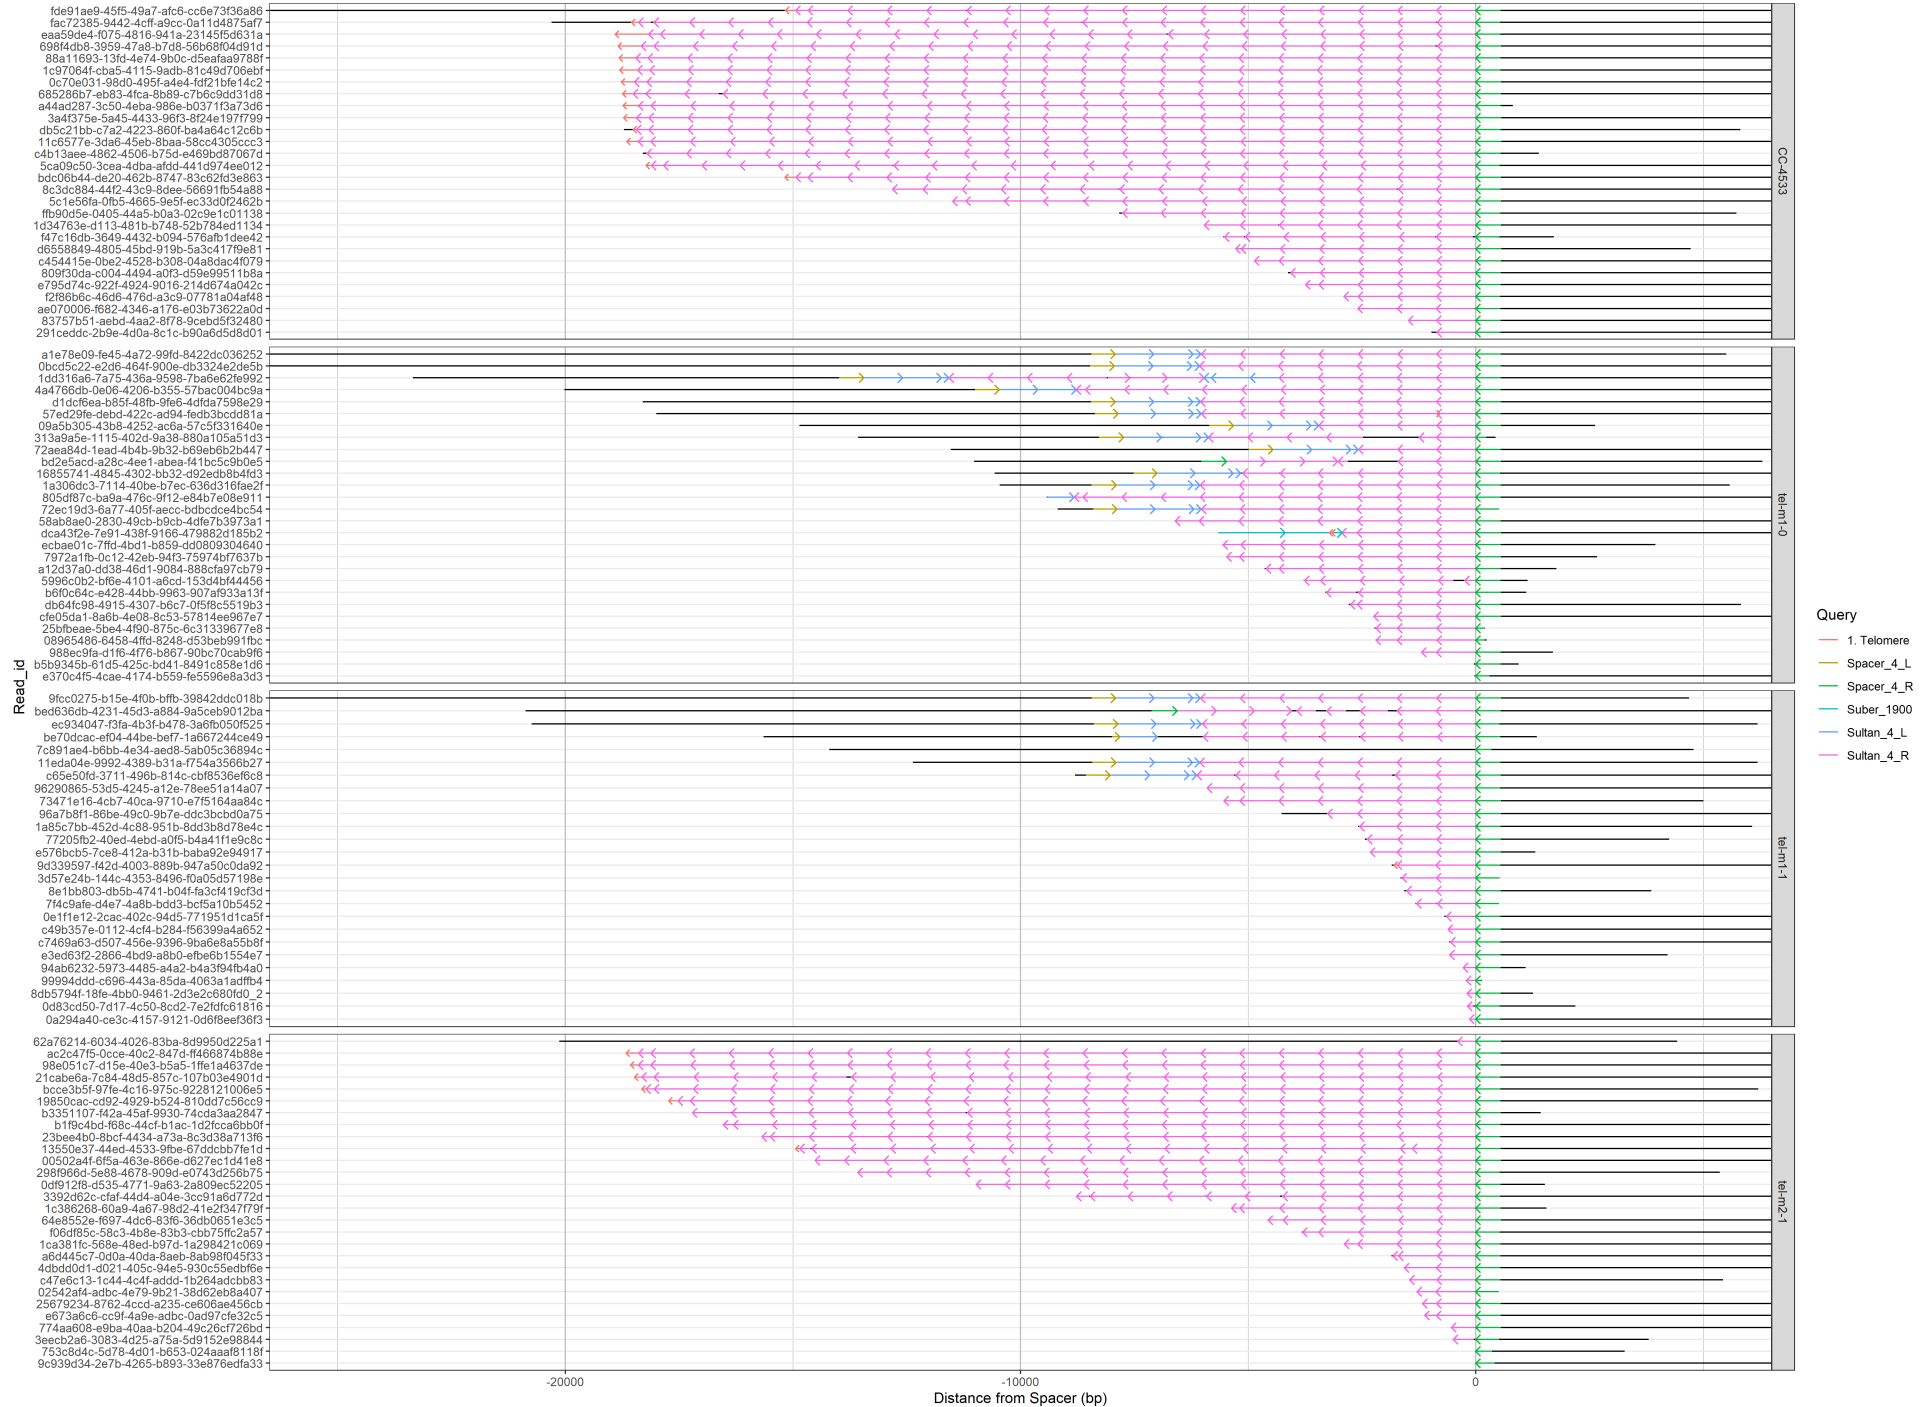

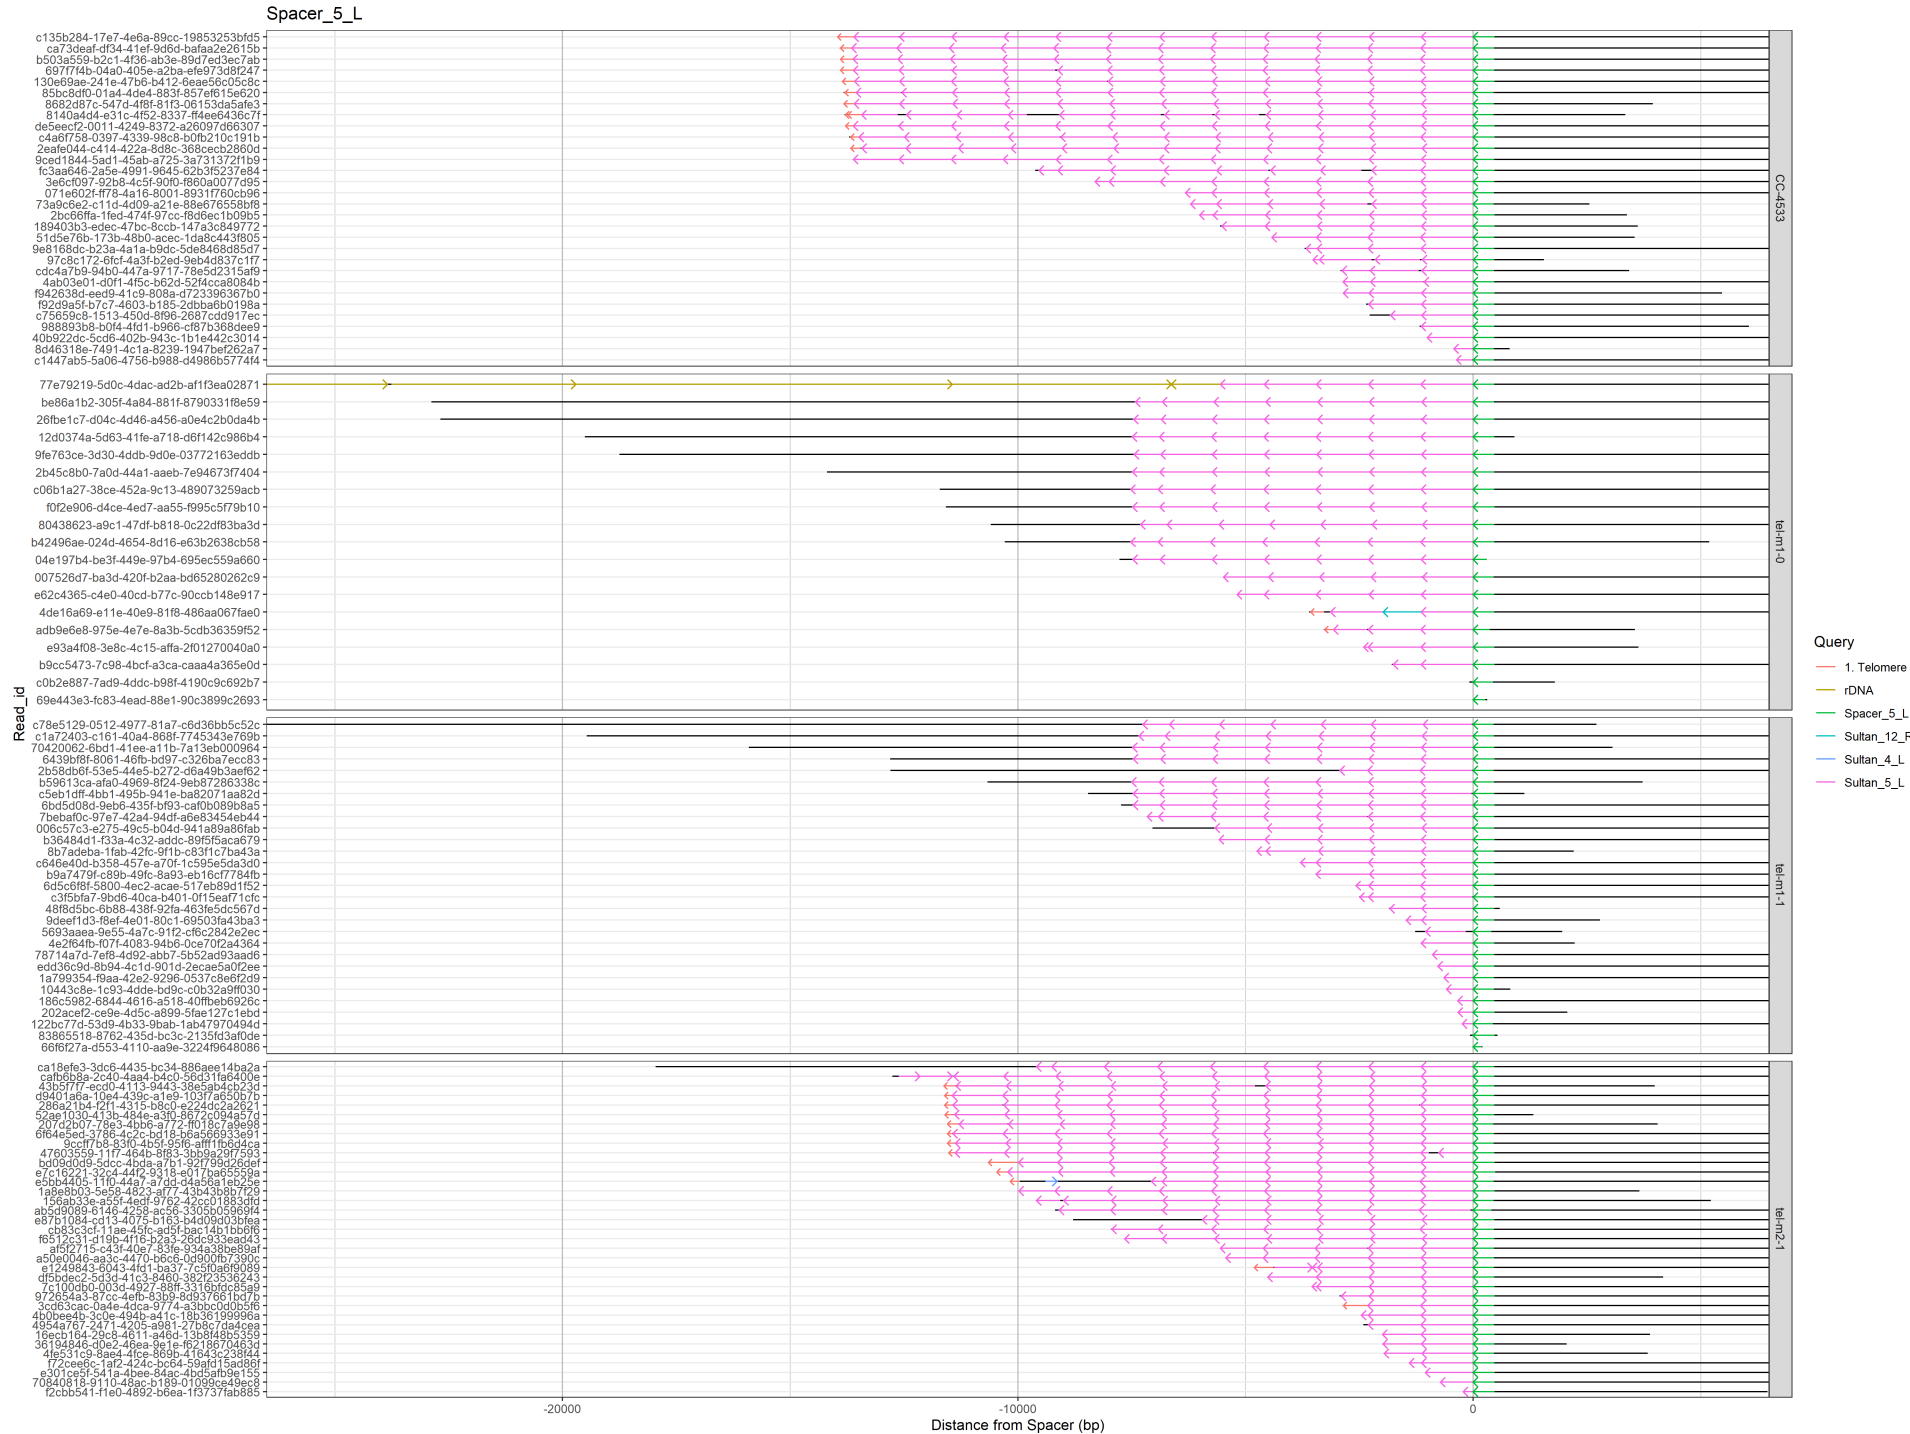

Spacer\_6\_L

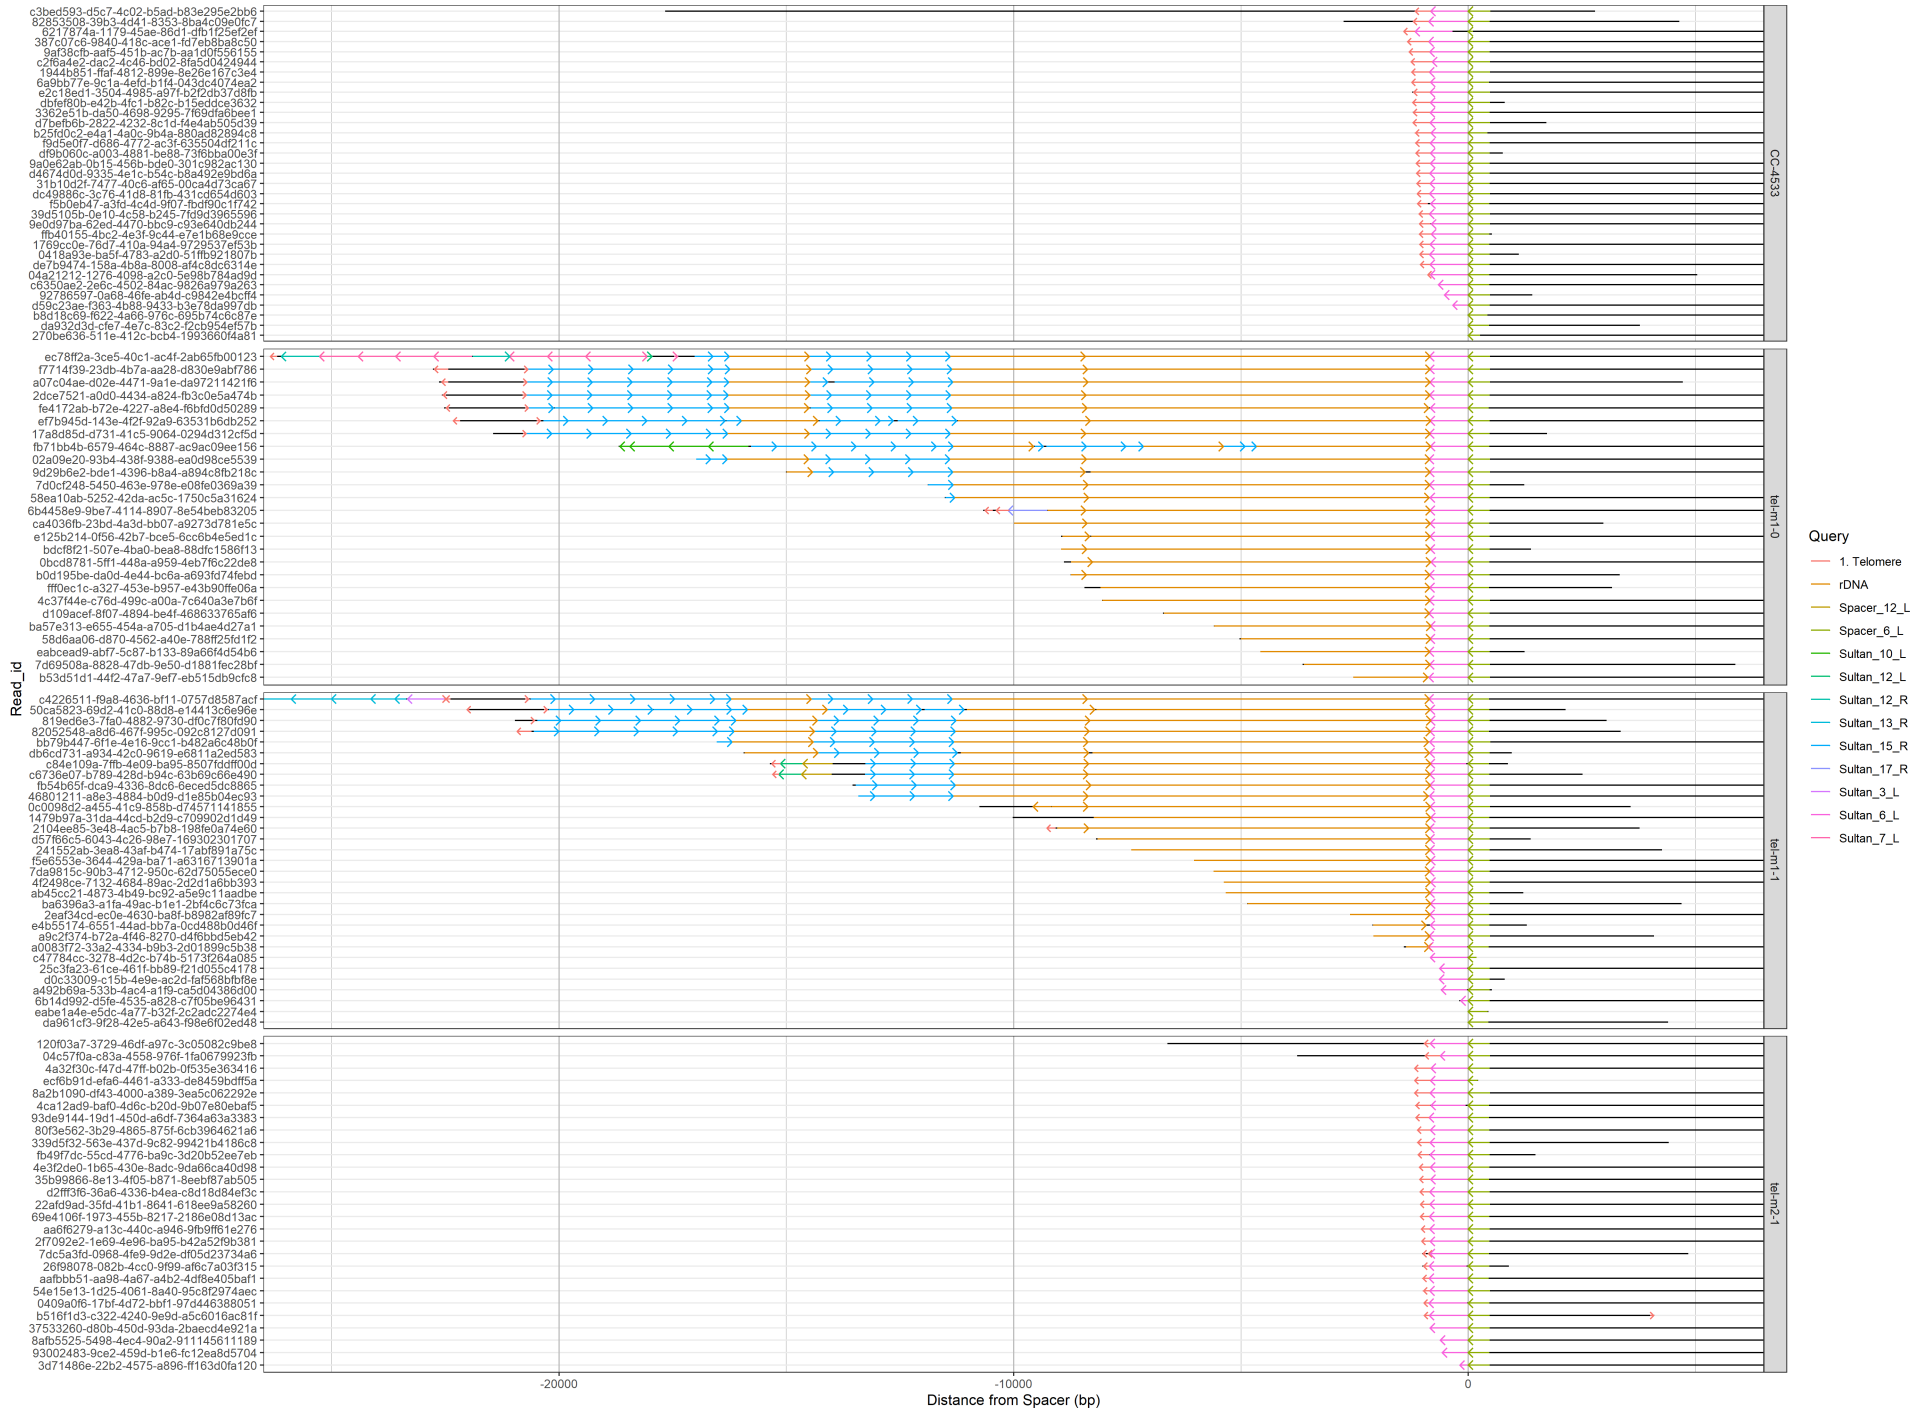



Spacer\_6\_R

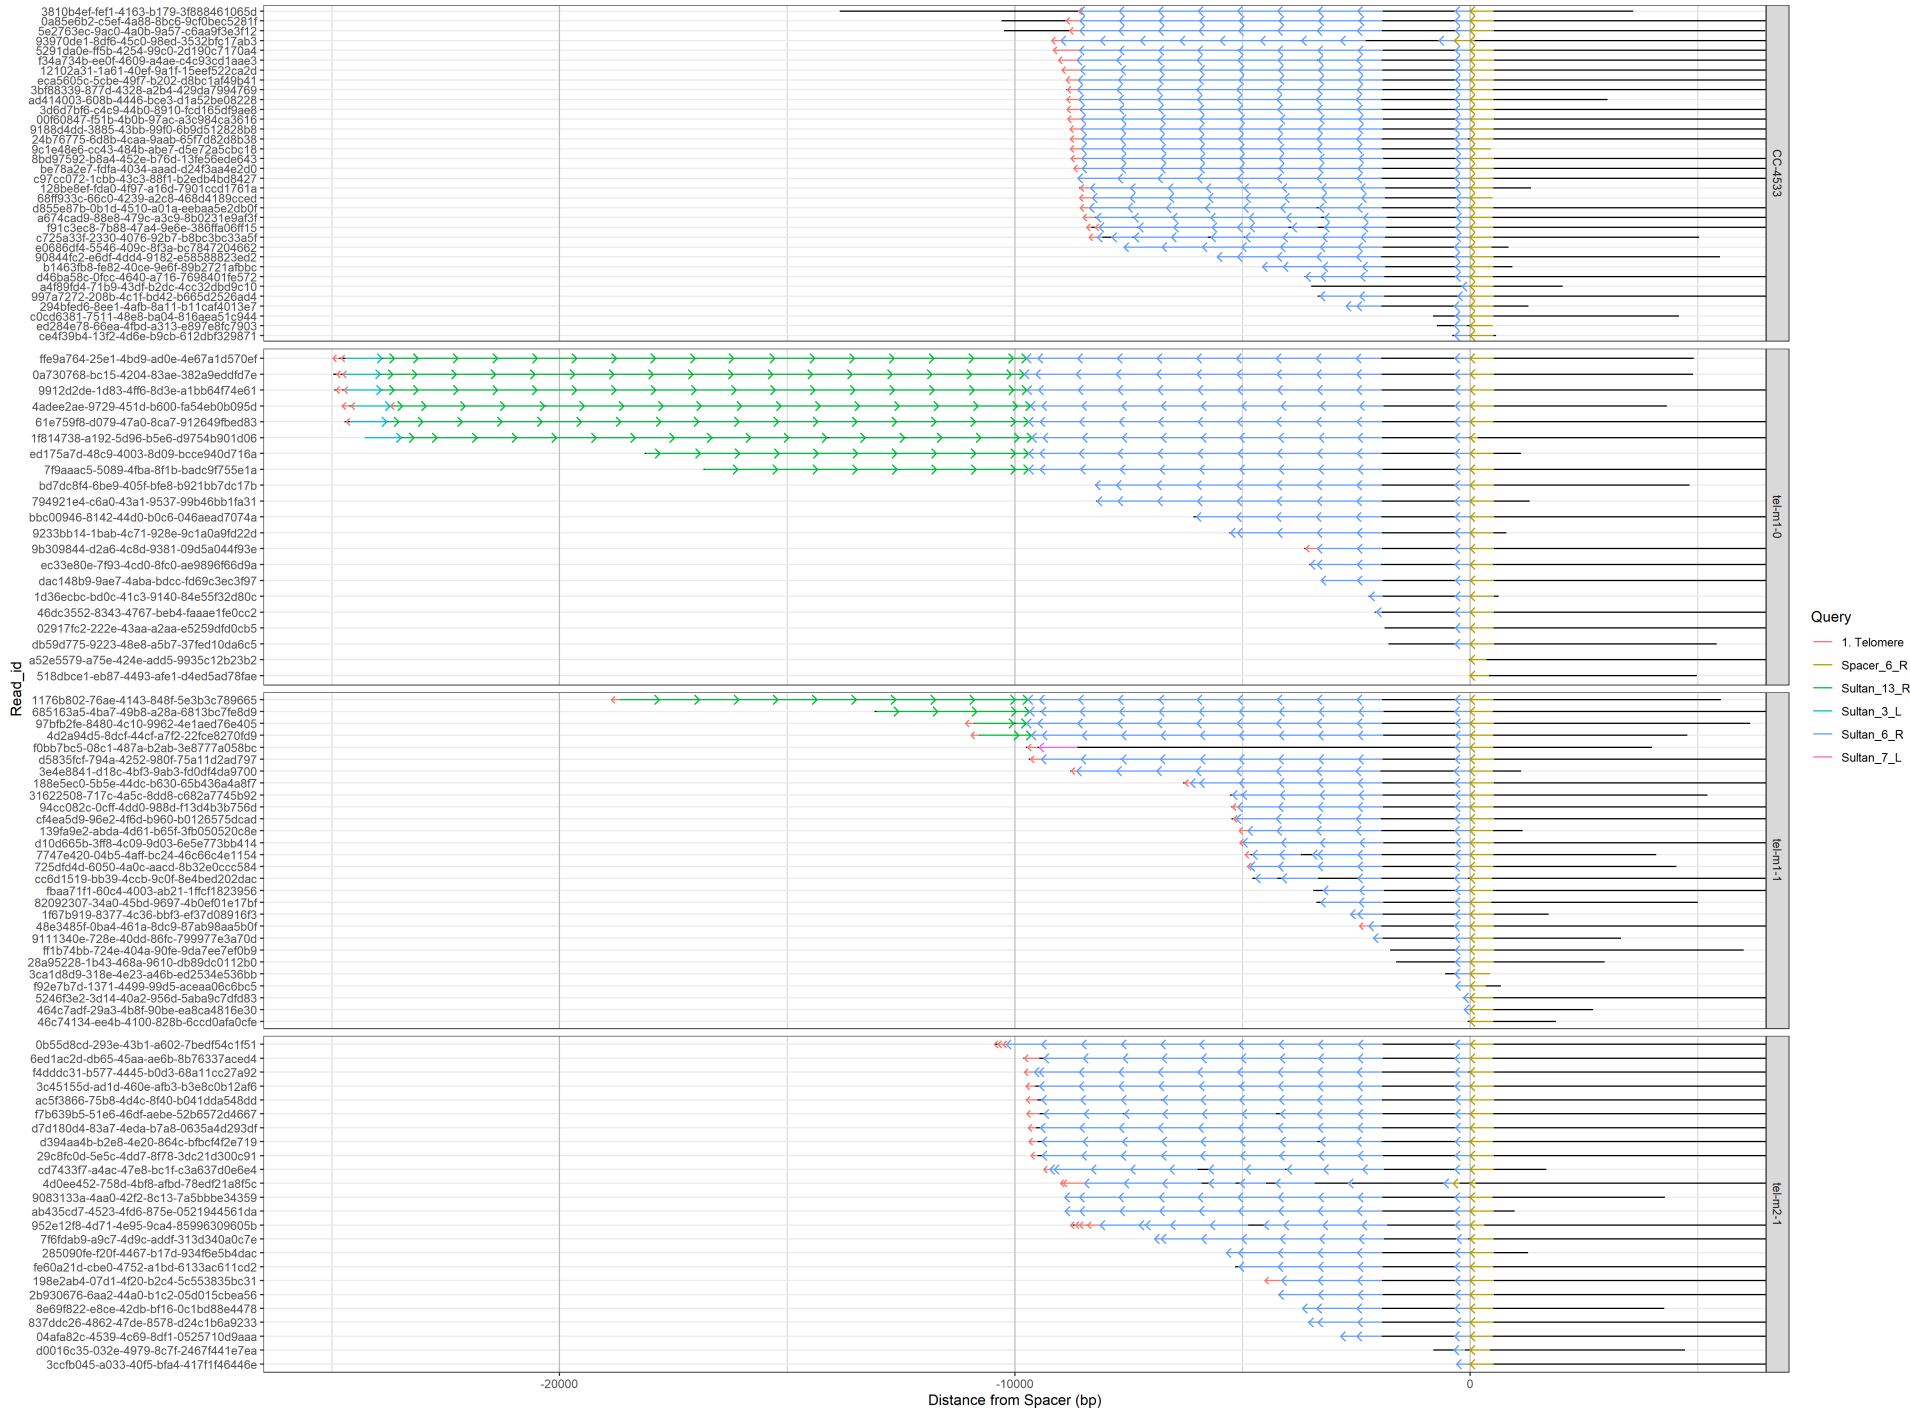

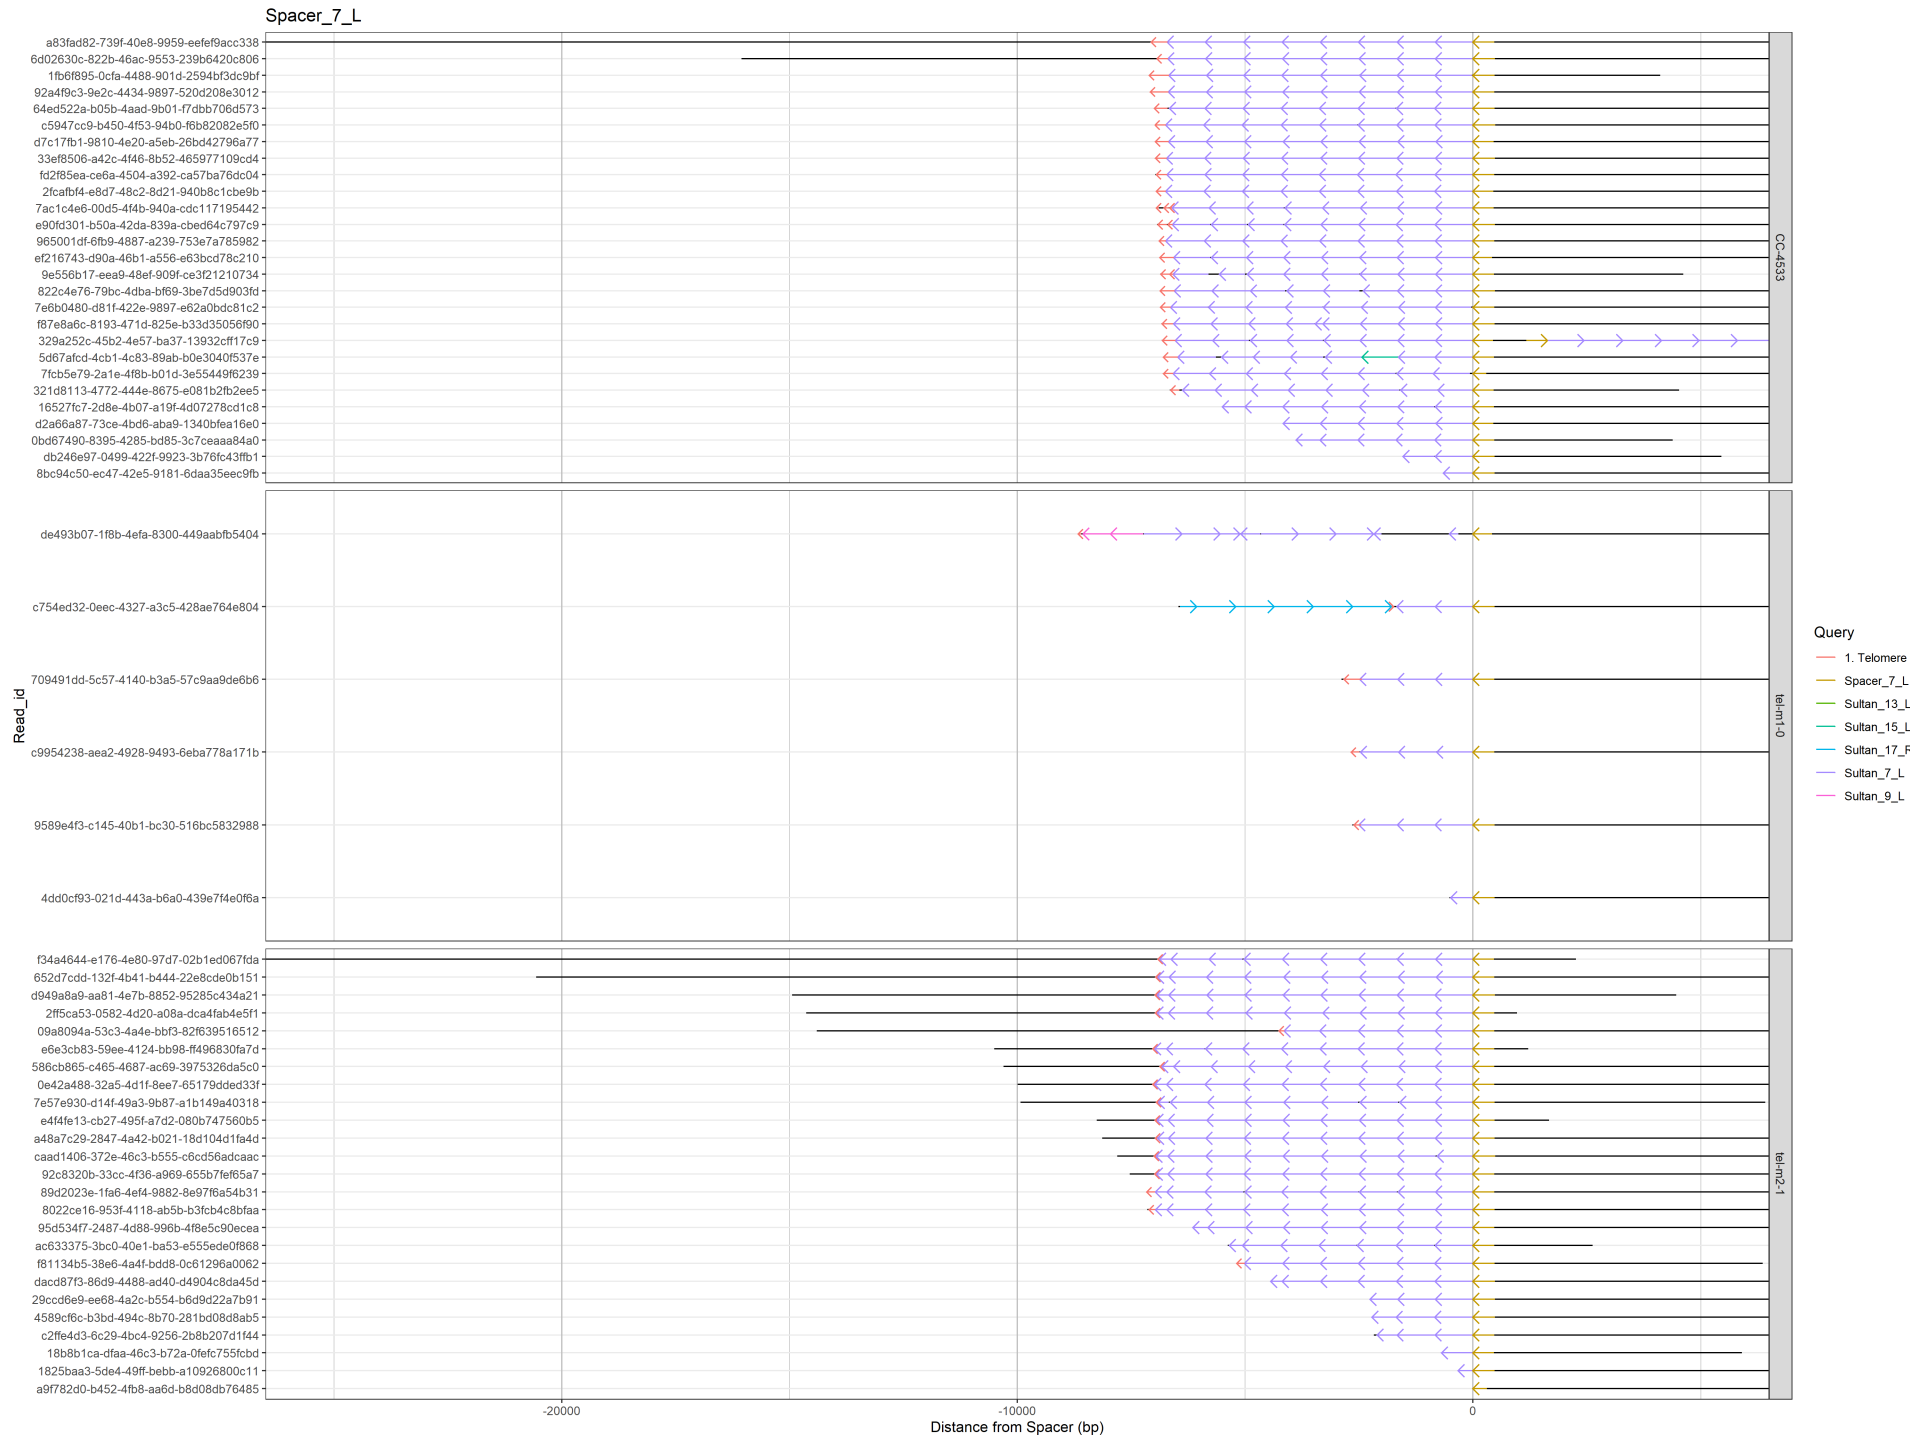



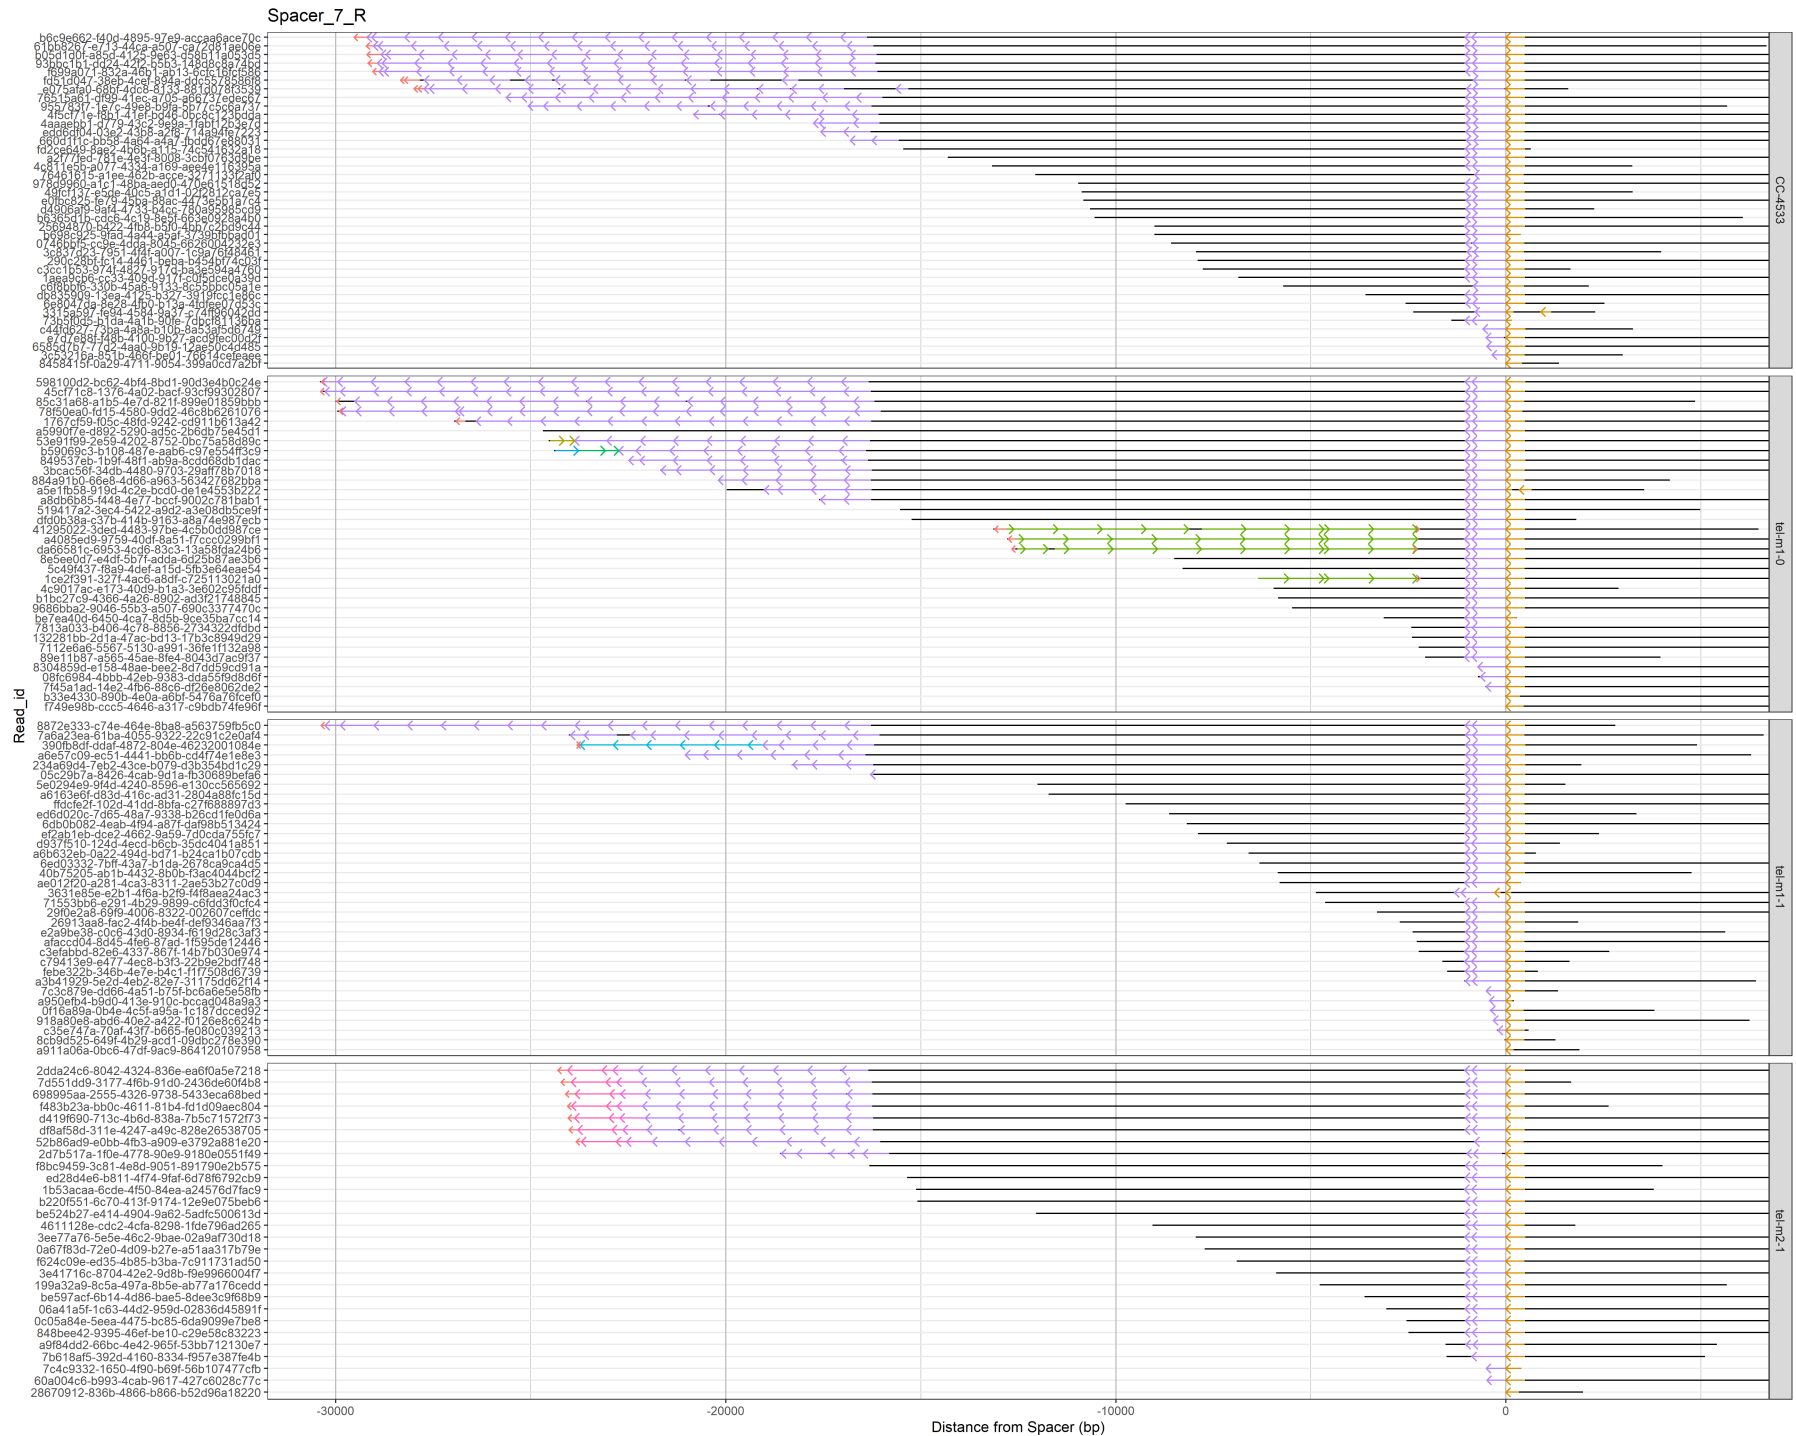

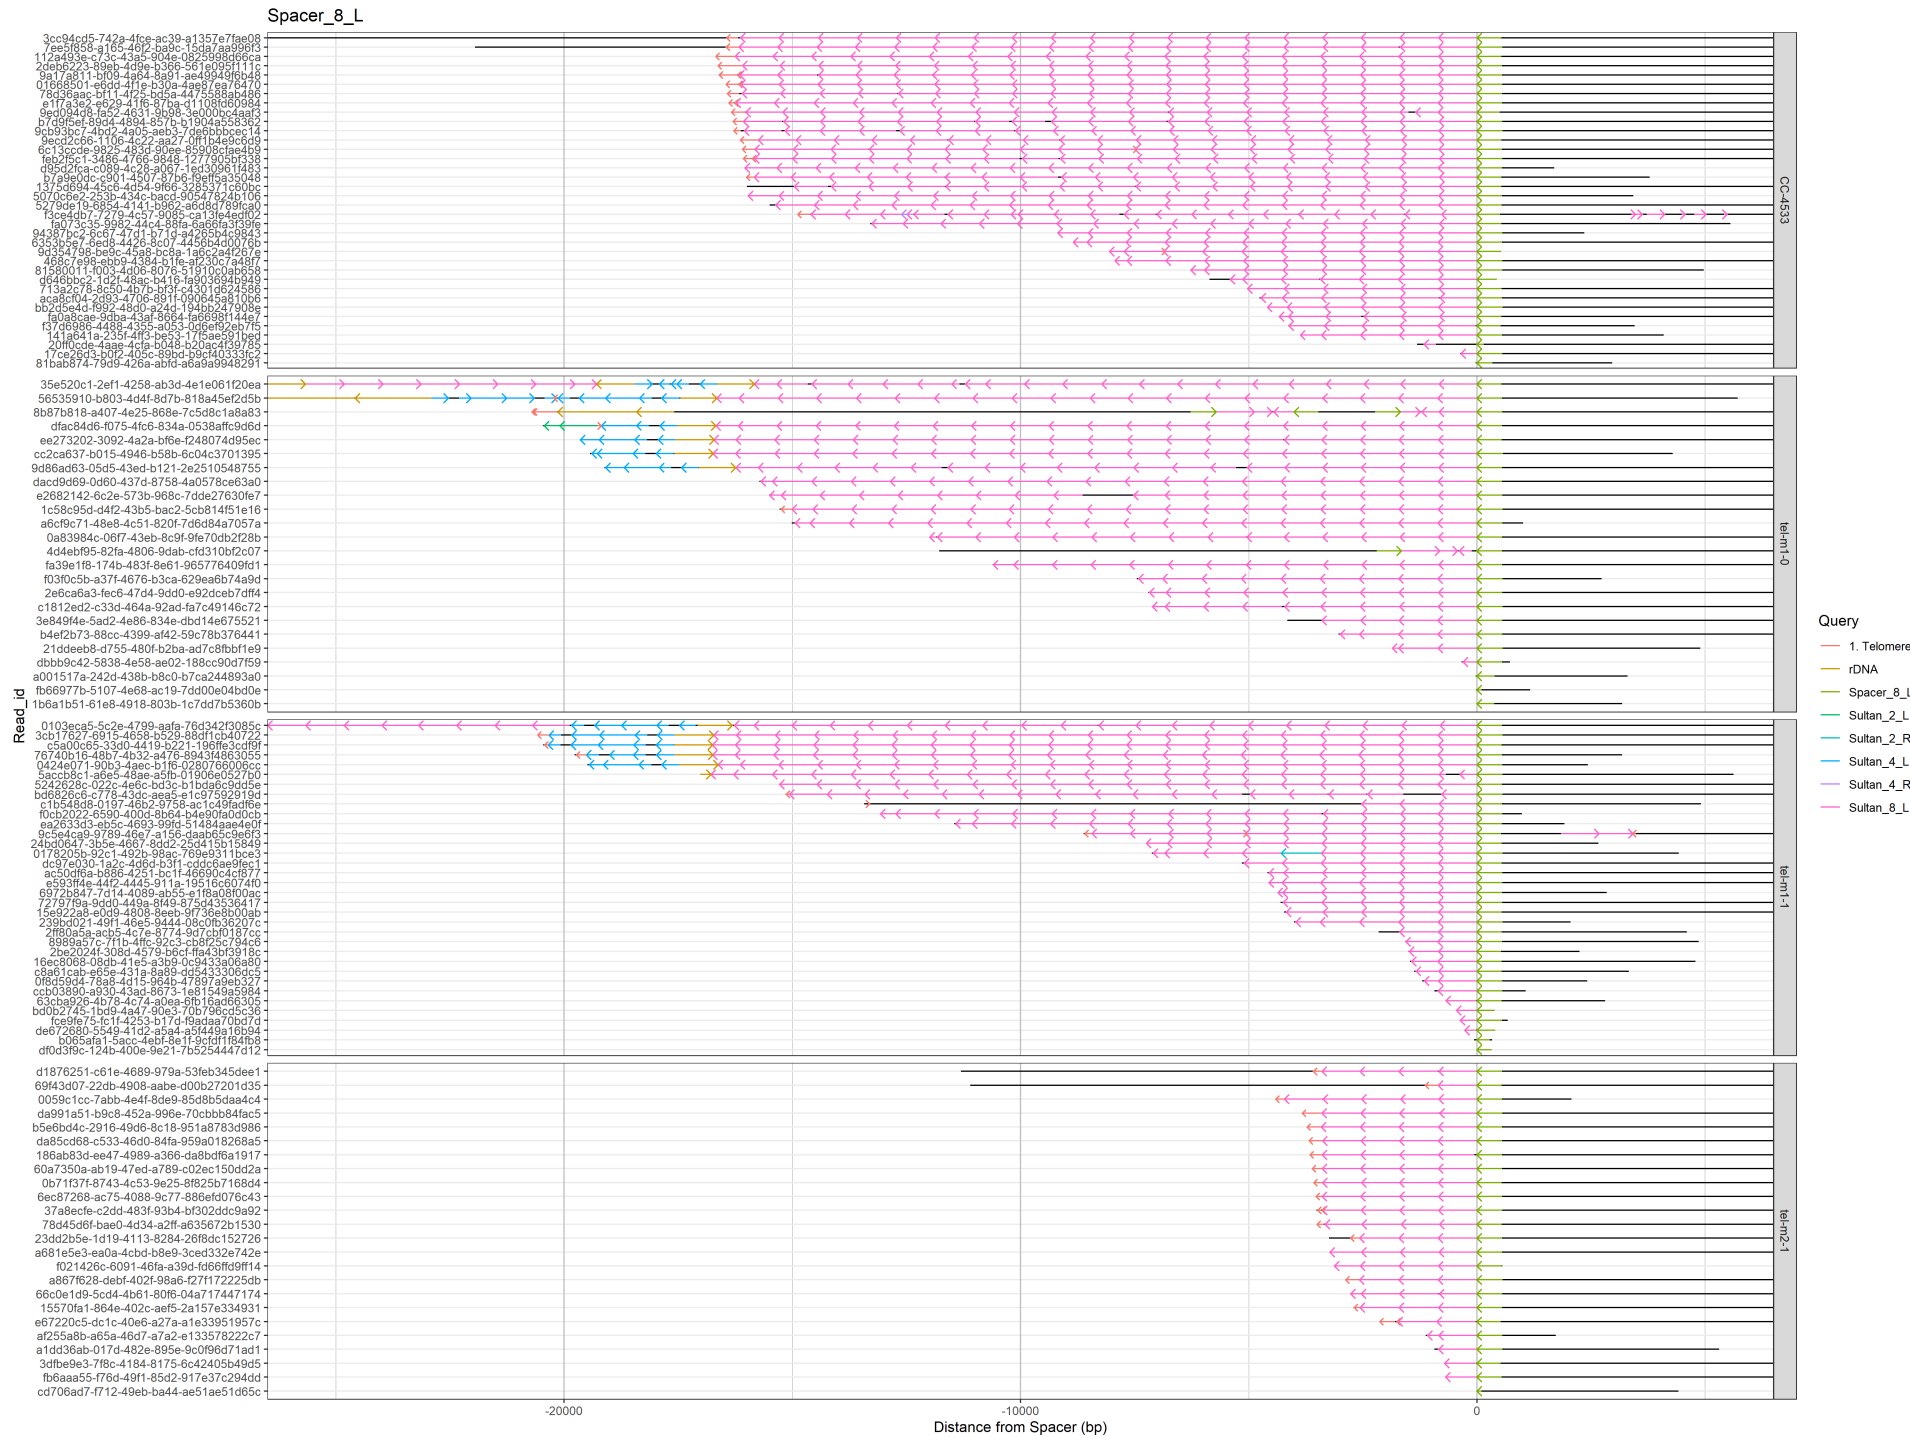

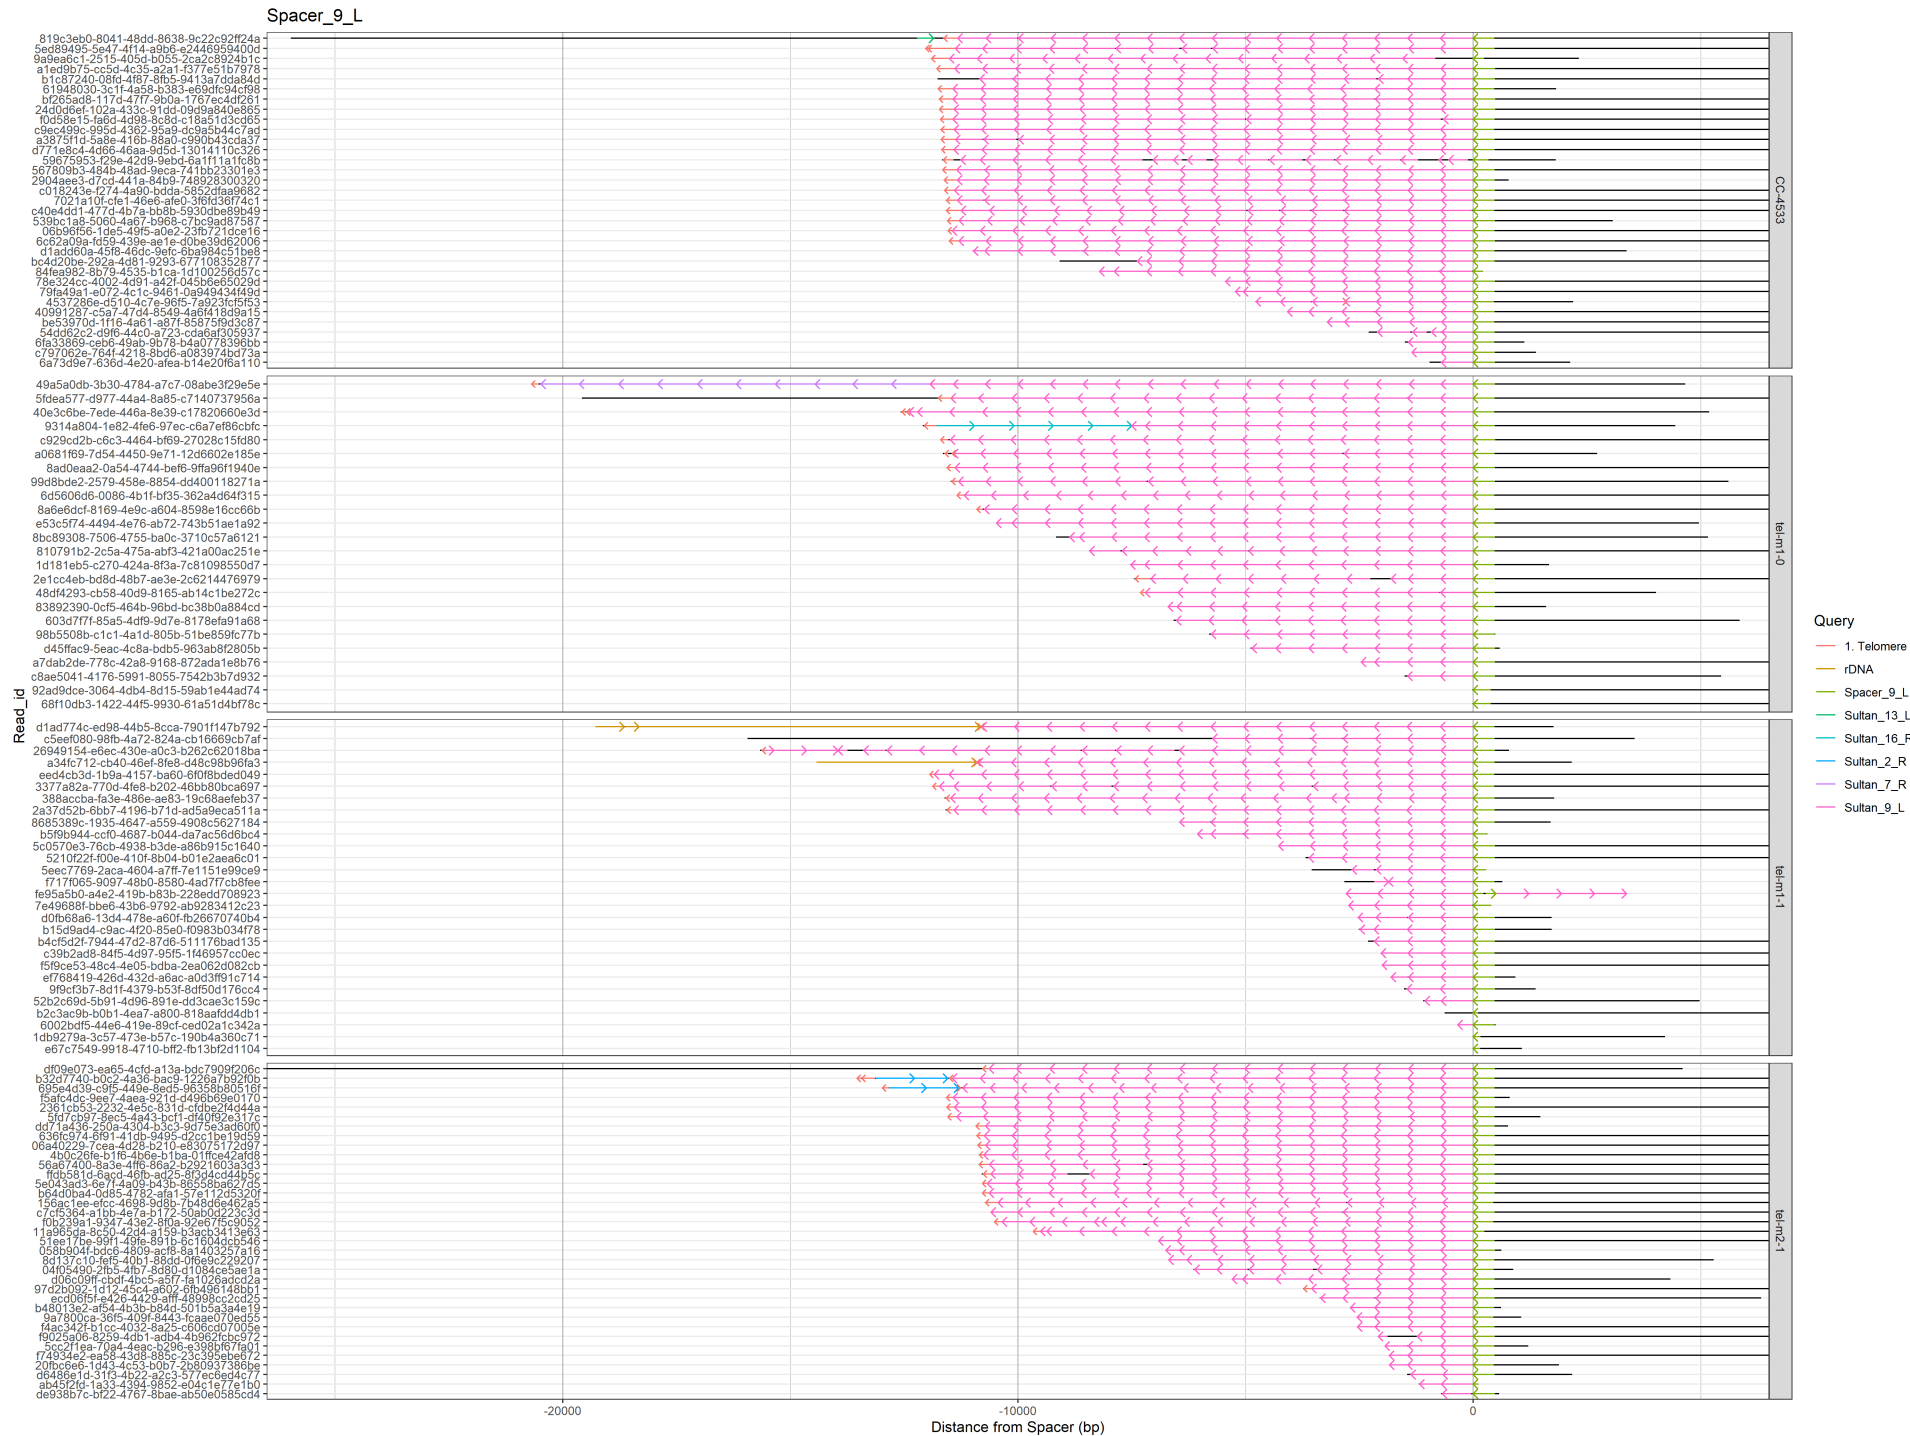

# Spacer\_9\_R

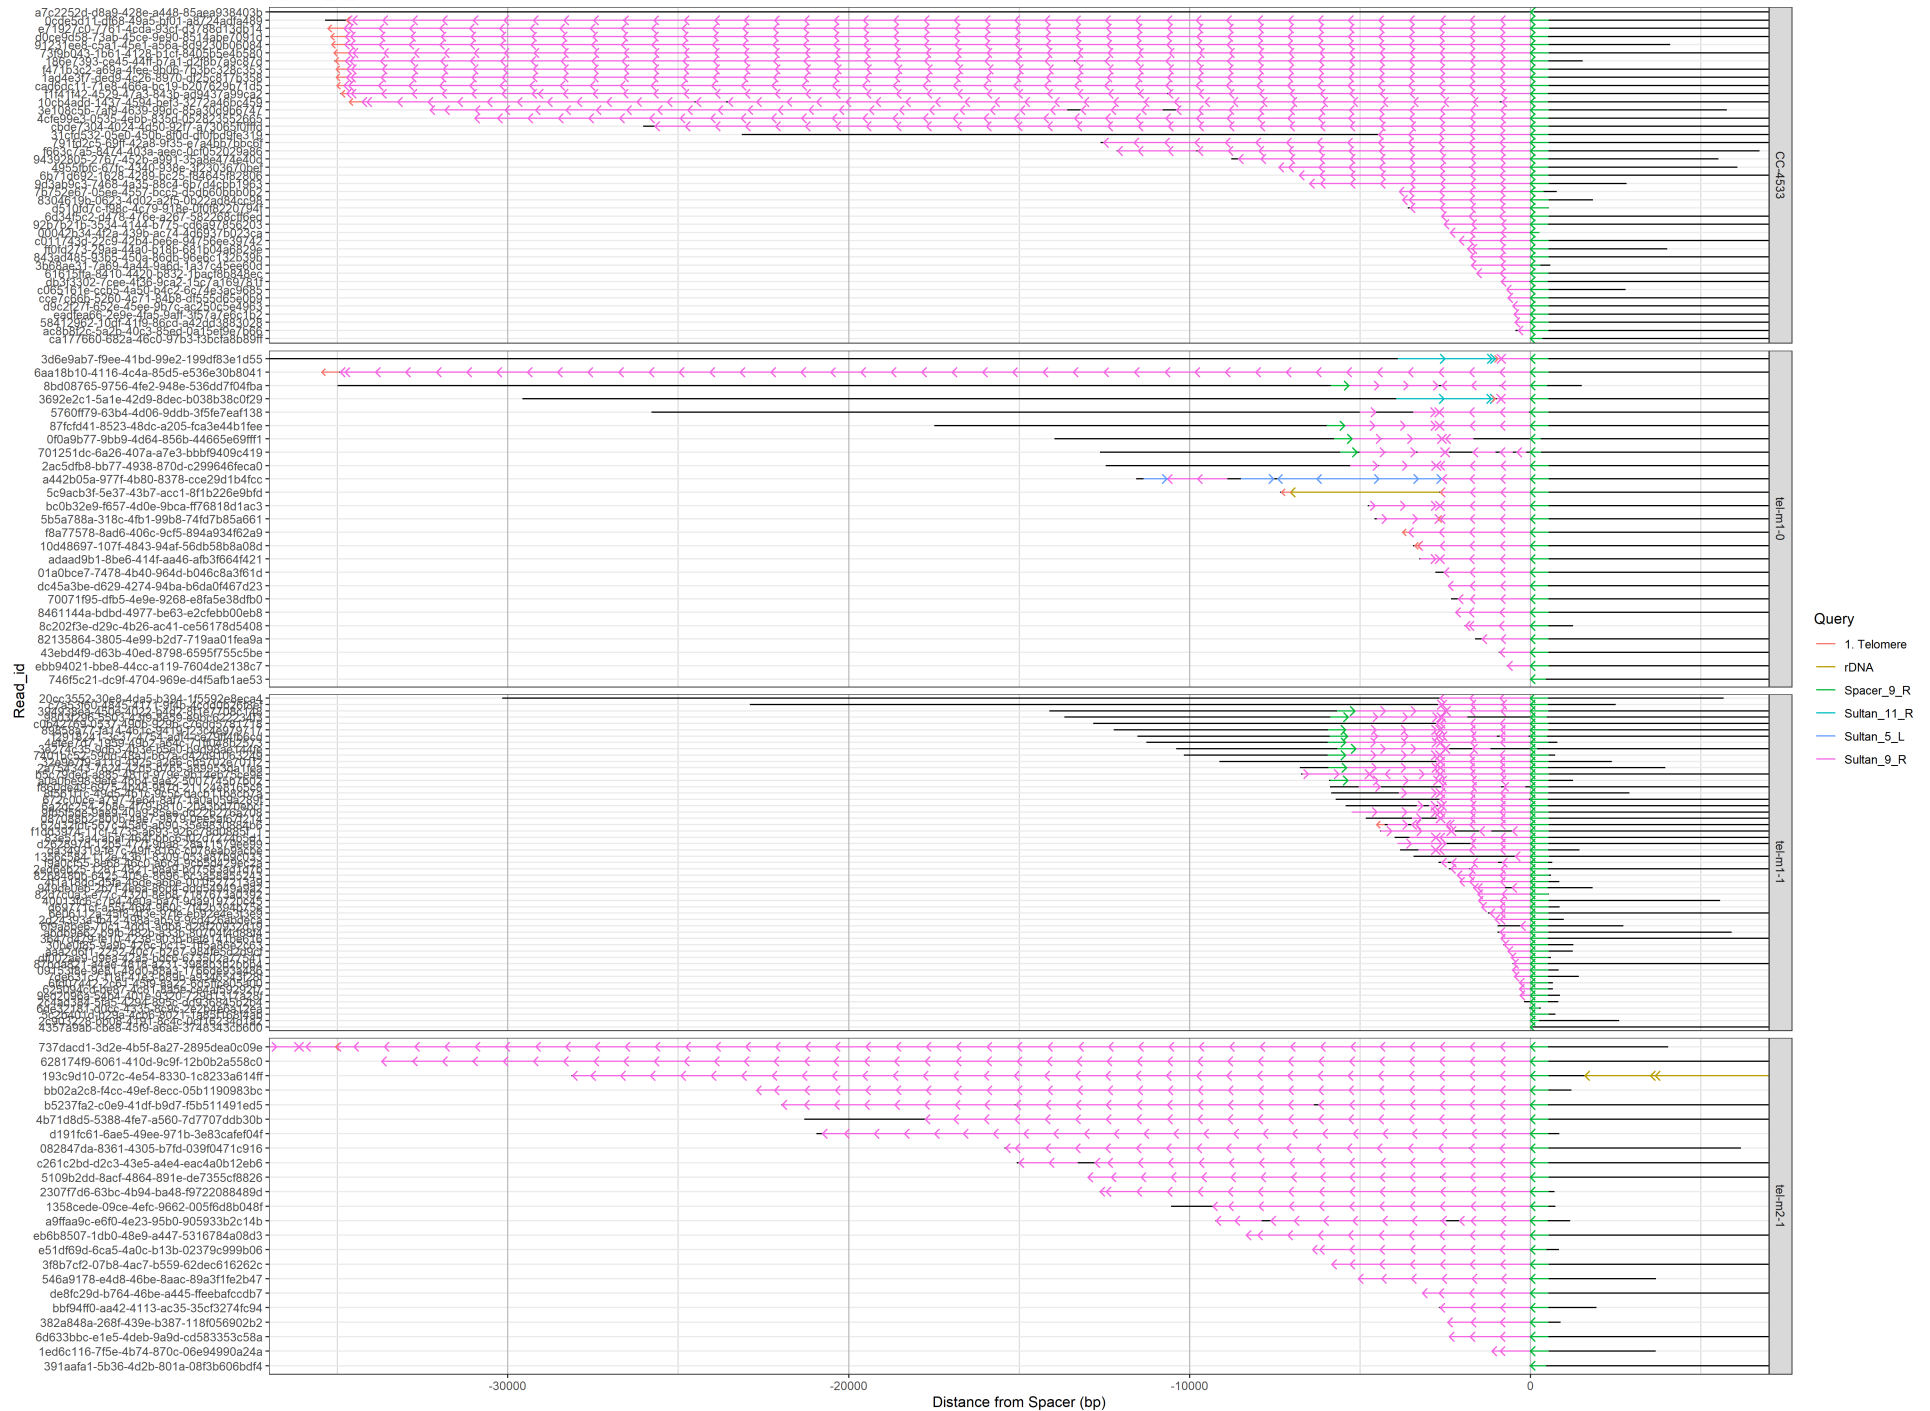



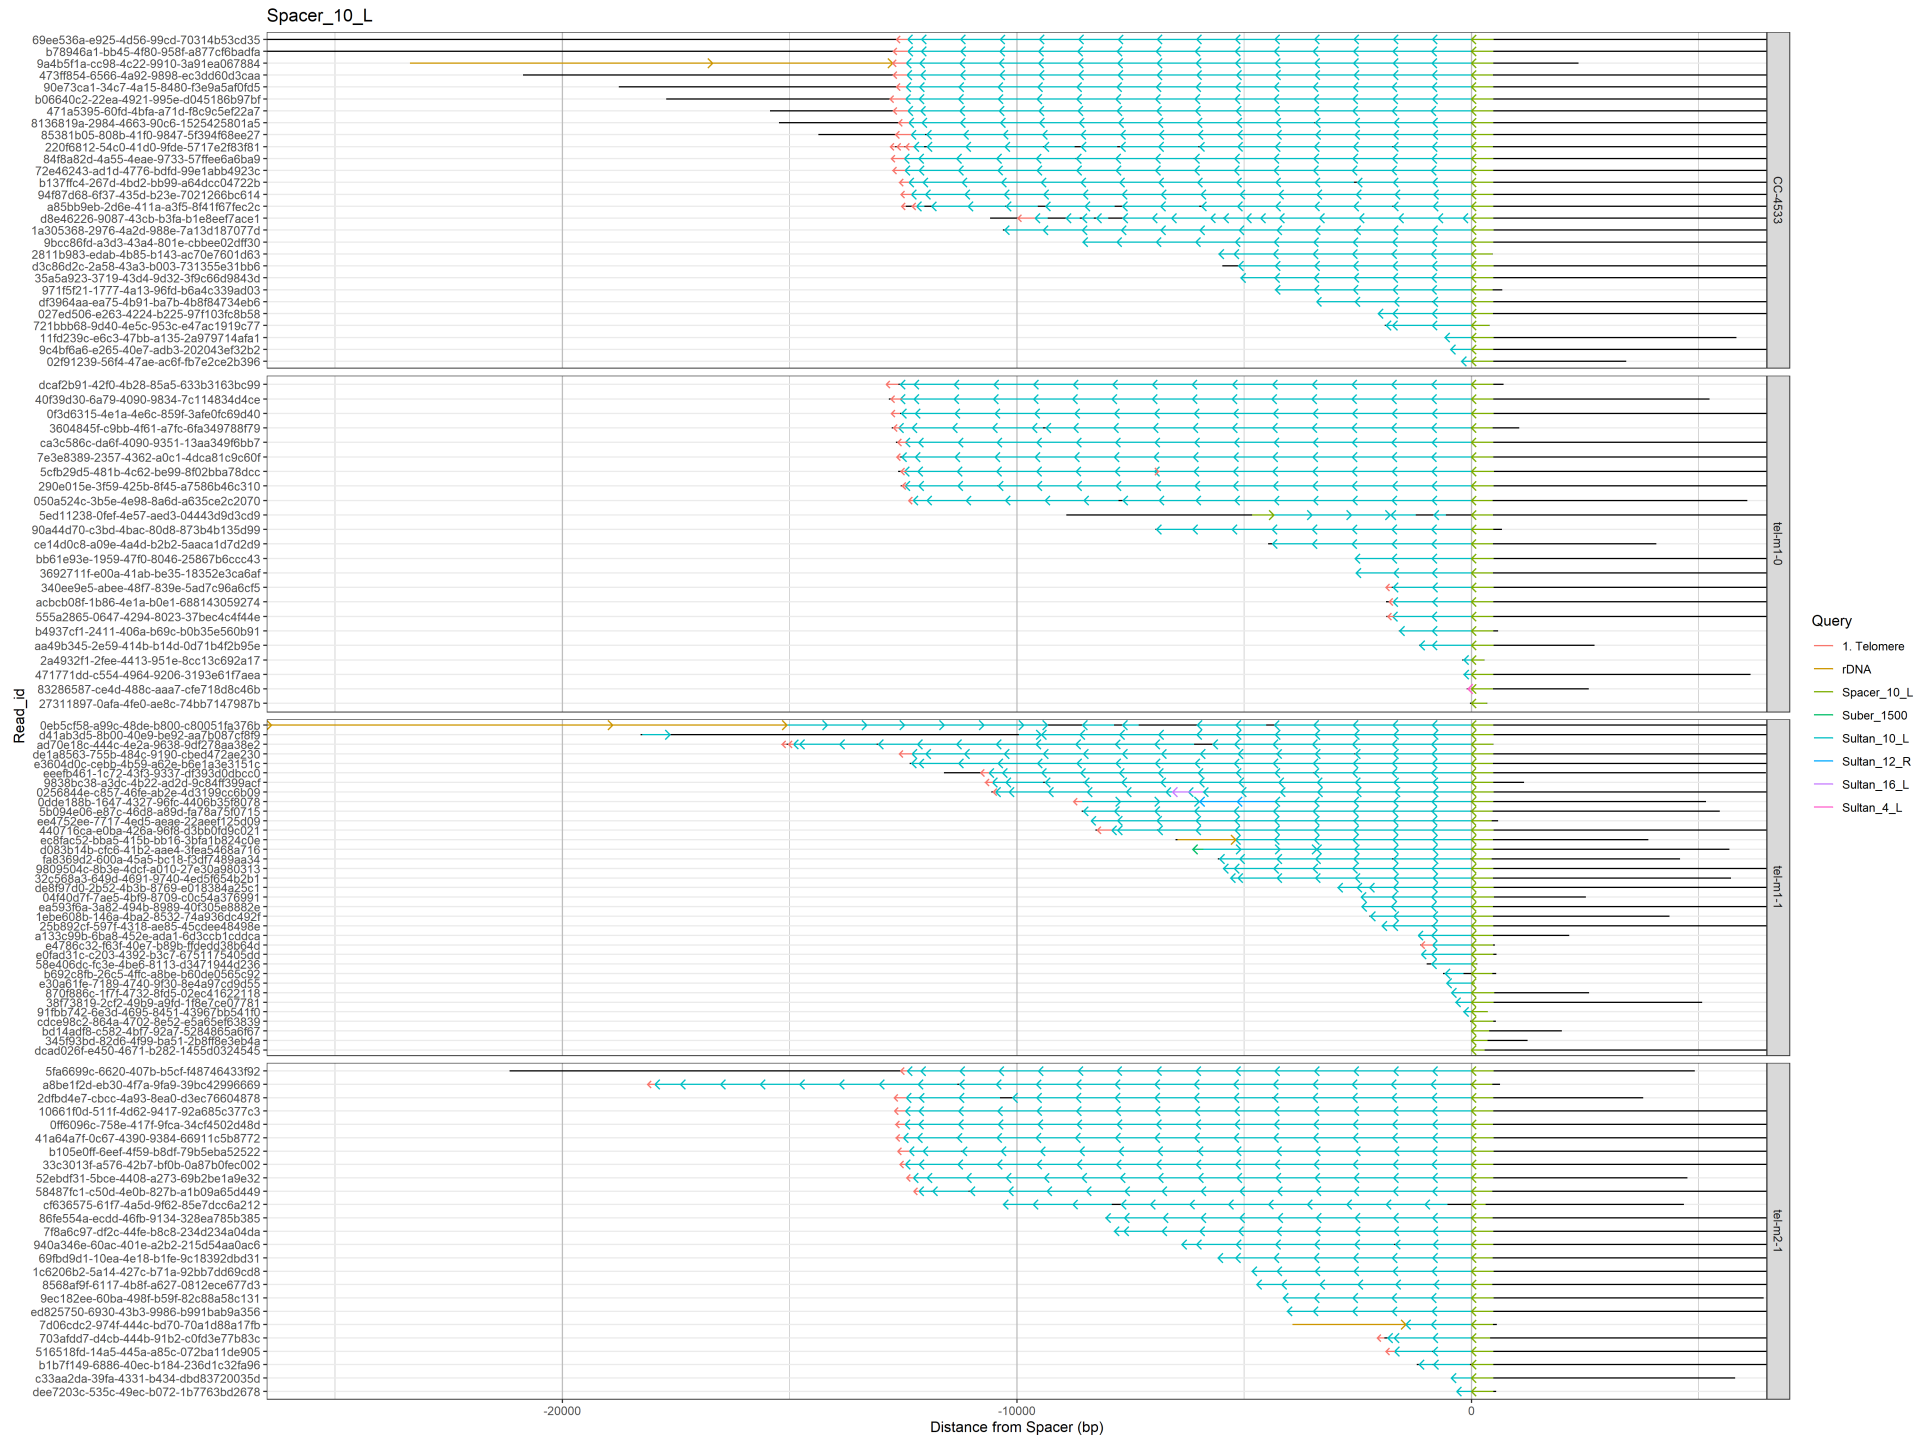

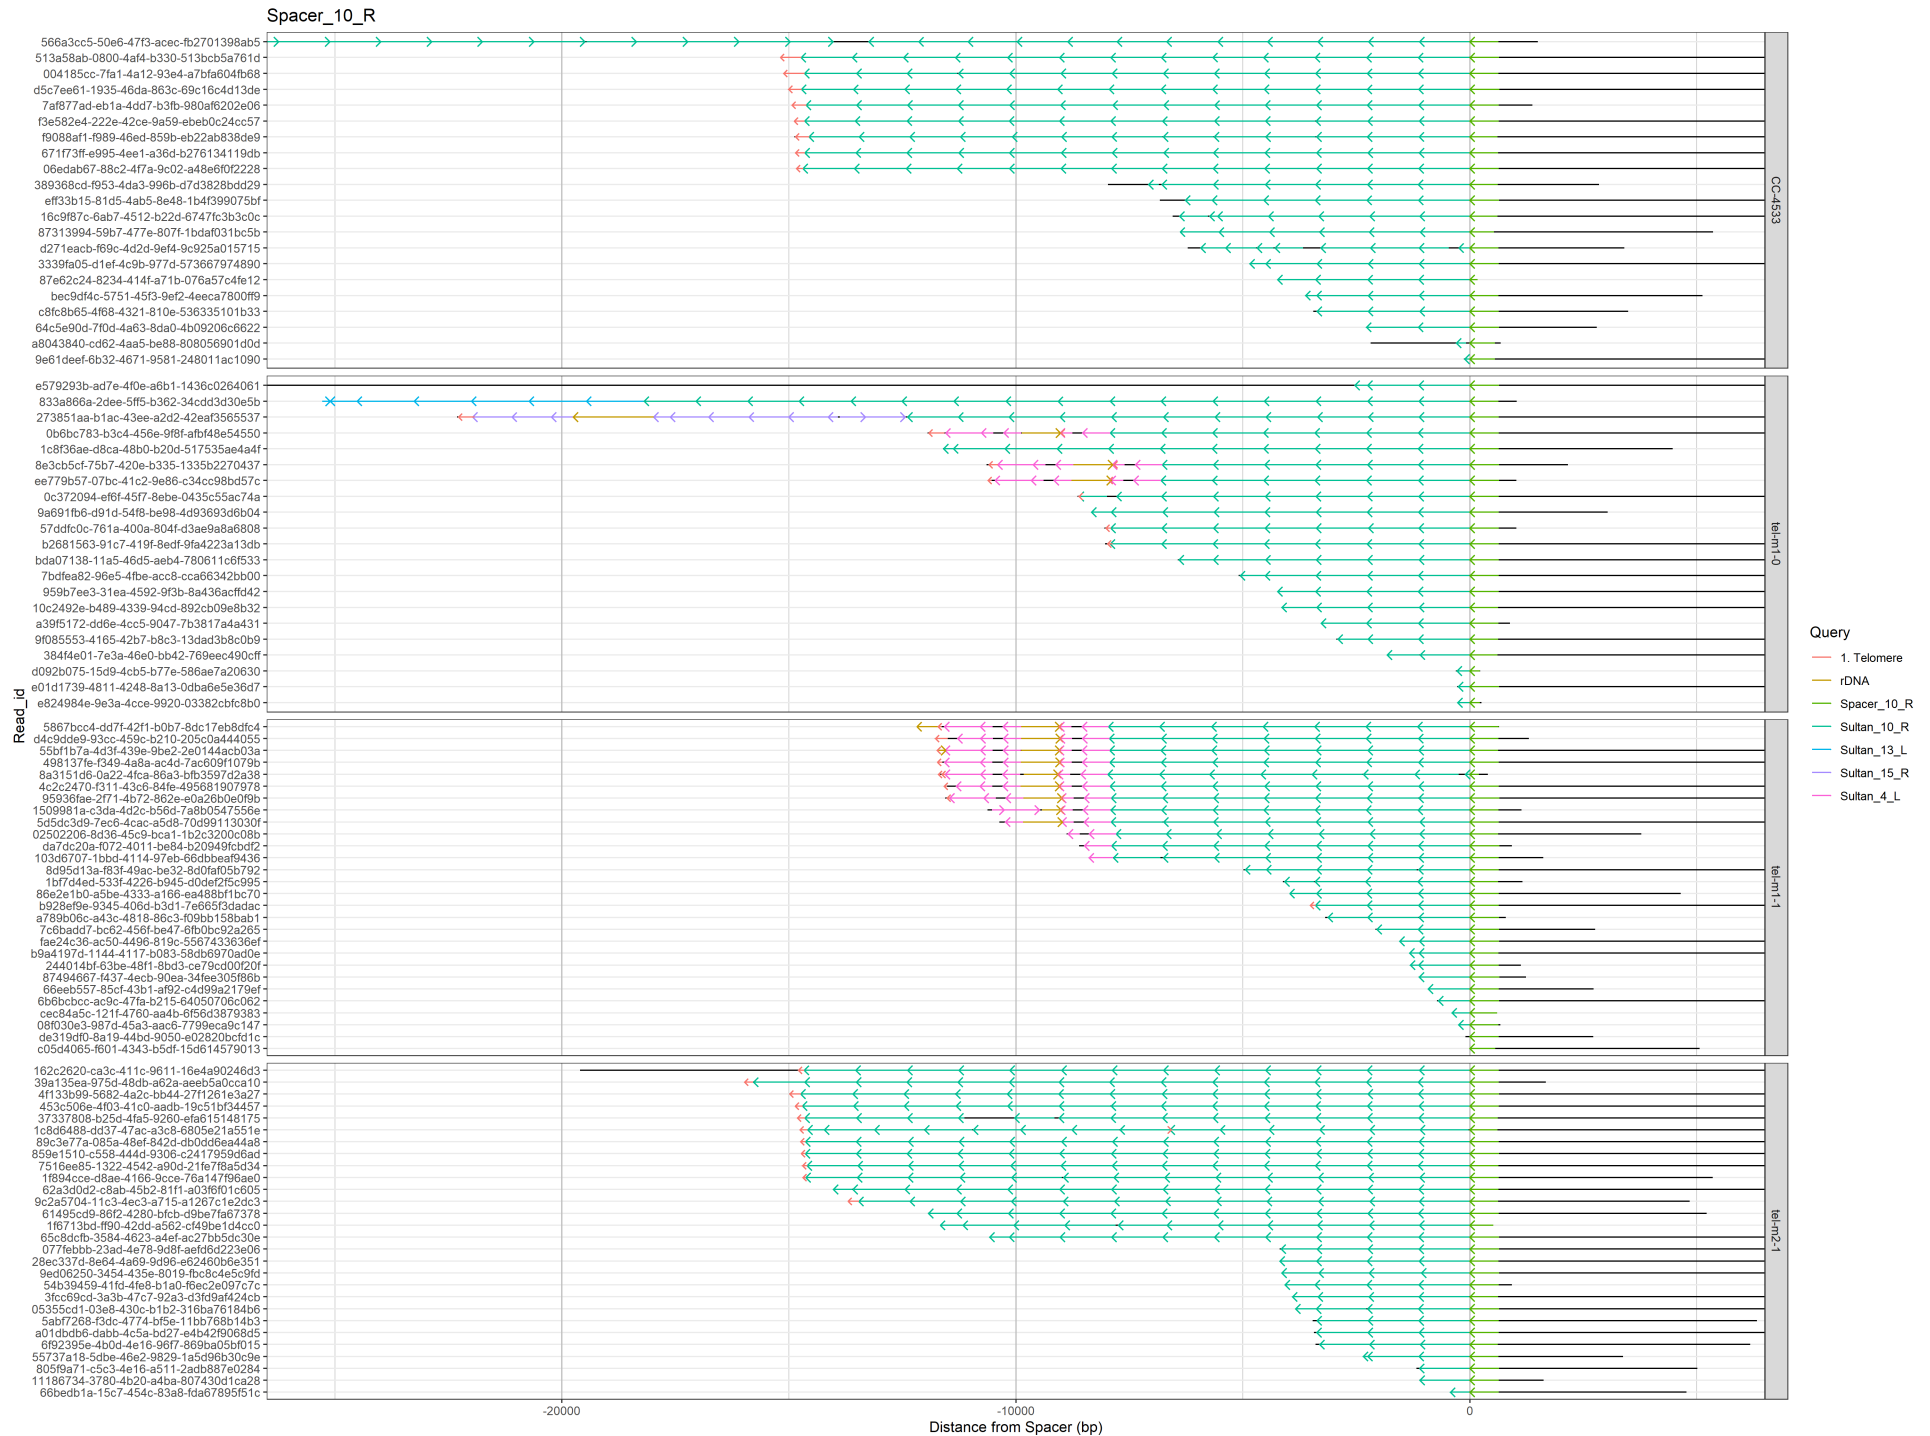

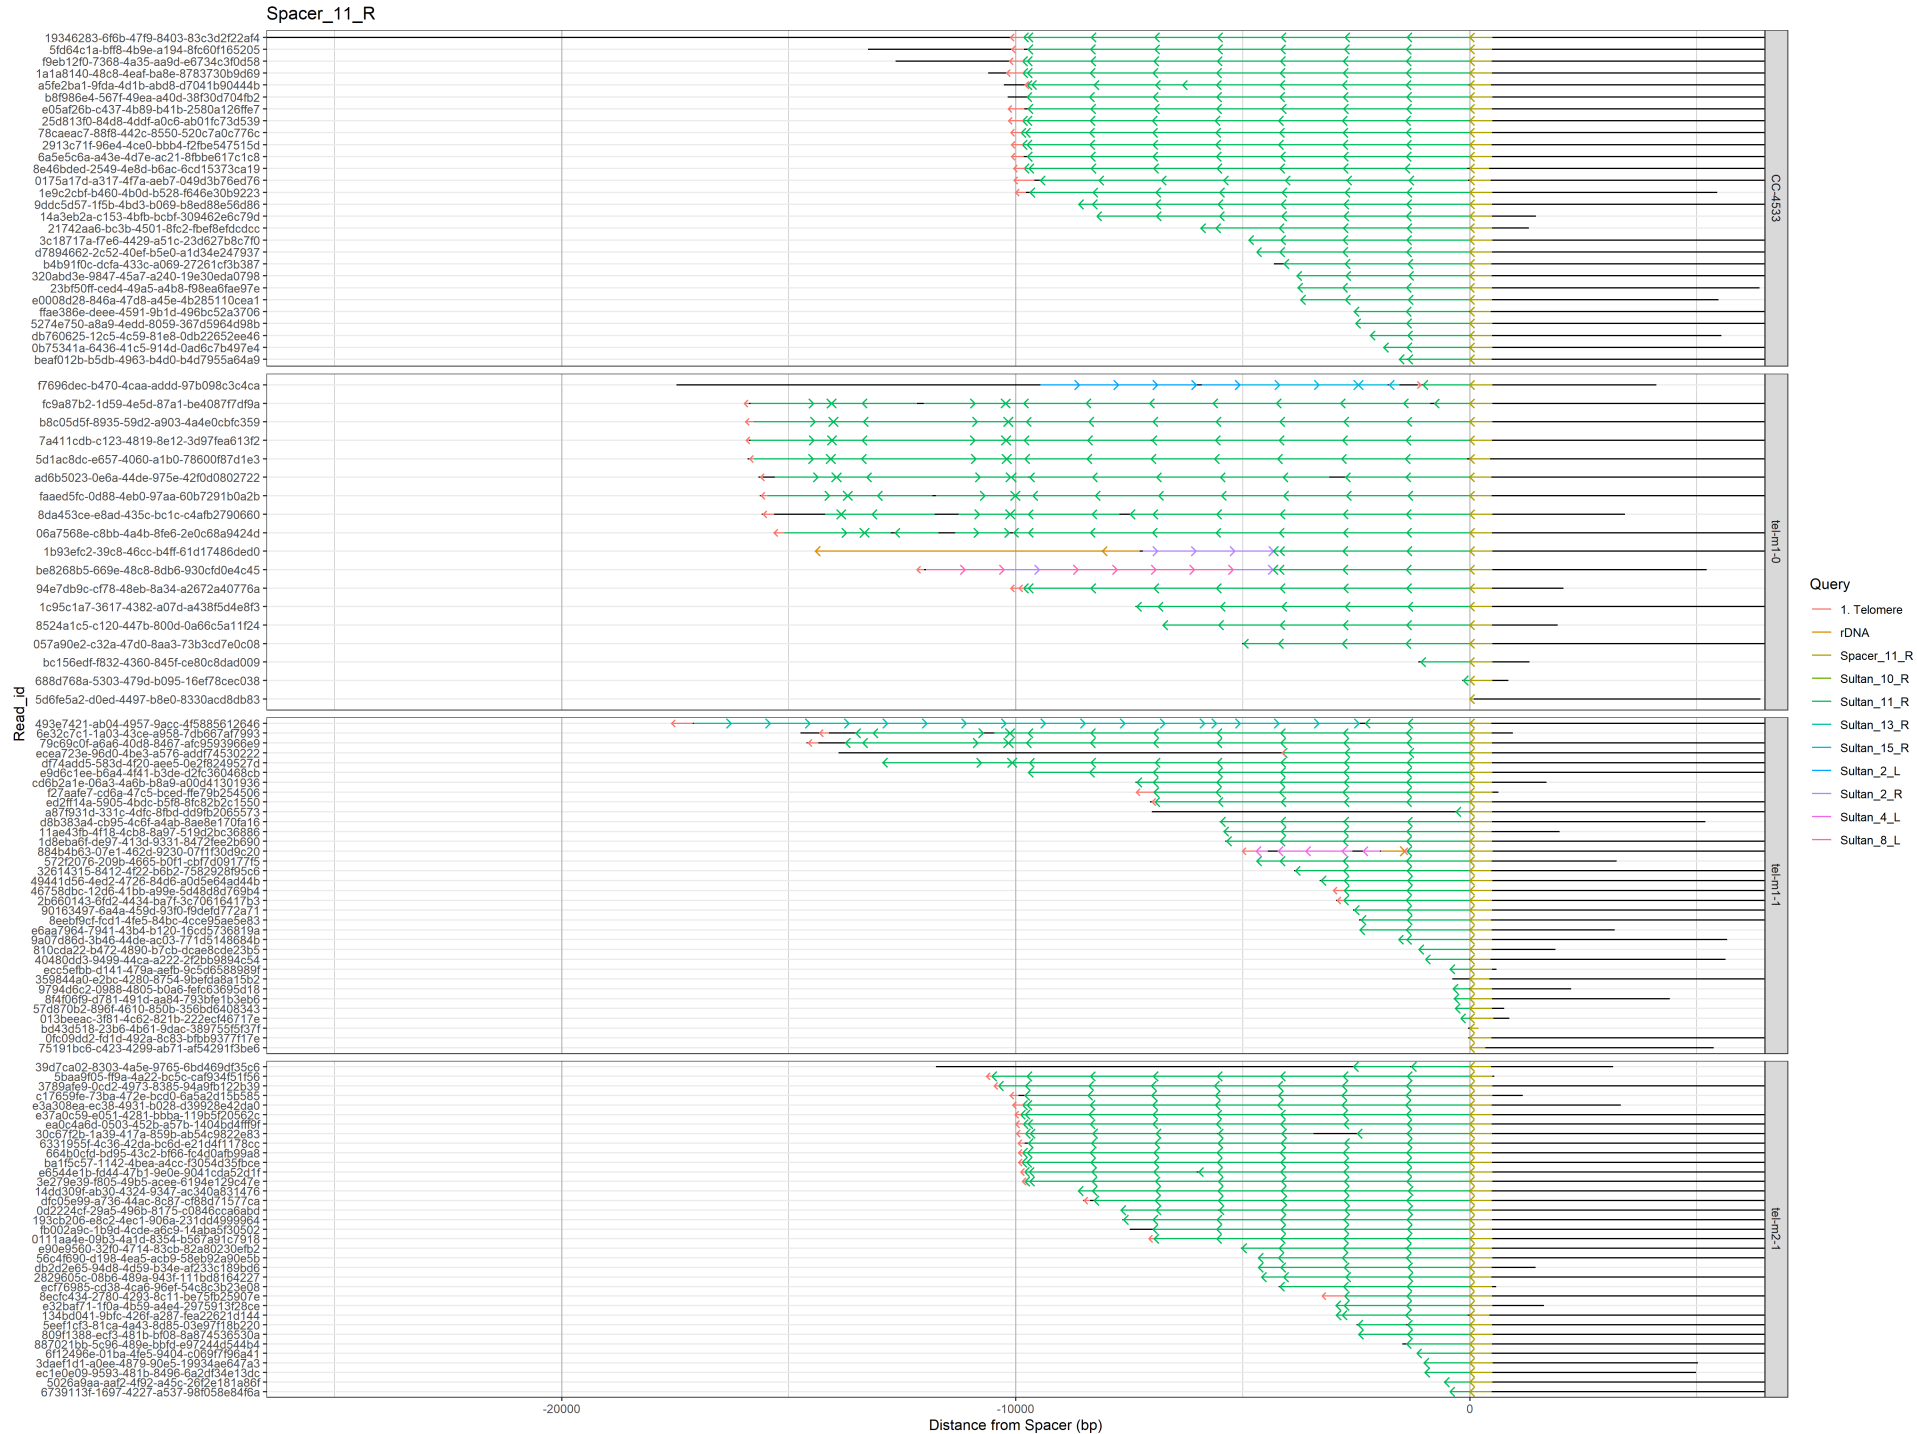



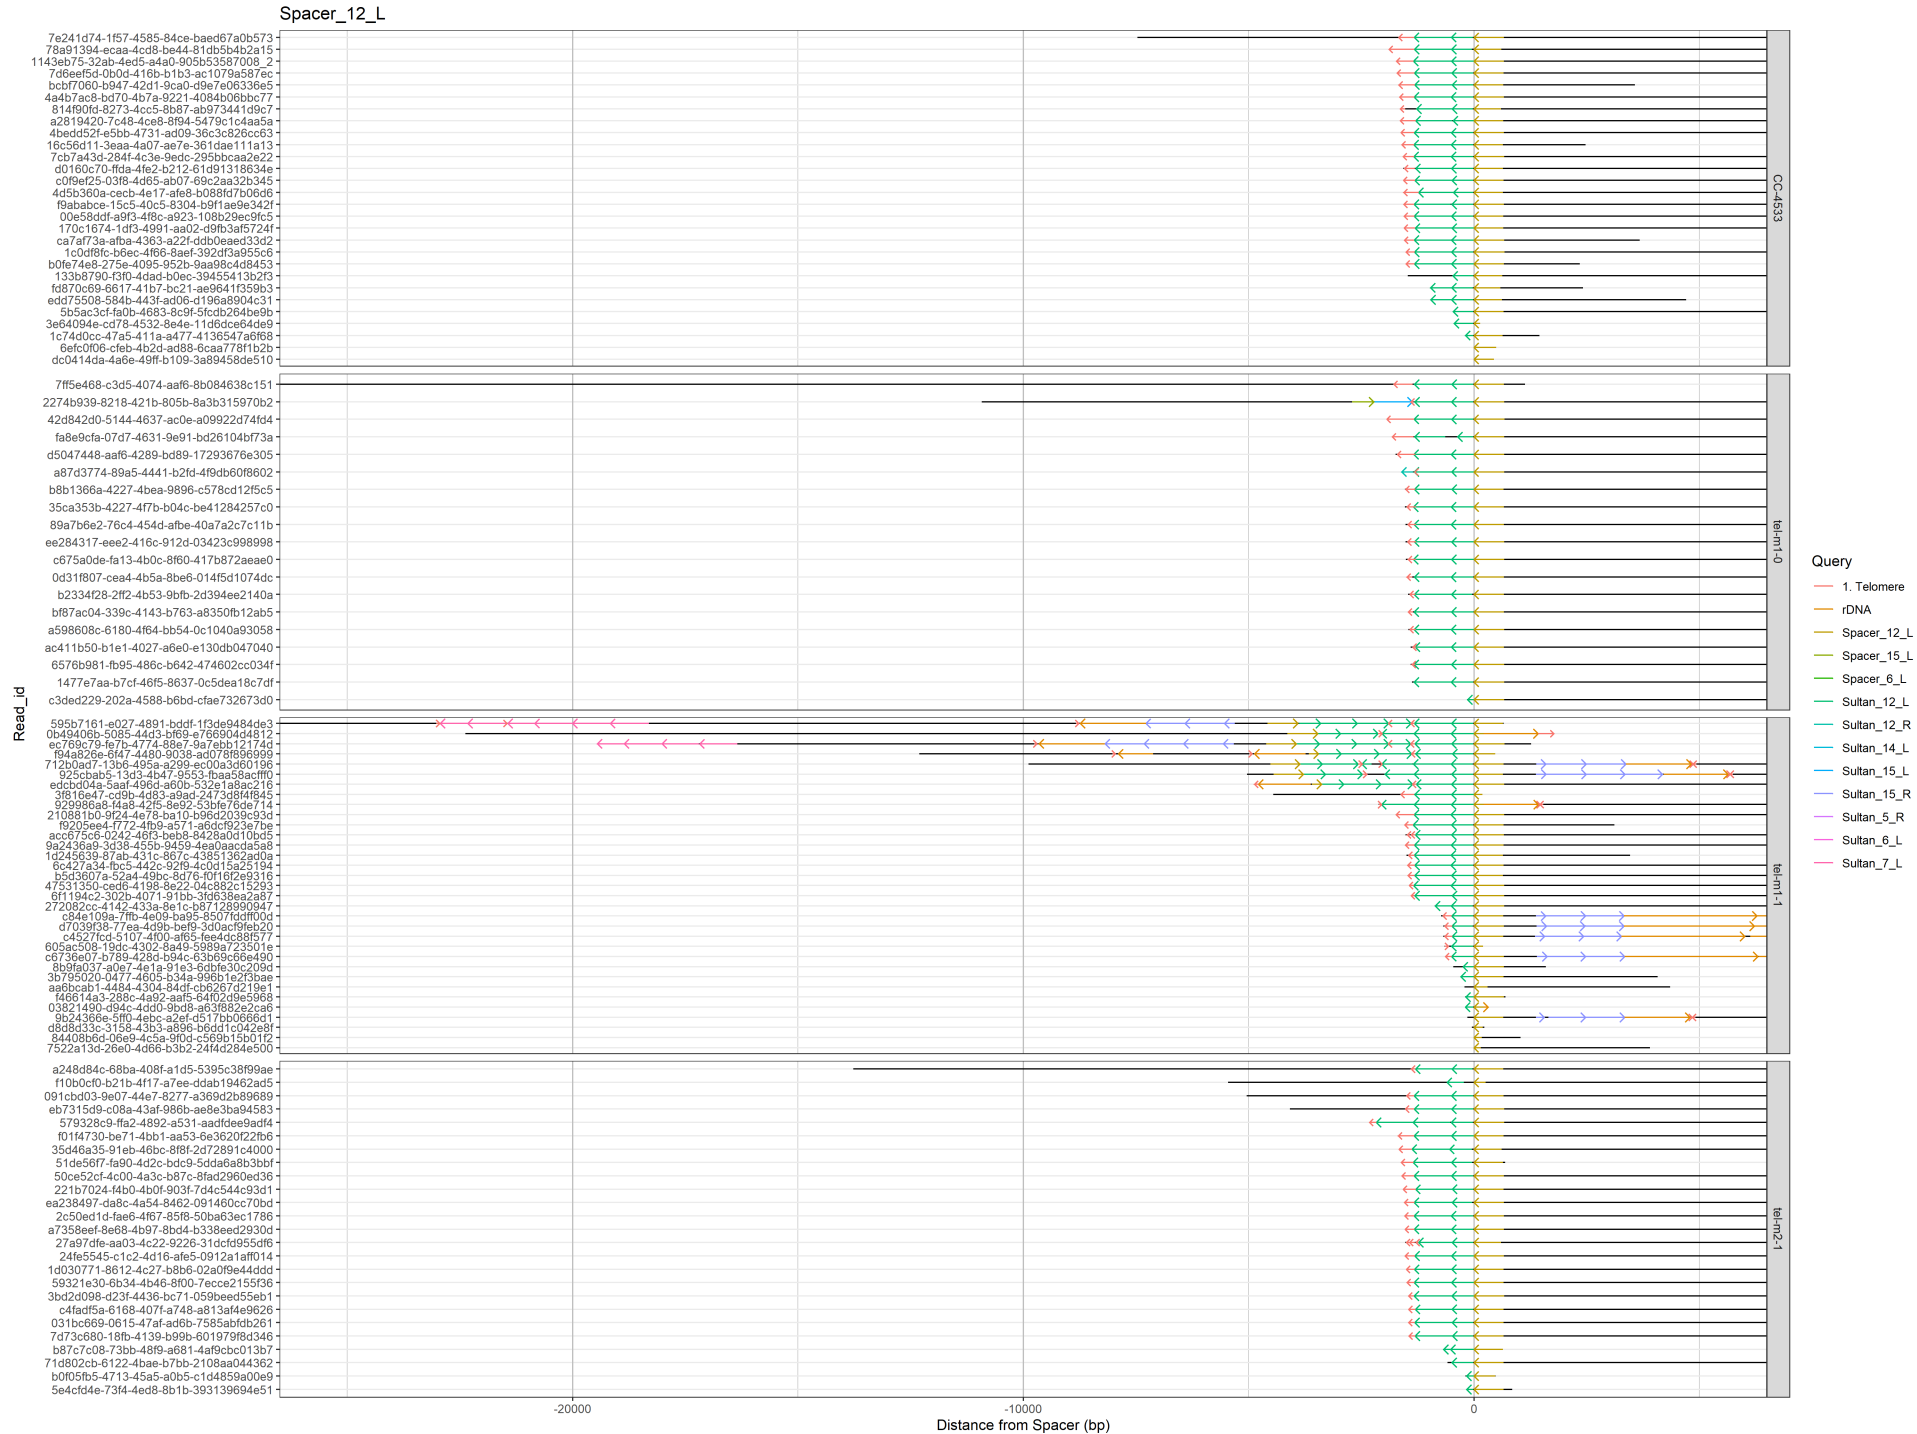

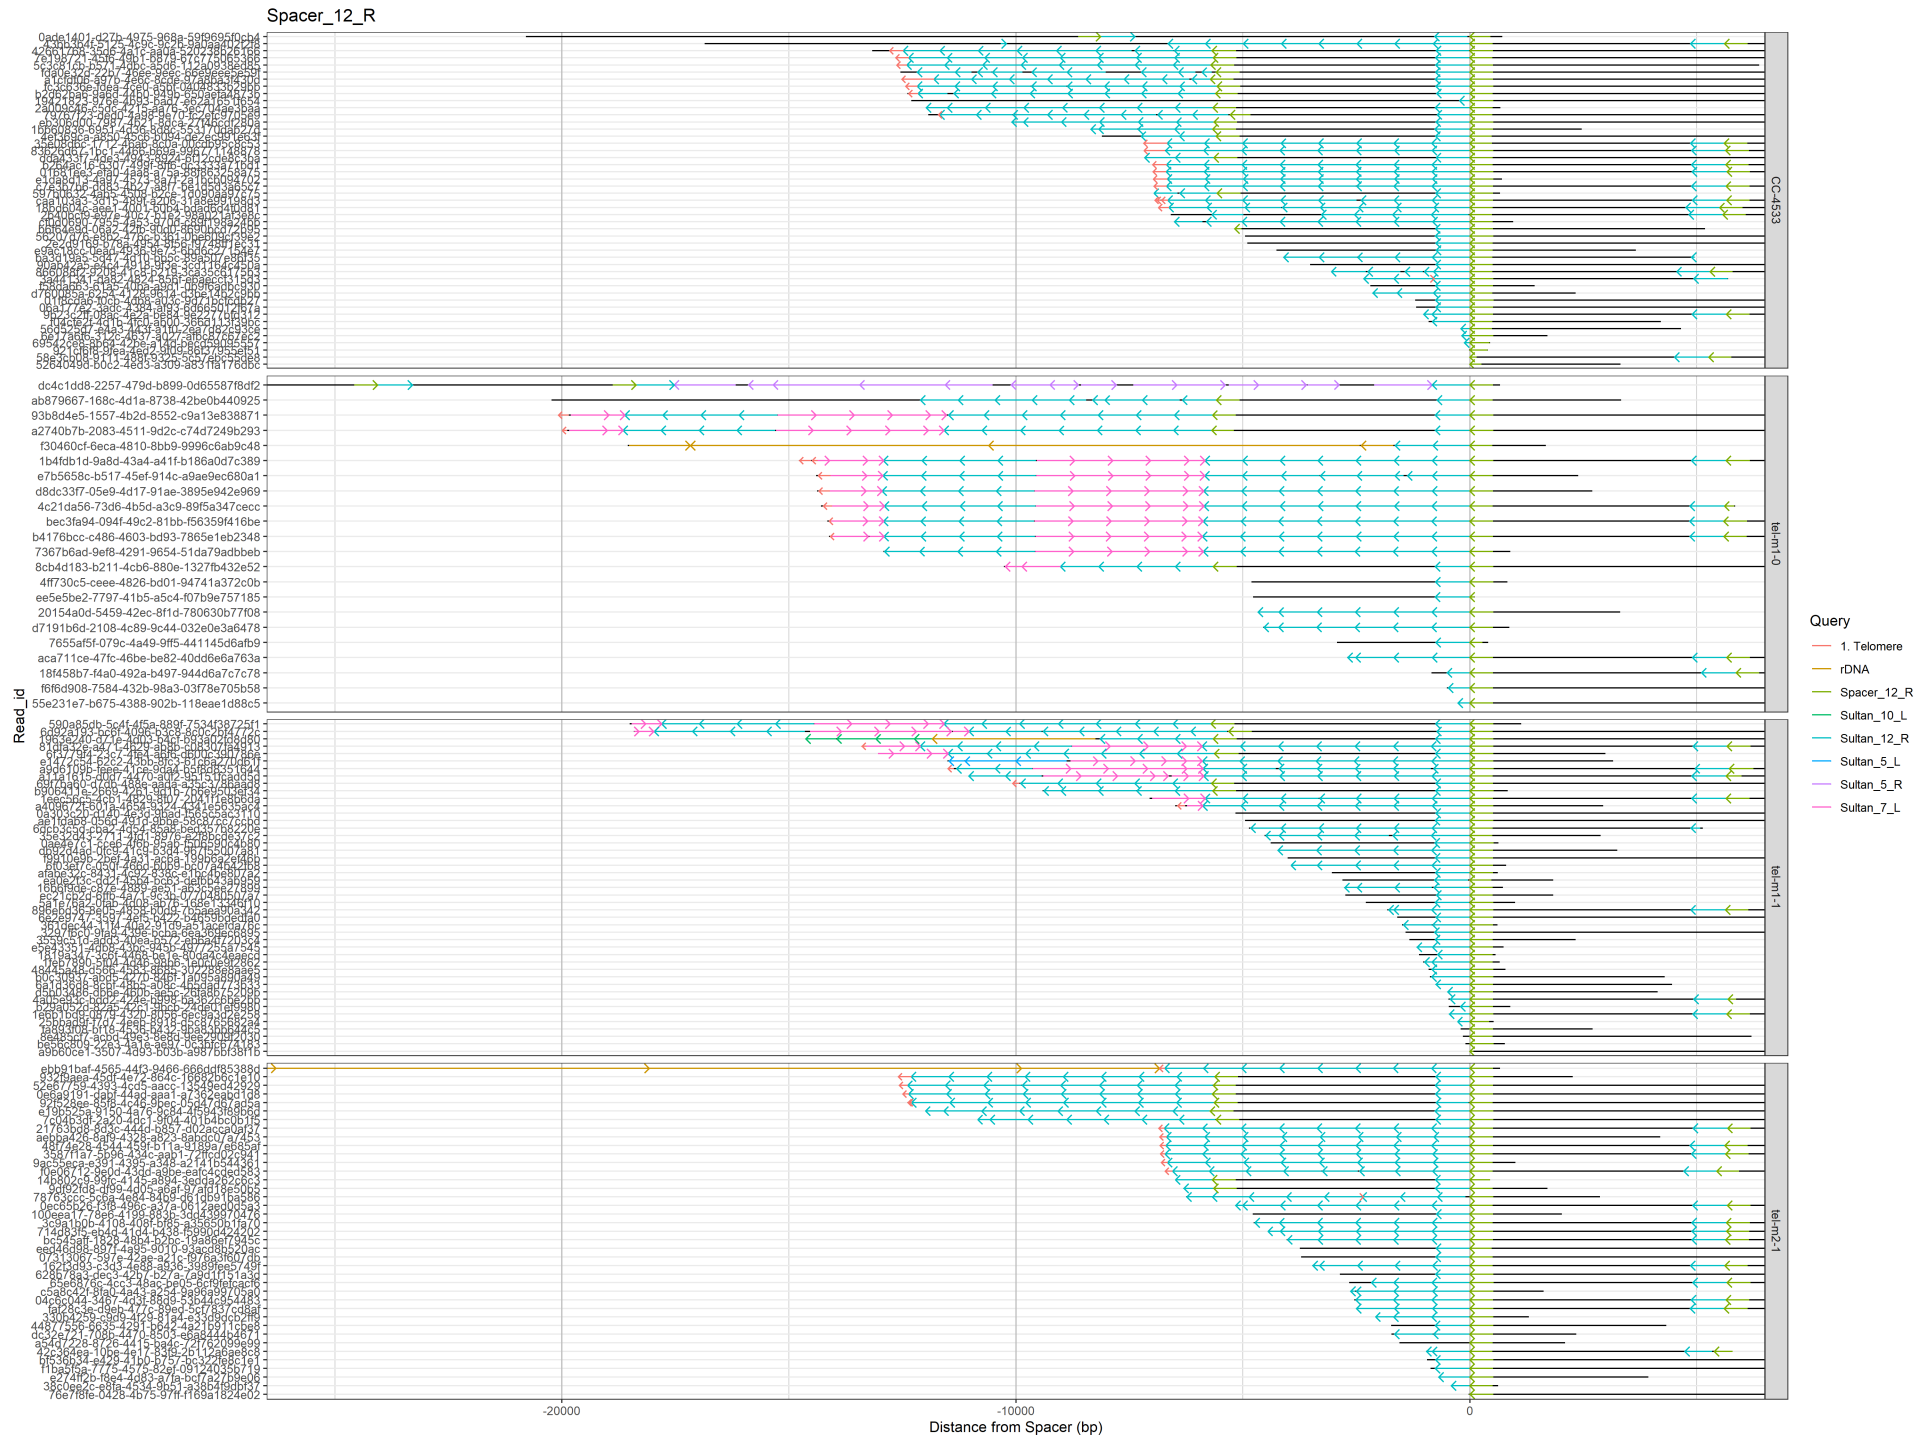

Spacer\_13\_L

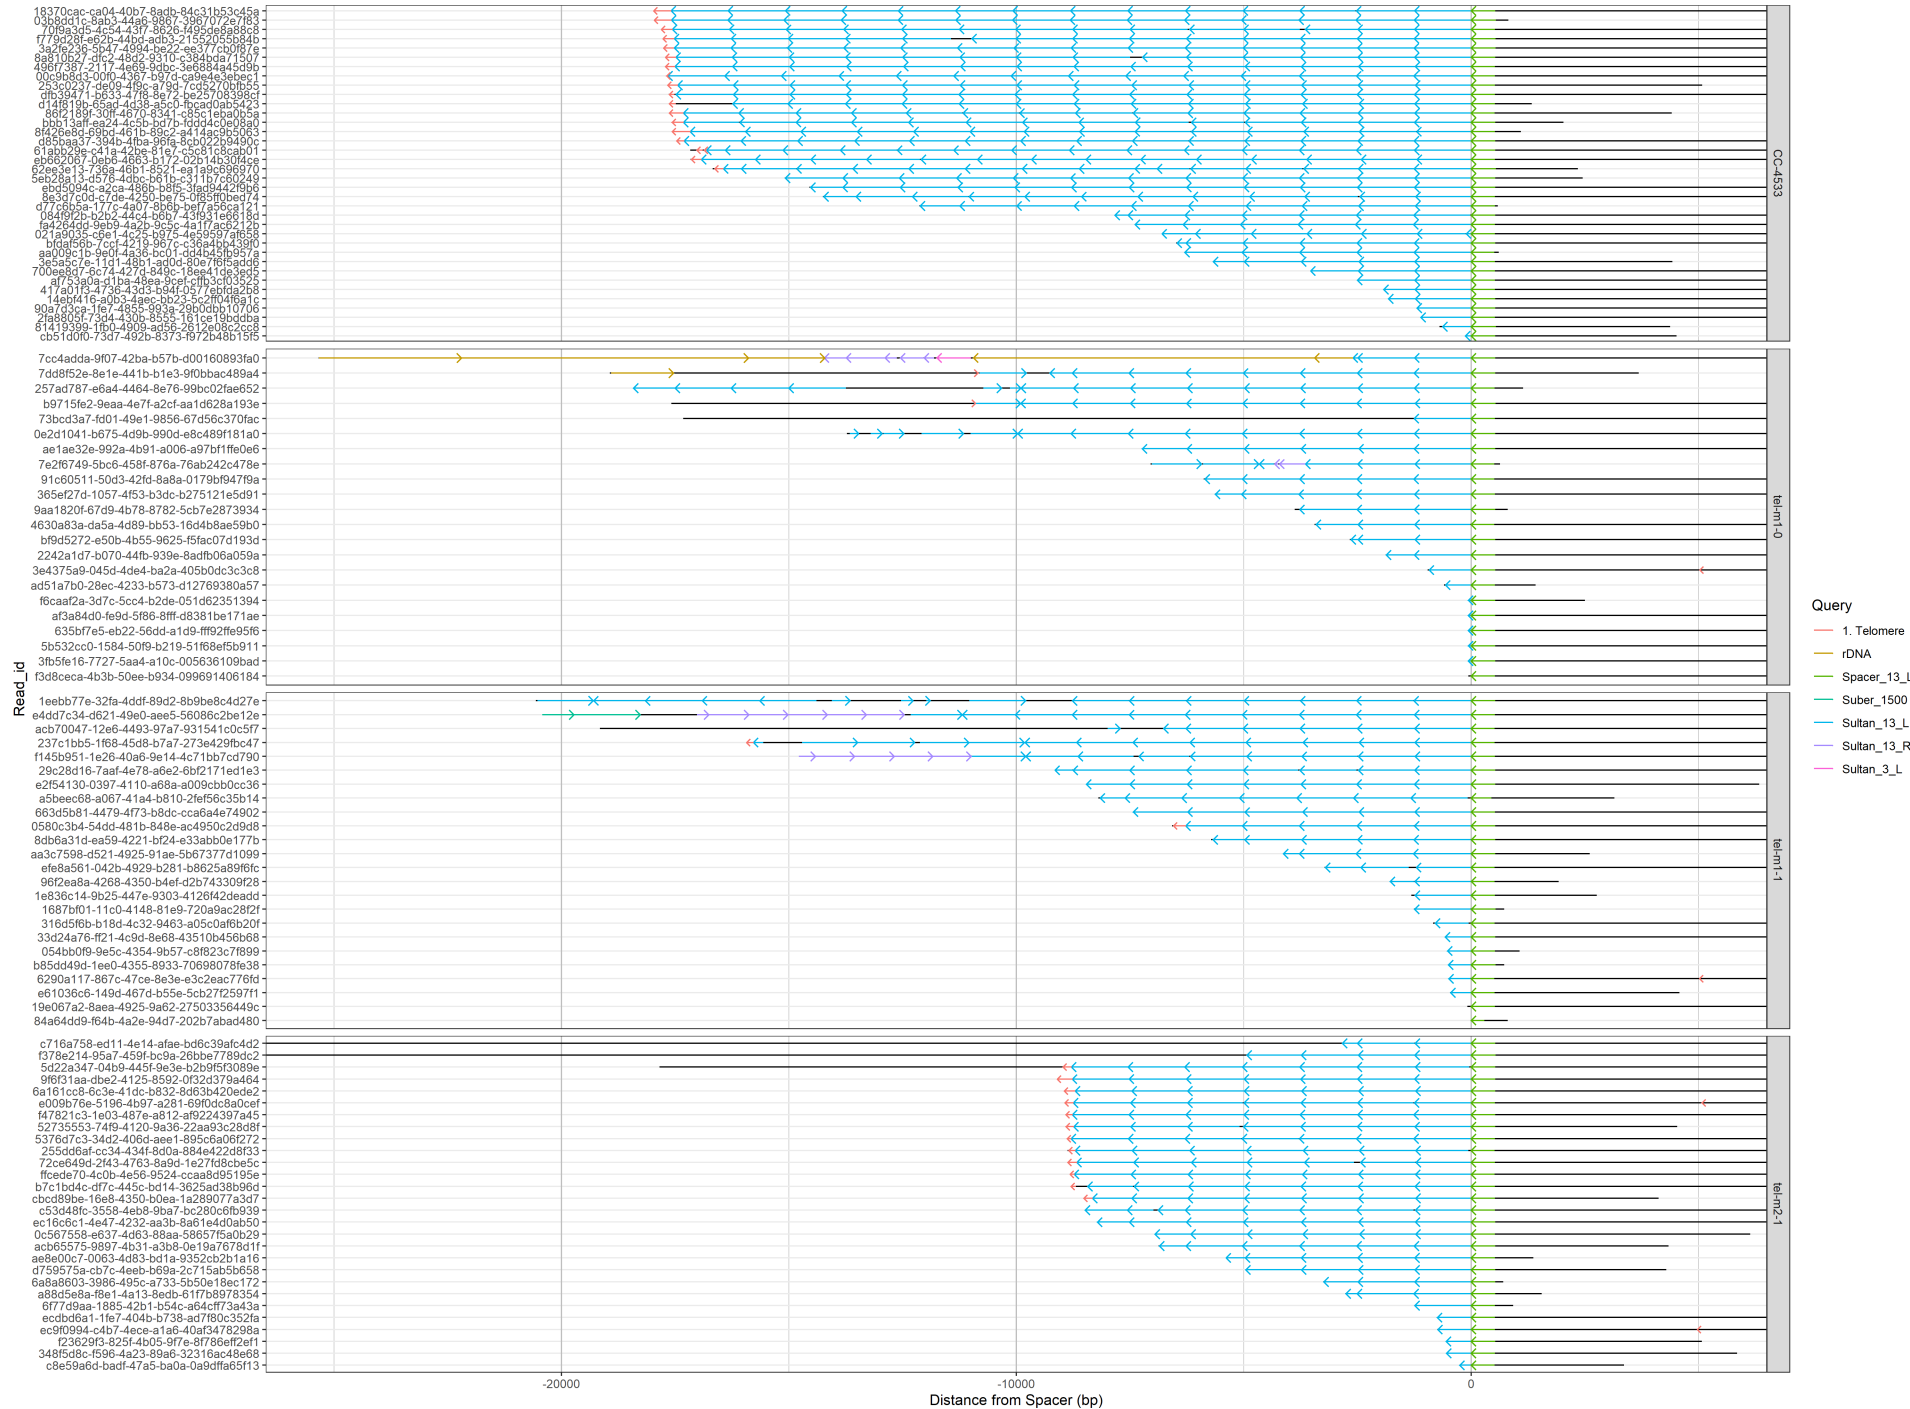

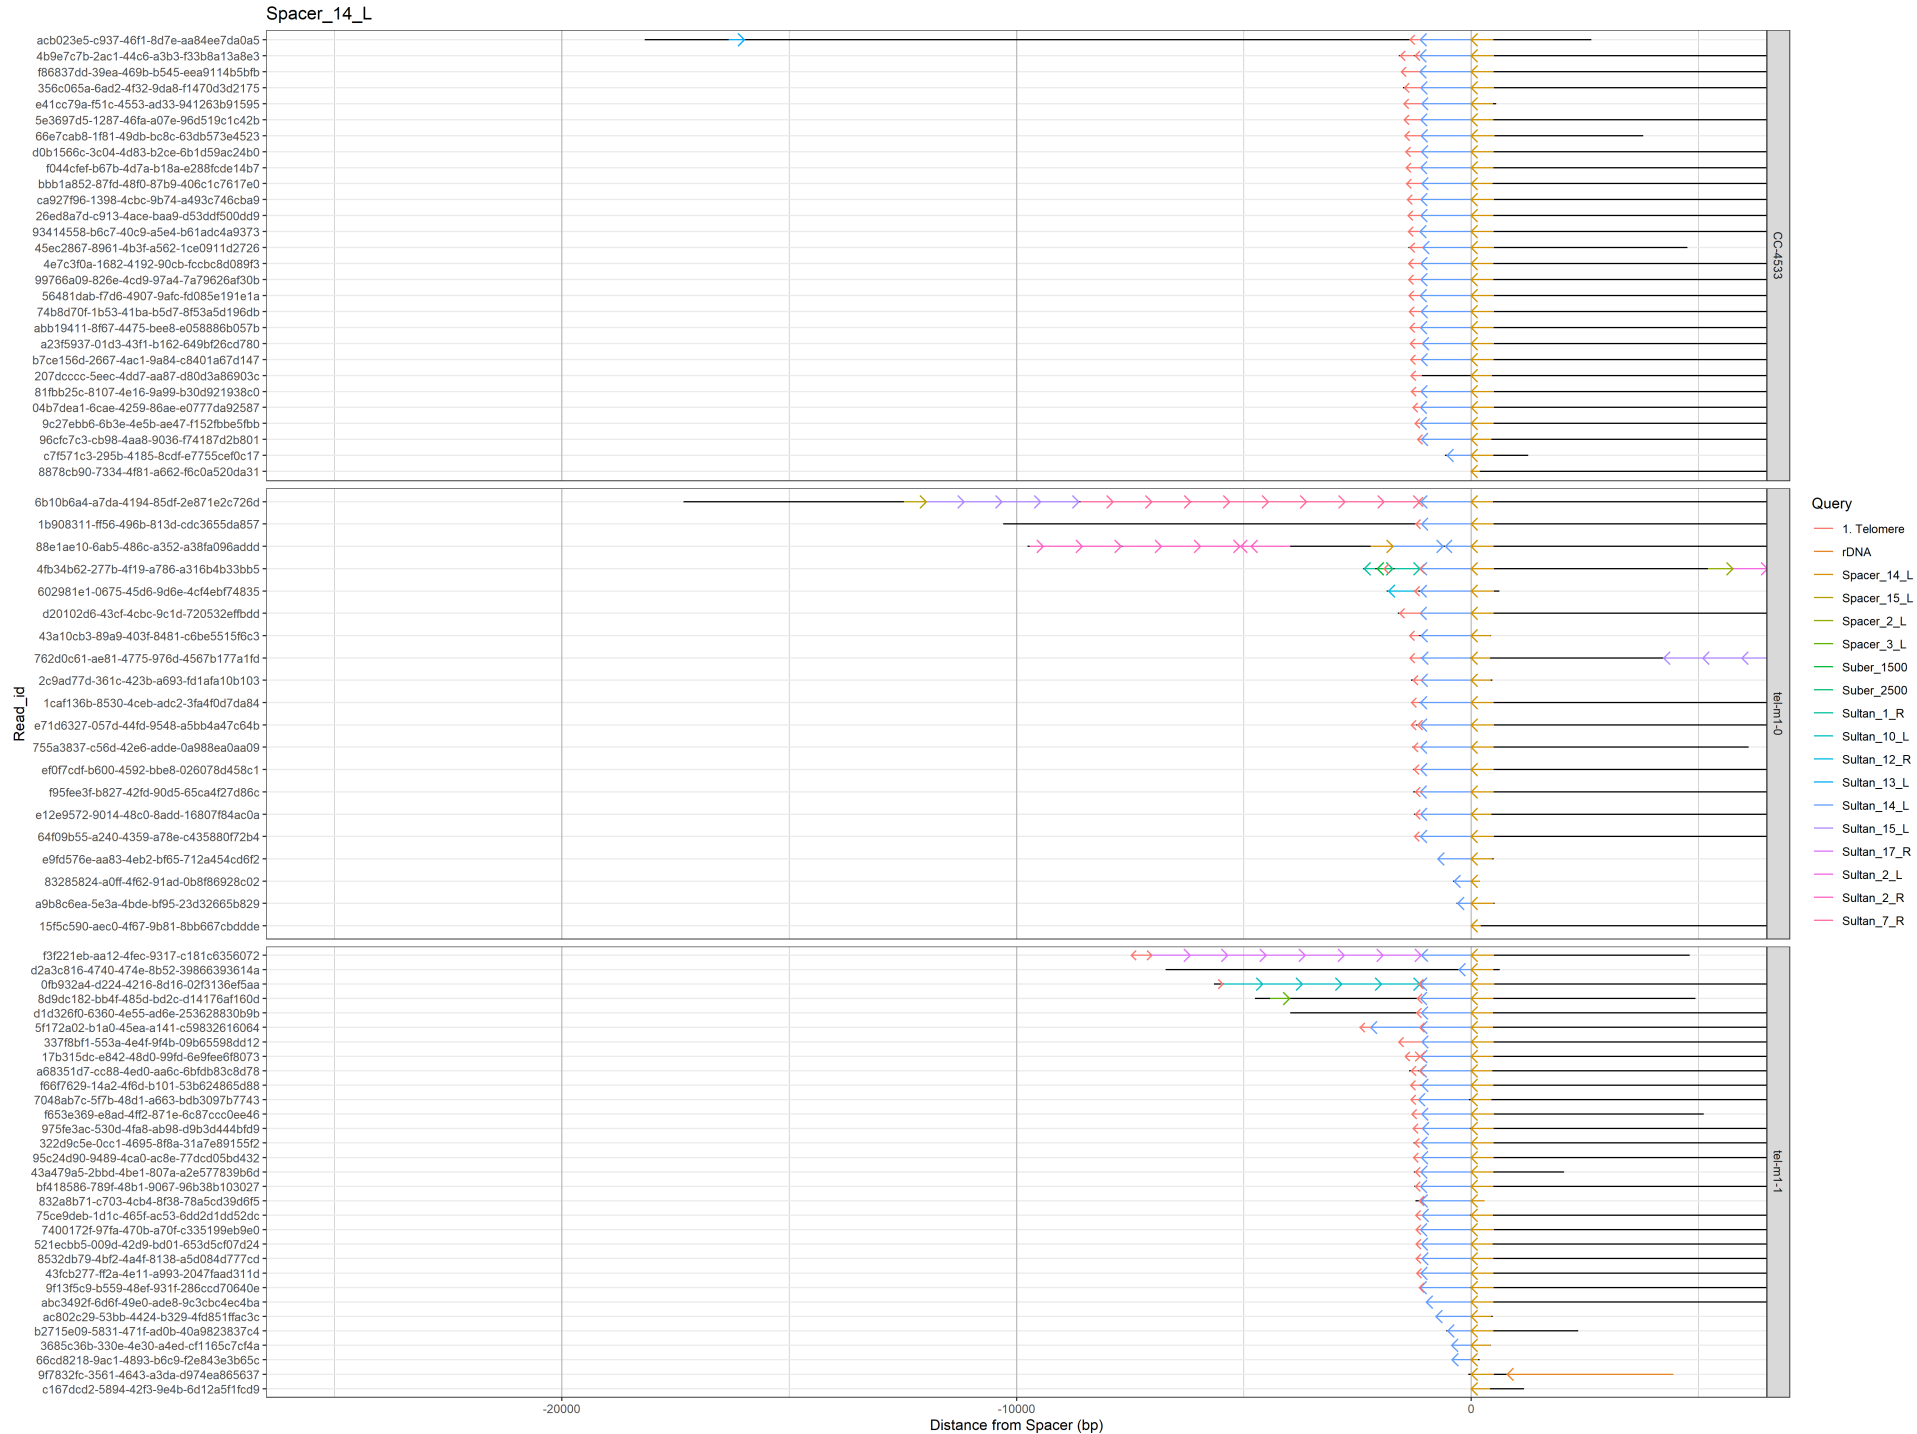

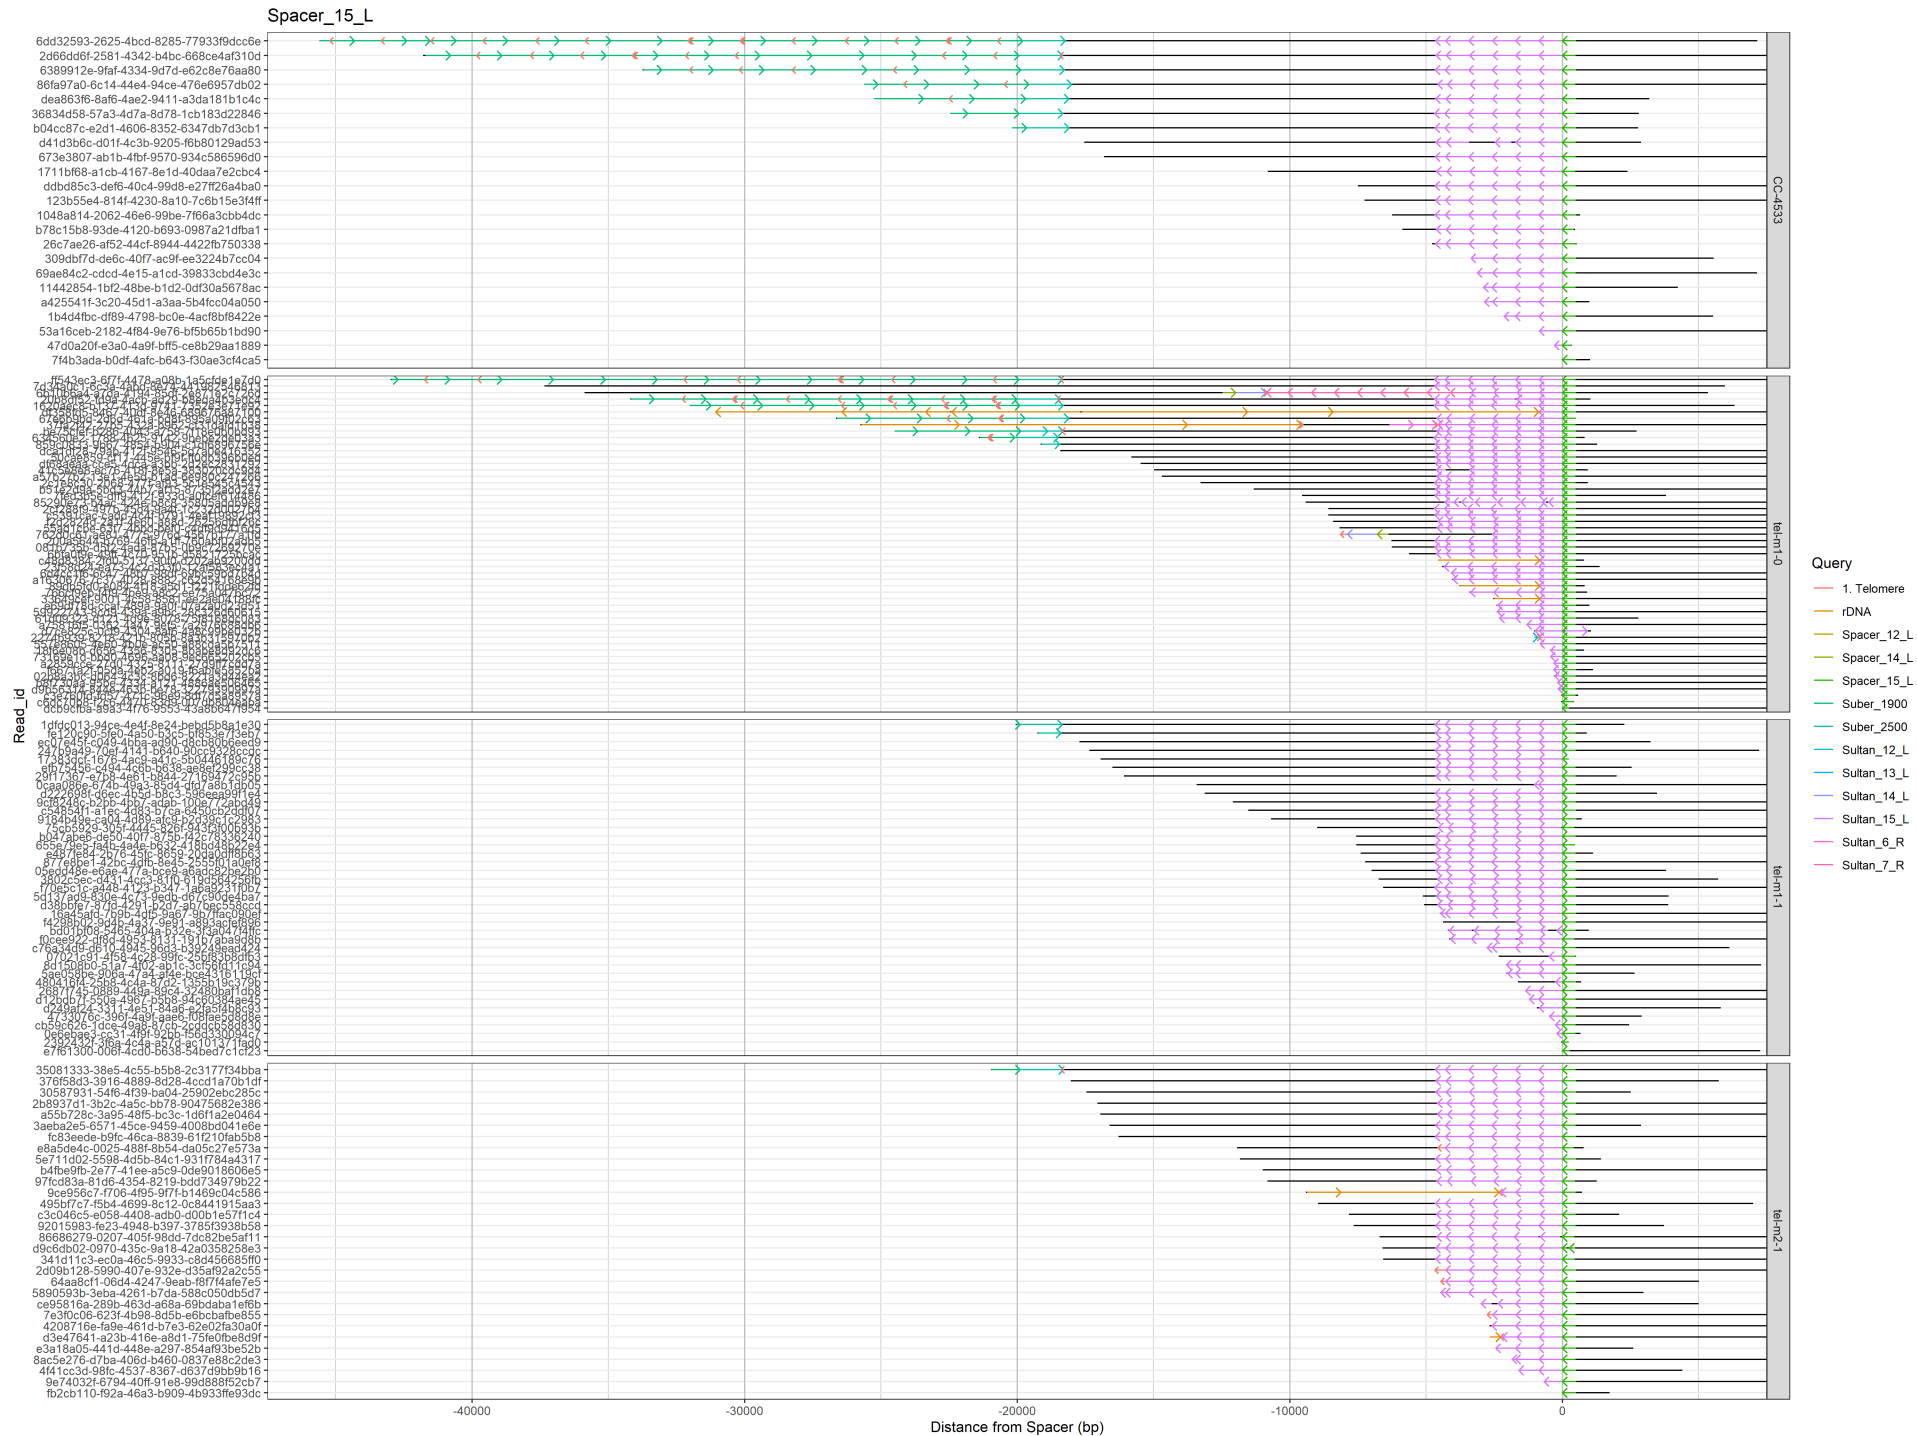



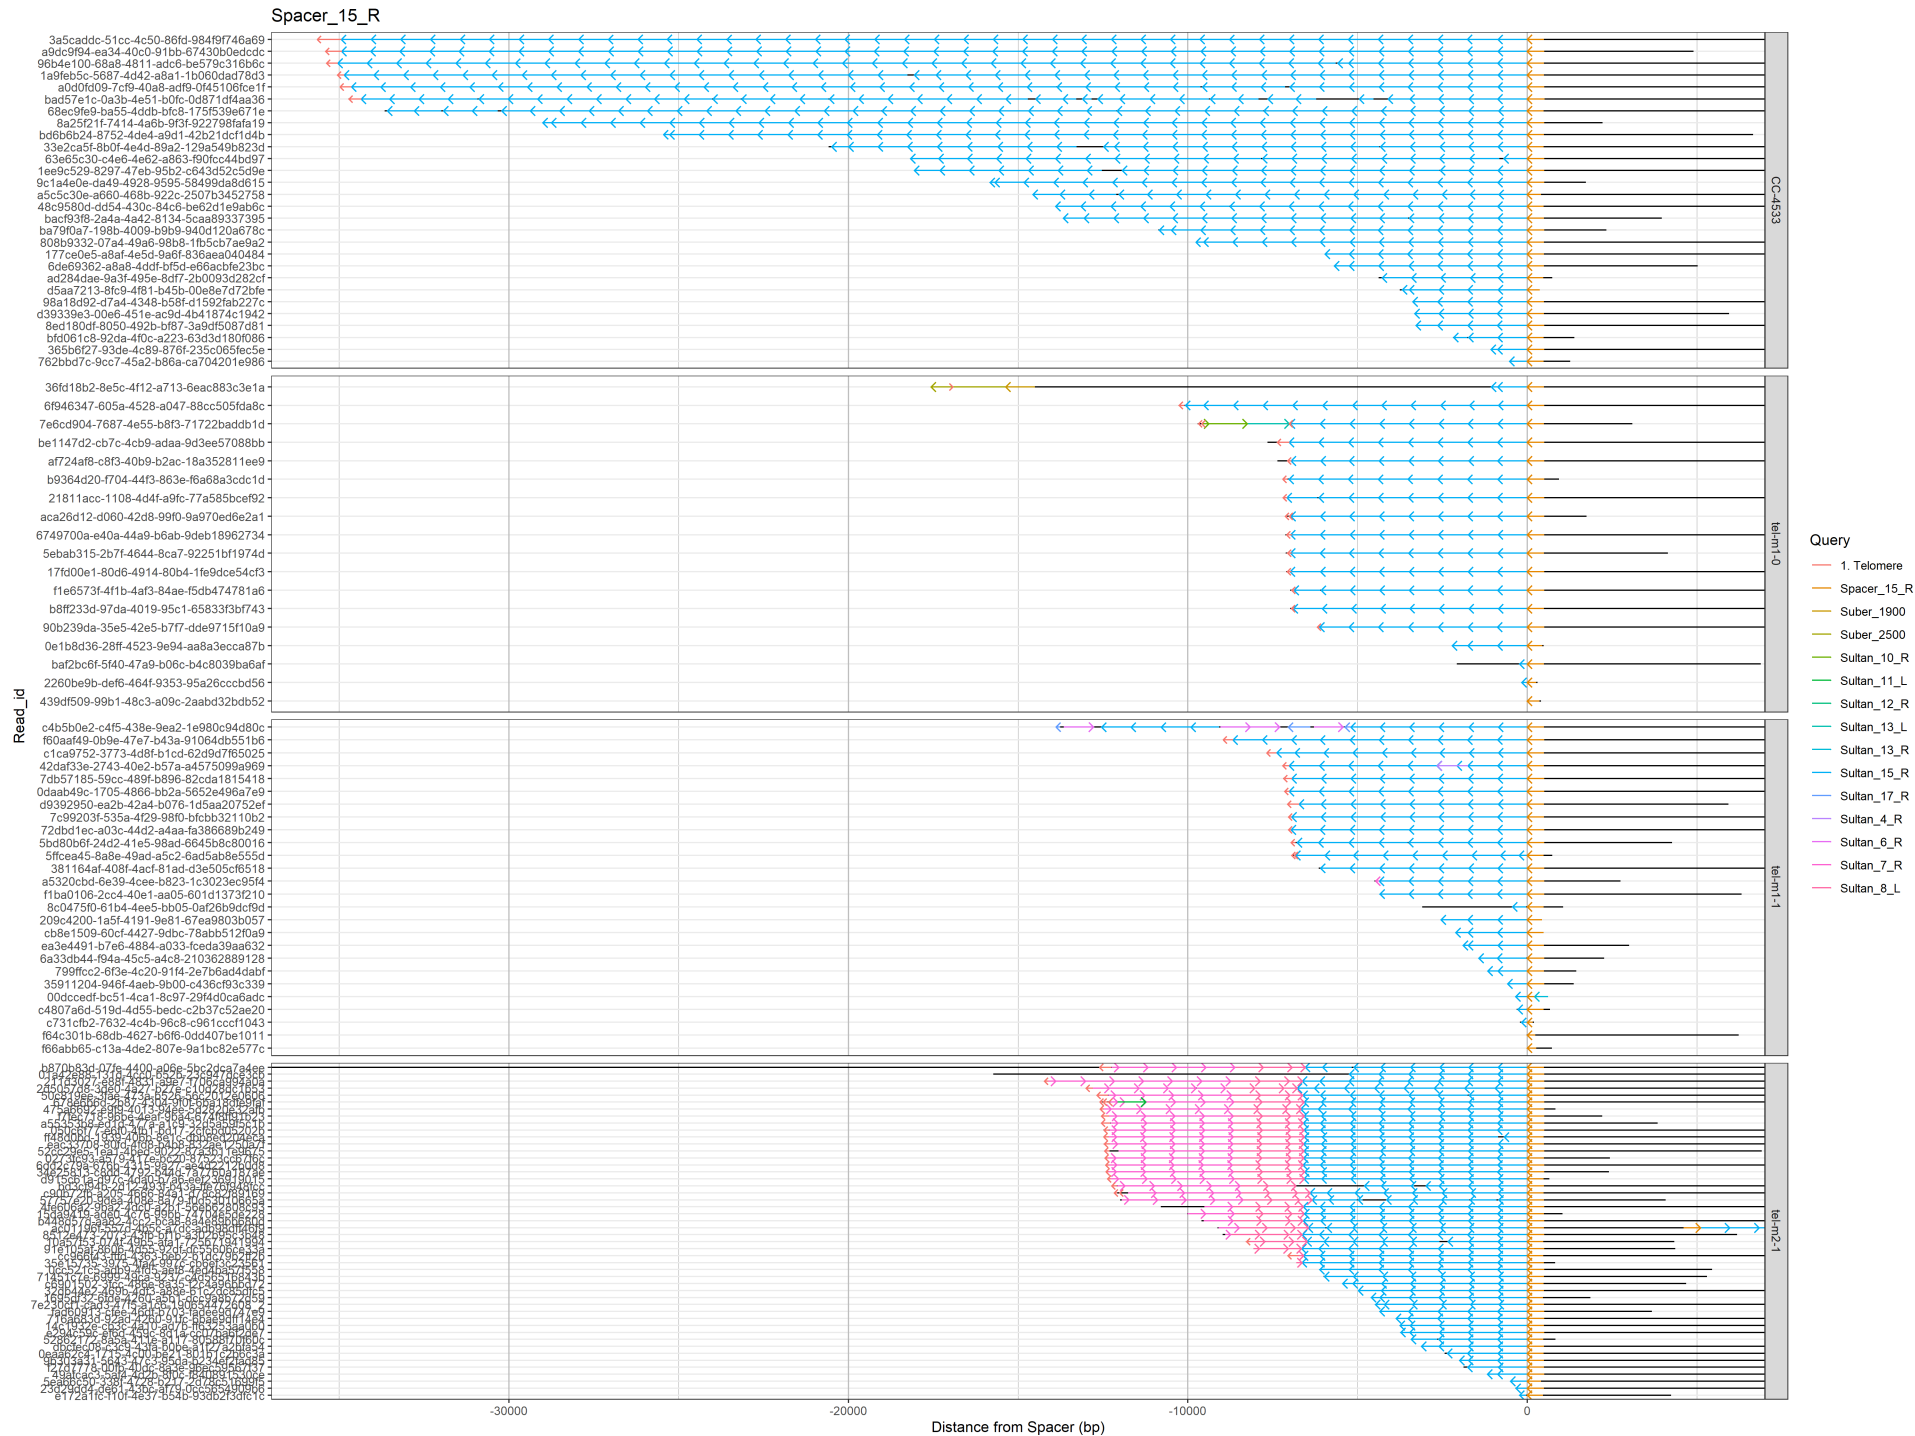

# Spacer\_16\_L

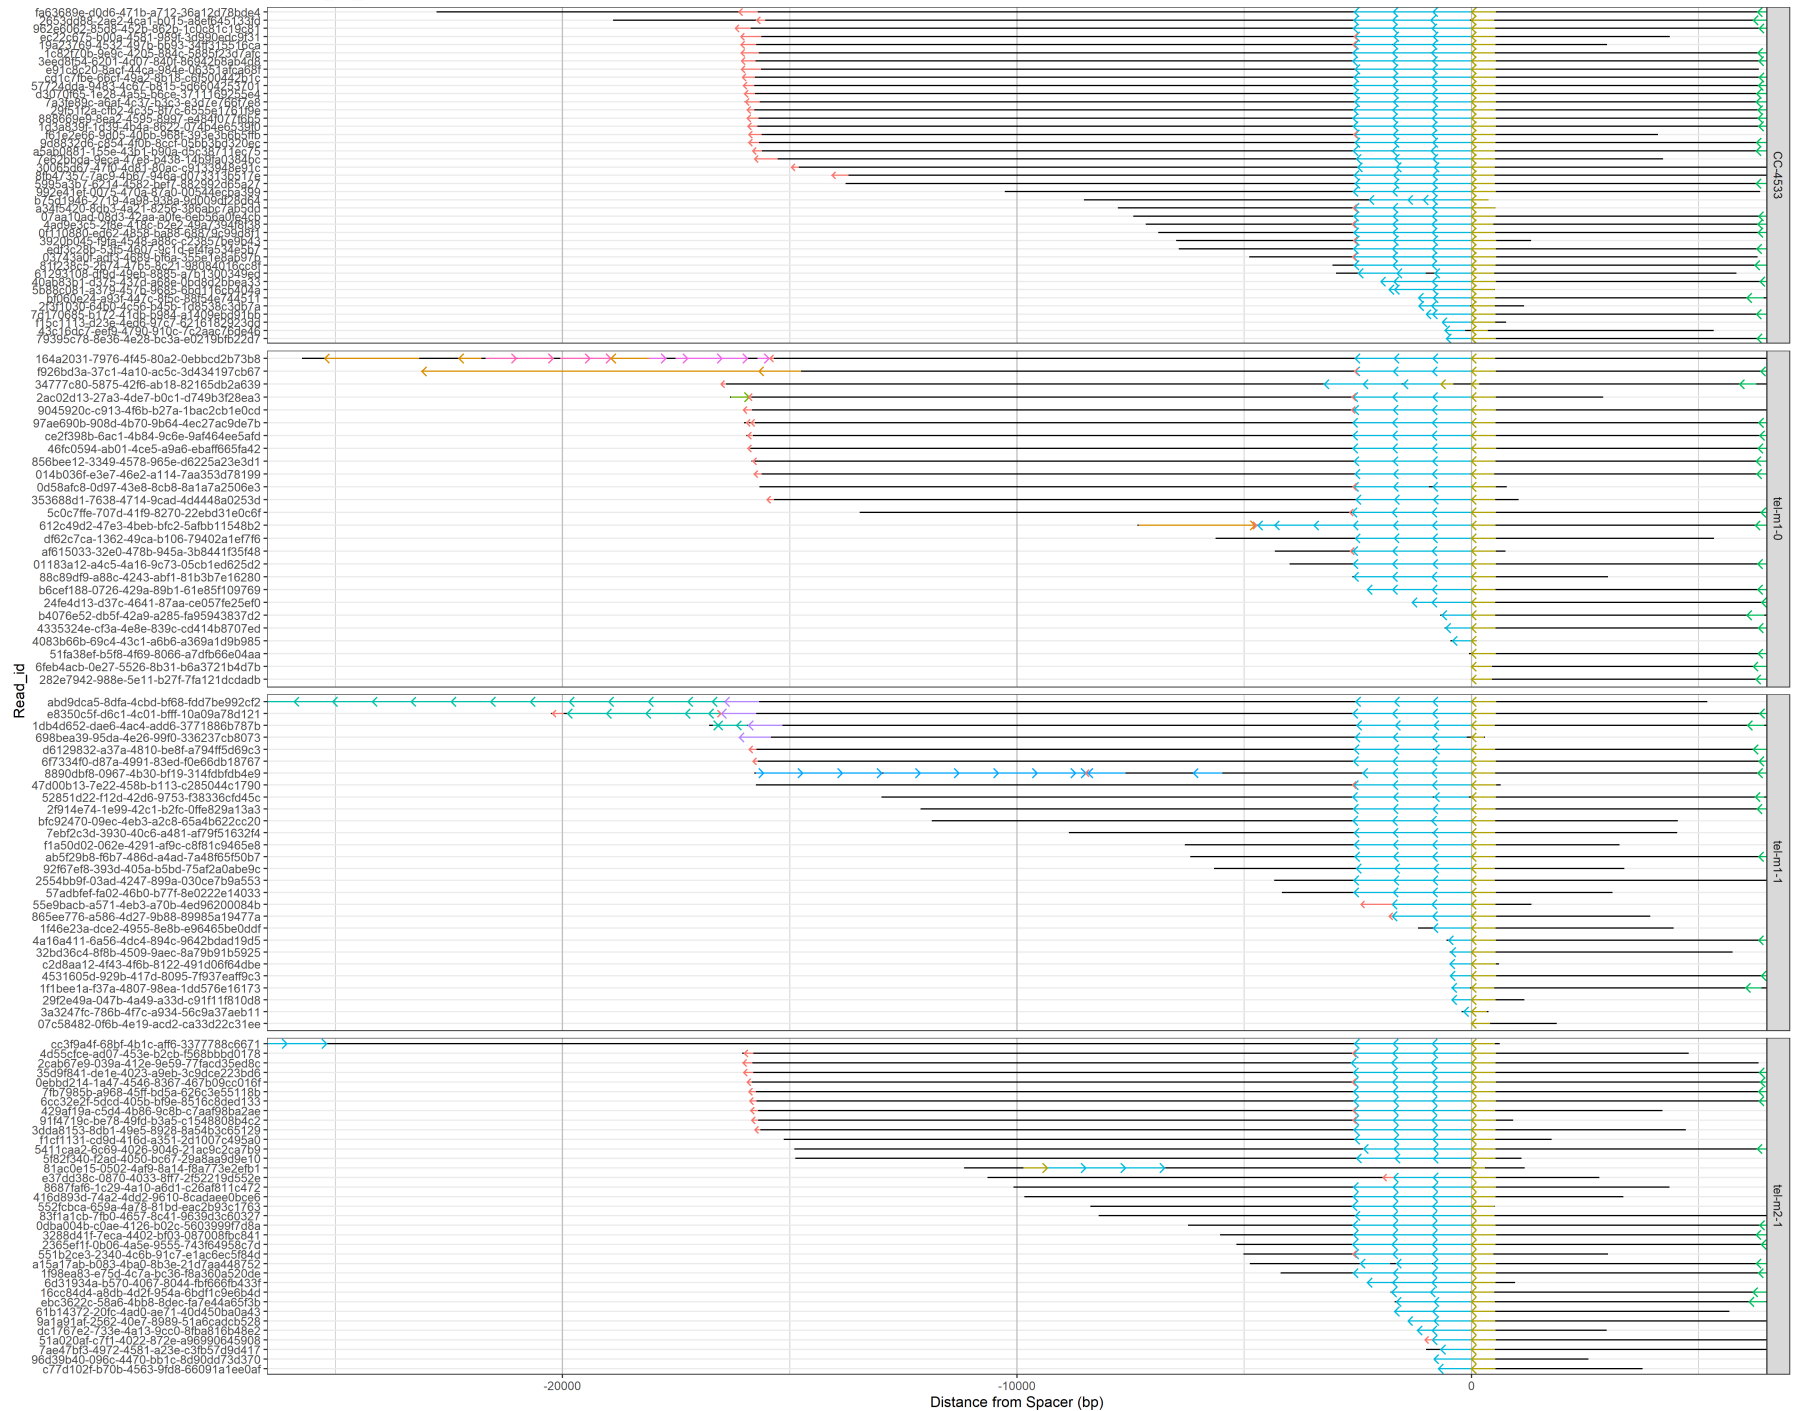



Spacer\_16\_R

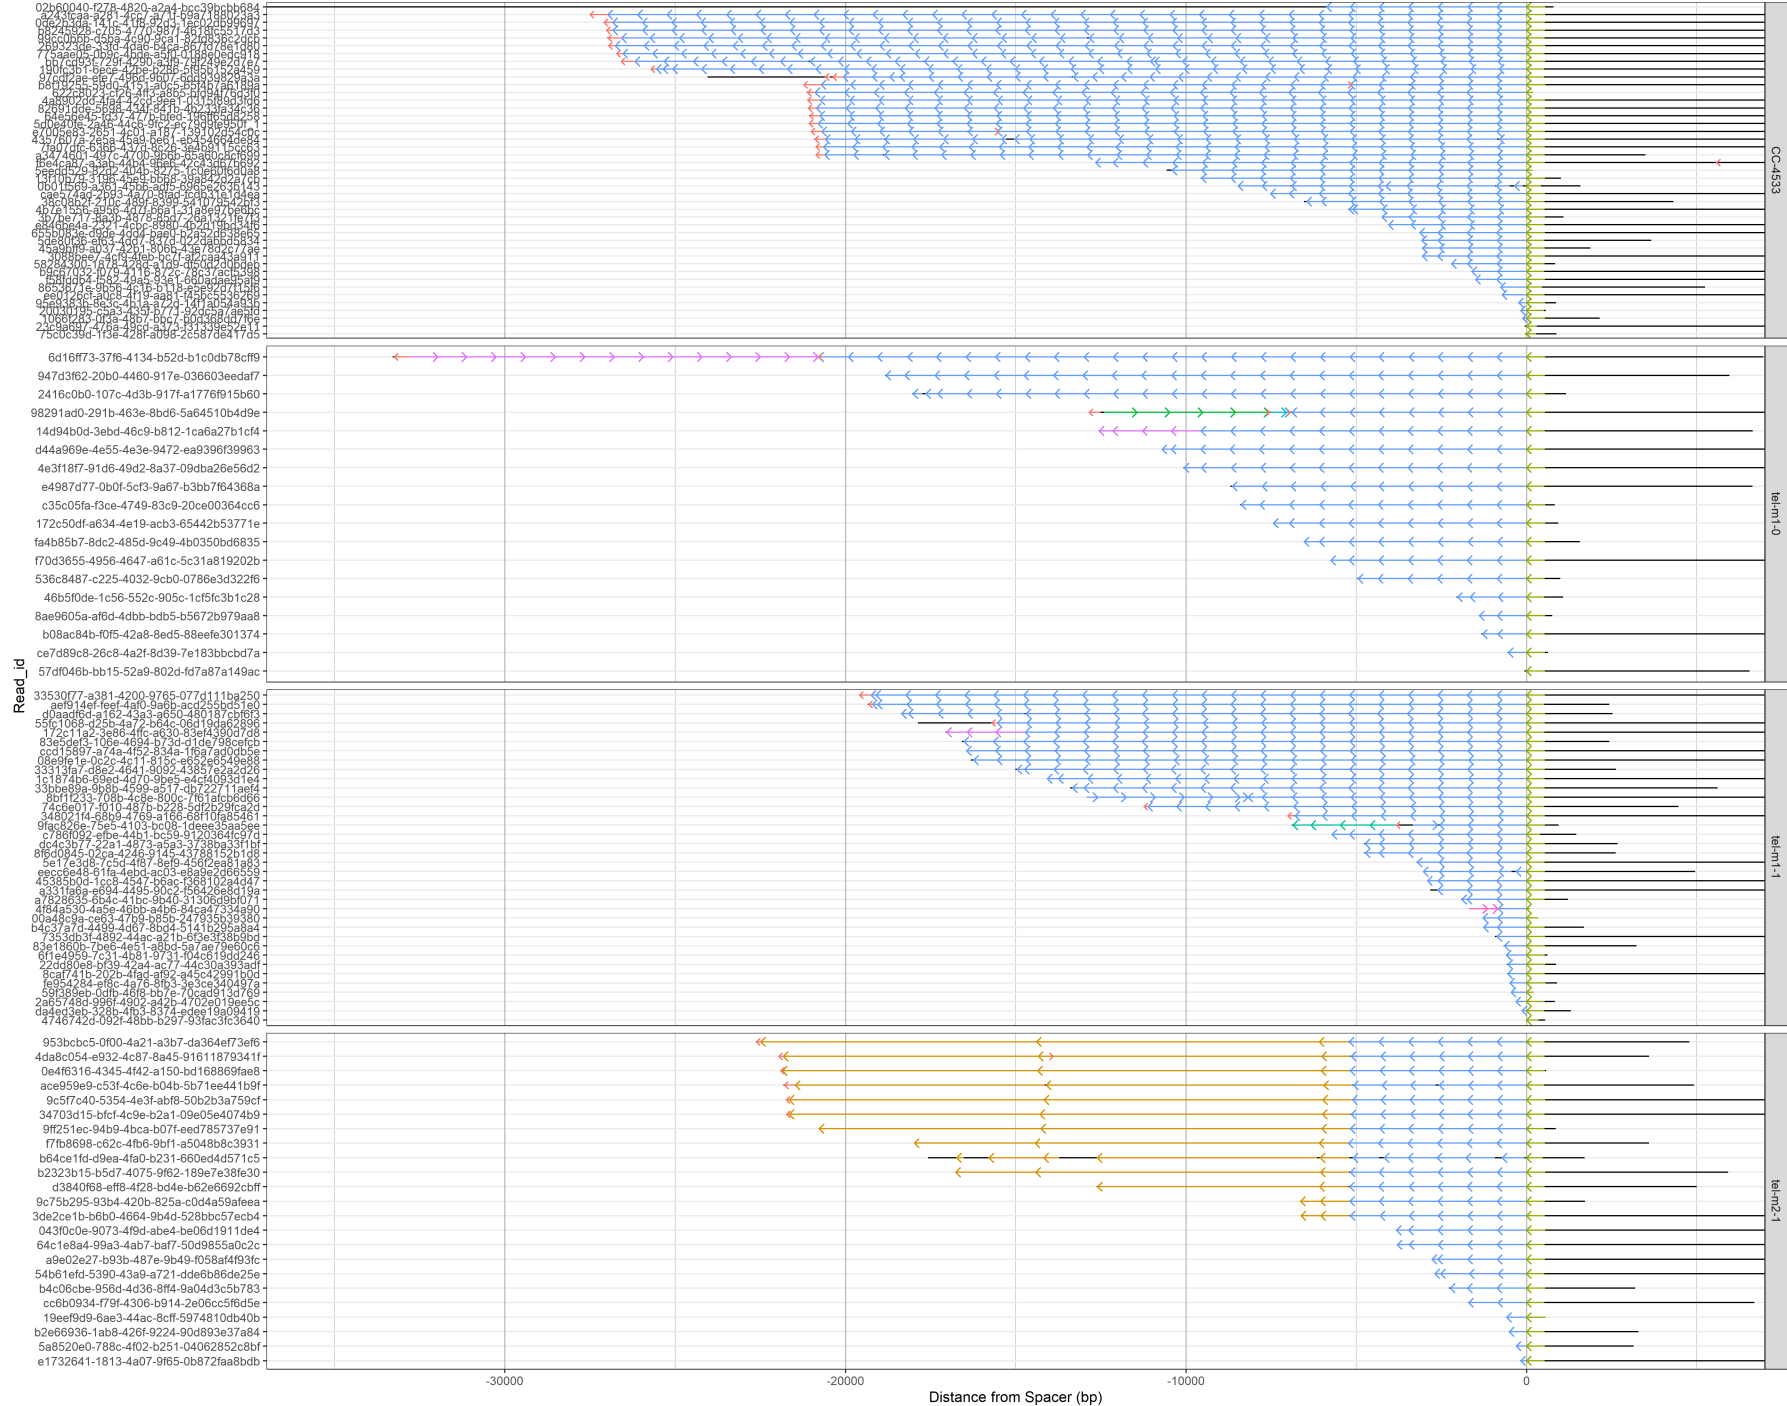

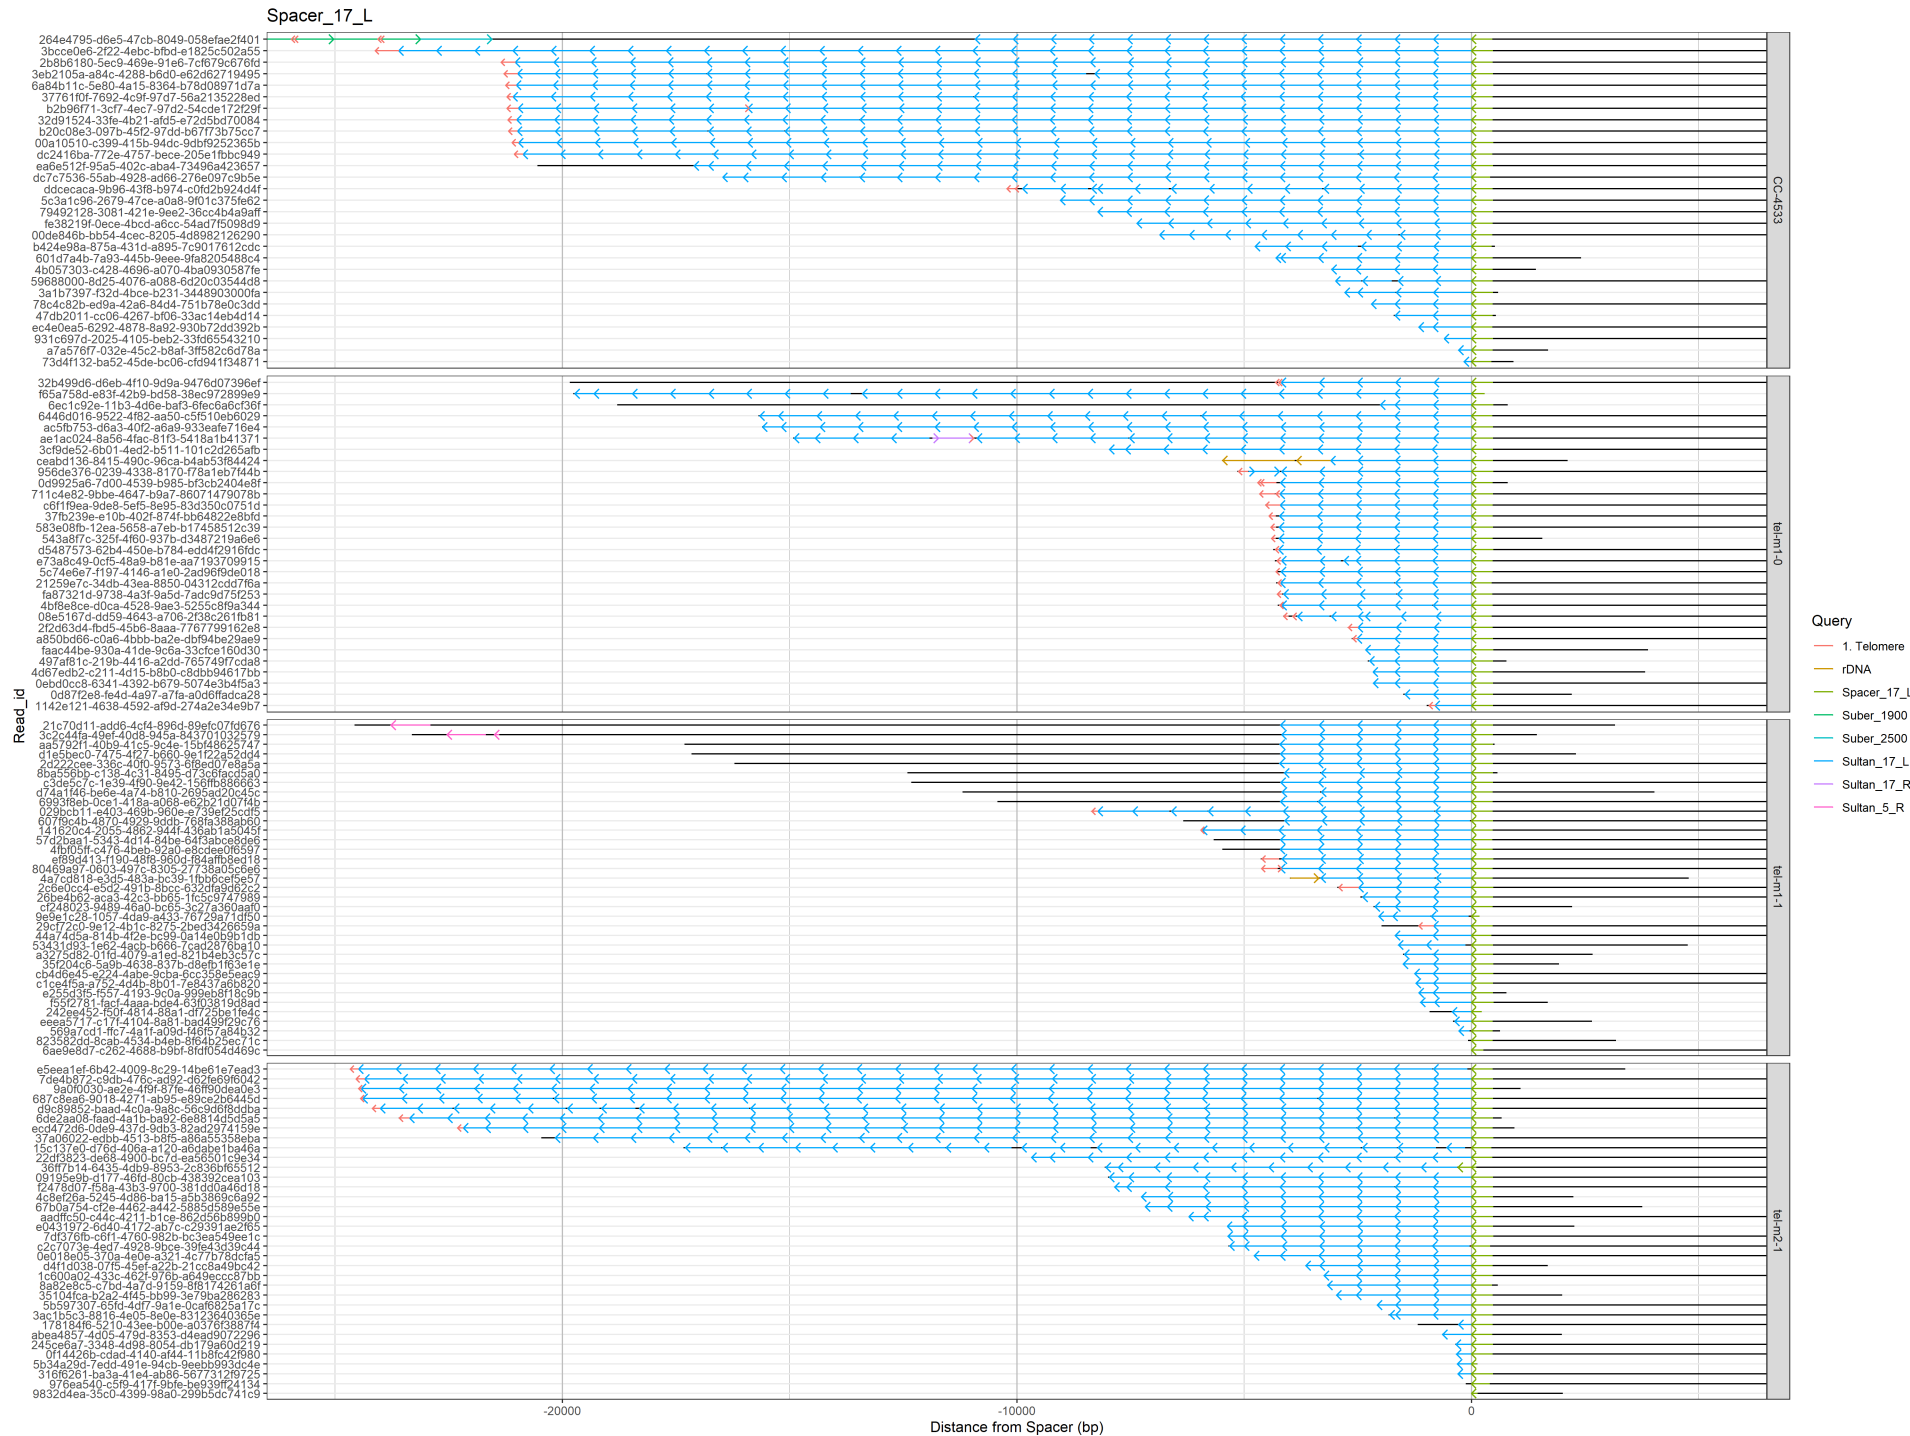

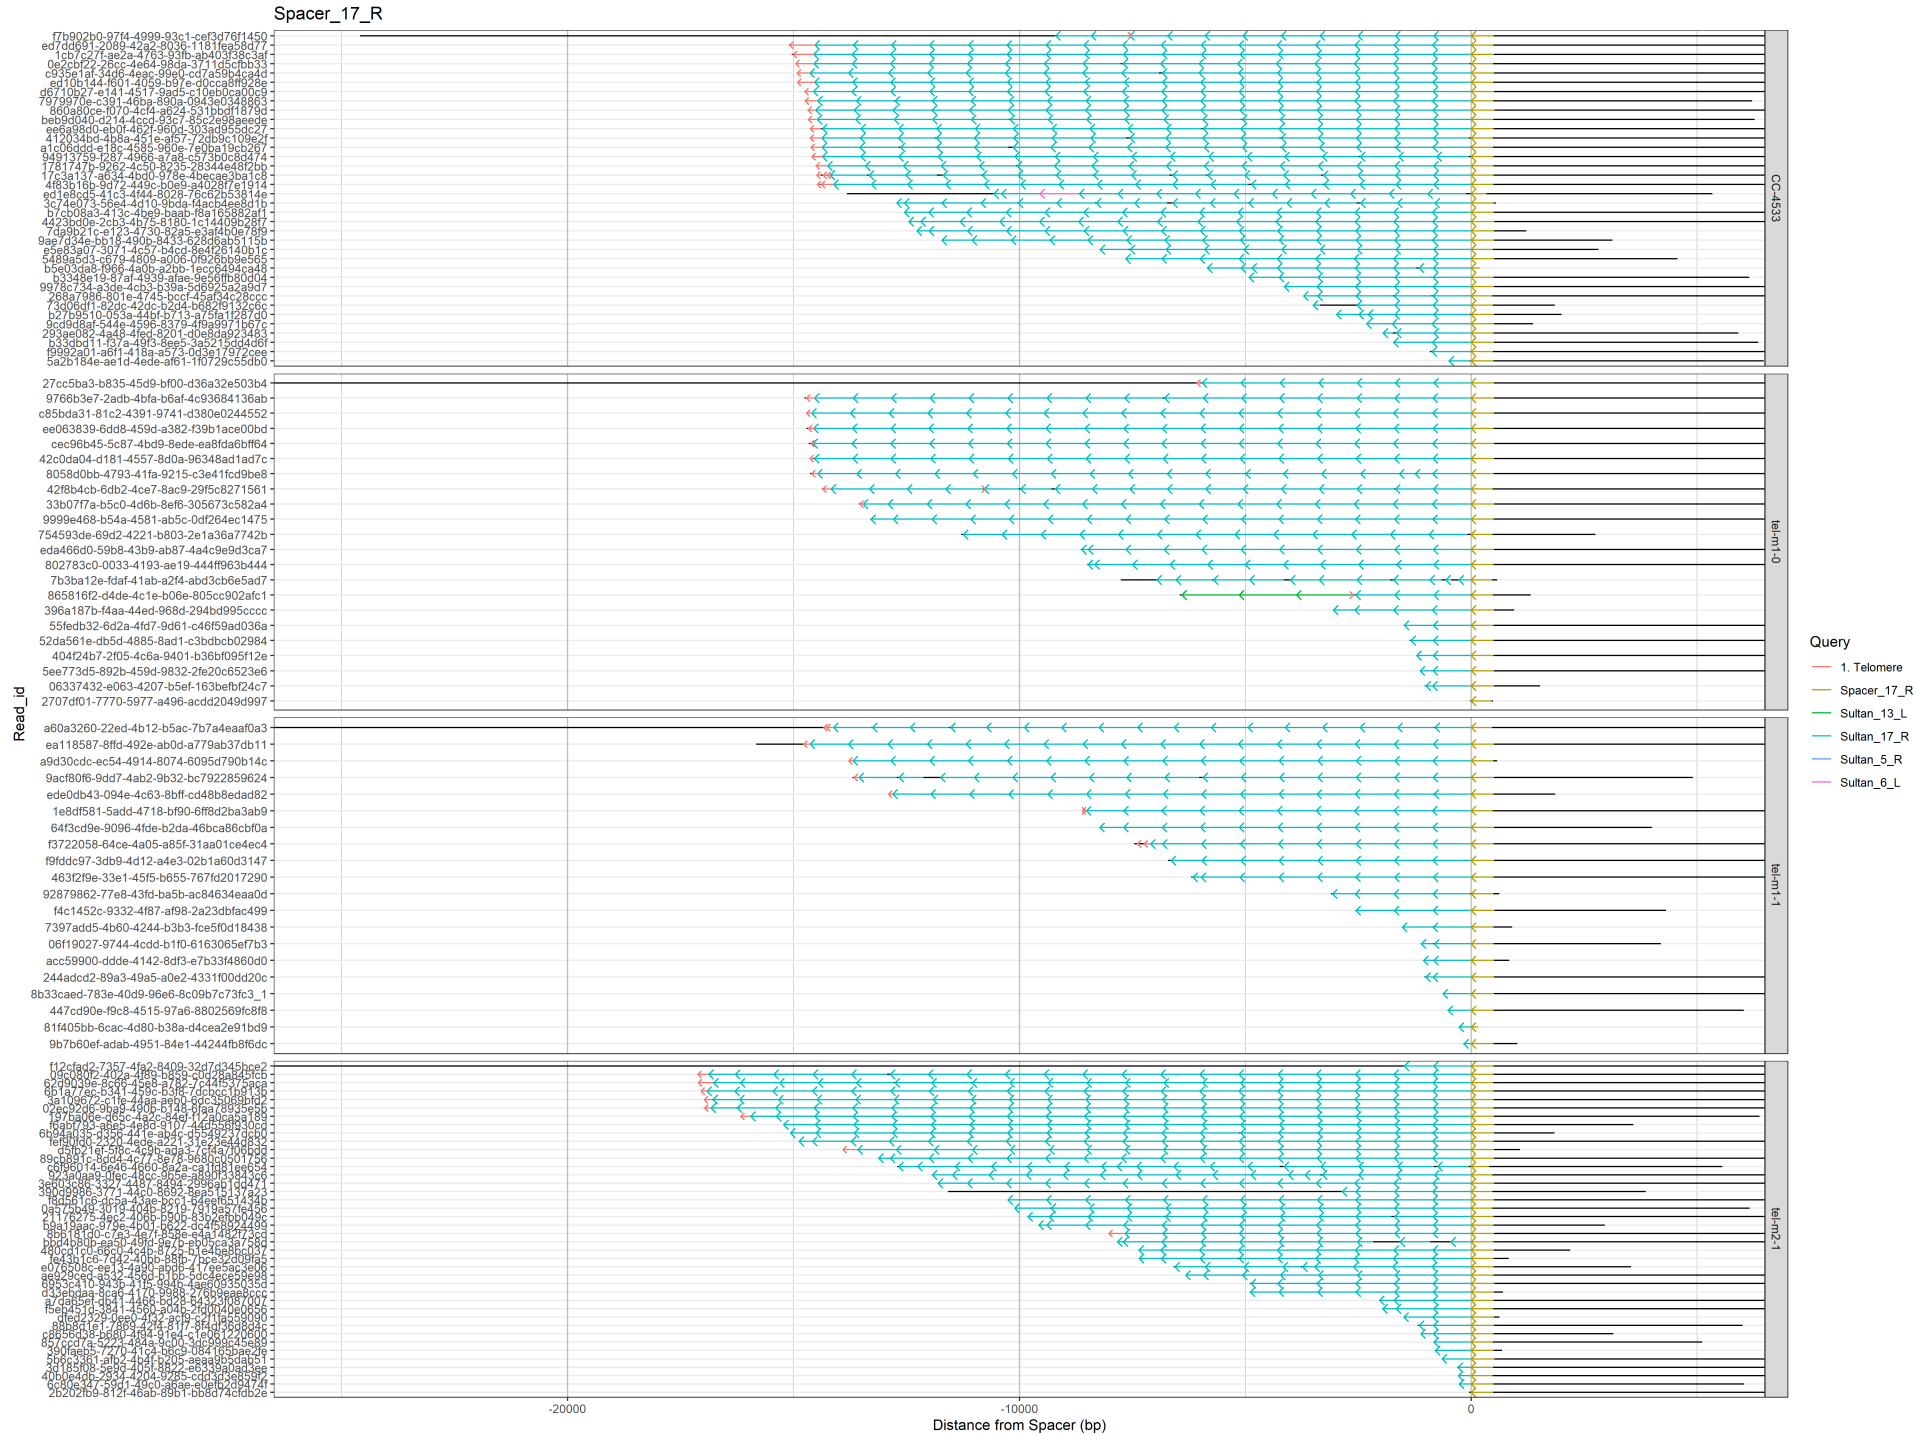

Supplement: Supplemental_Dataset1.pdf [file Supplemental_Dataset1.pdf]
