# Supplementary material for: Telomerase-independent survival leads to a mosaic of complex subtelomere rearrangements in Chlamydomonas reinhardtii
Source: HighWire-hosted journal article supplement (doi:10.1101/gr.278043.123), 2023-08-14
Supplement: Supplemental_Material_.pdf [file Supplemental_Material_.pdf]

## Supplemental Material

**Title: Telomerase-independent survival leads to diverse and complex subtelomere rearrangements in *Chlamydomonas reinhardtii***

Frédéric Chaux<sup>1,3</sup>, Nicolas Agier<sup>1,\*</sup>, Clotilde Garrido<sup>1,\*</sup>, Gilles Fischer<sup>1</sup>, Stephan Eberhard<sup>2</sup> and Zhou Xu<sup>1</sup>

### **Affiliations:**

<sup>1</sup>Sorbonne Université, CNRS, UMR7238, Institut de Biologie Paris-Seine, Laboratory of Computational and Quantitative Biology, 75005 Paris, France

<sup>2</sup>Sorbonne Université, CNRS, UMR7141, Institut de Biologie Physico-Chimique, Laboratory of Chloroplast Biology and Light-Sensing in Microalgae, 75005 Paris, France

<sup>3</sup>present address: Laboratory for Marine and Atmospheric Biogeochemistry, Ruđer Bošković Institute, 10000 Zagreb, Croatia

\*These authors made equal contributions to this work.

1 [Table of Contents](#)

2

3 **Supplemental Table 1. CC-4533 and telomerase mutants Nanopore sequencing statistics.**

4 **Supplemental Table 2. Assembly-level statistics for CC-4533 and telomerase mutants.**

5 **Supplemental Figure S1. The long-term culture of wild-type CC-4533 shows little rearrangements**  
6 **compared to CC-1690.**

7 **Supplemental Figure S2. Analysis of SVs in the genome assemblies.**

8 **Supplemental Figure S3. Analysis of telomere length at the read level.**

9 **Supplemental Figure S4. Stabilized and unstable *Sultan* arrays.**

10 **Supplemental Figure S5. Some *Sultan* and *Suber* arrays shorten progressively until complete**  
11 **degradation.**

12 **Supplemental Figure S6. Complex multistep rearrangements at chromosome extremities.**

13 **Supplemental Figure S7. New telomere-capped extremities and junction sequences.**

14 **Supplemental Figure S8. Methylation frequency of other chromosome regions and extremities.**

15 **Supplemental Dataset 1. *Spacer*-based analysis of subtelomeres.**

16 **Supplemental Code. Code and associated files for TeloReader.**

17

| Strain                 | Read count | Total Gb | Depth | Mean read length (kb) | N50 (kb) |
|------------------------|------------|----------|-------|-----------------------|----------|
| <b>CC-4533</b>         | 541 694    | 5.42     | 35×   | 10.0                  | 19.9     |
| <b><i>tel-m1-0</i></b> | 308 009    | 3.23     | 25×   | 10.5                  | 24.1     |
| <b><i>tel-m1-1</i></b> | 917 886    | 4.78     | 35×   | 5.2                   | 14.3     |
| <b><i>tel-m2-1</i></b> | 381 156    | 4.18     | 35×   | 11.0                  | 19.9     |

**Supplemental Table 1. CC-4533 and telomerase mutants Nanopore sequencing statistics.** Shown are the “passed” datasets (read quality score >7). “N50” is the median read length weighted by base count.

| Strain   | Assembler   | Genome size (Mb) | Count of contigs | N50 (Mb) | Contig length (kb) |         |         |           |       |       |
|----------|-------------|------------------|------------------|----------|--------------------|---------|---------|-----------|-------|-------|
|          |             |                  |                  |          | Minimum            | Average | Maximum | Quartiles |       |       |
| CC-4533  | Canu        | 117.7            | 88               | 6.1      | 16                 | 1,337   | 10,184  | 54        | 100   | 1,606 |
|          | NextDenovo  | 114.0            | 54               | 6.1      | 26                 | 2,112   | 11,858  | 237       | 605   | 3,220 |
|          | SMARTdenovo | 114.6            | 109              | 2.0      | 13                 | 1,052   | 5,141   | 189       | 698   | 1,537 |
| tel-m1-1 | Canu        | 121.7            | 248              | 2.4      | 2                  | 491     | 8,057   | 26        | 52    | 290   |
|          | NextDenovo  | 116.8            | 71               | 3.6      | 15                 | 1,645   | 12,157  | 155       | 807   | 2,358 |
|          | SMARTdenovo | 119.9            | 138              | 2.7      | 12                 | 869     | 7,197   | 59        | 194   | 1,000 |
| tel-m2-1 | Canu        | 118.3            | 162              | 3.6      | 3                  | 730     | 9,721   | 40        | 71    | 624   |
|          | NextDenovo  | 113.7            | 59               | 3.6      | 14                 | 1,927   | 9,884   | 207       | 1,015 | 3,109 |
|          | SMARTdenovo | 114.2            | 106              | 3.2      | 17                 | 1,077   | 7,623   | 80        | 239   | 1,416 |

**Supplemental Table 2. Assembly-level statistics for CC-4533 and telomerase mutants.** The assembly statistics for each strain using 3 assemblers (Canu, NextDenovo and SMARTdenovo) are shown. The displayed N50 corresponds to the contig N50. For each chromosome, the assembly giving the most colinear structure with CC-1690 was selected to build the genome model.



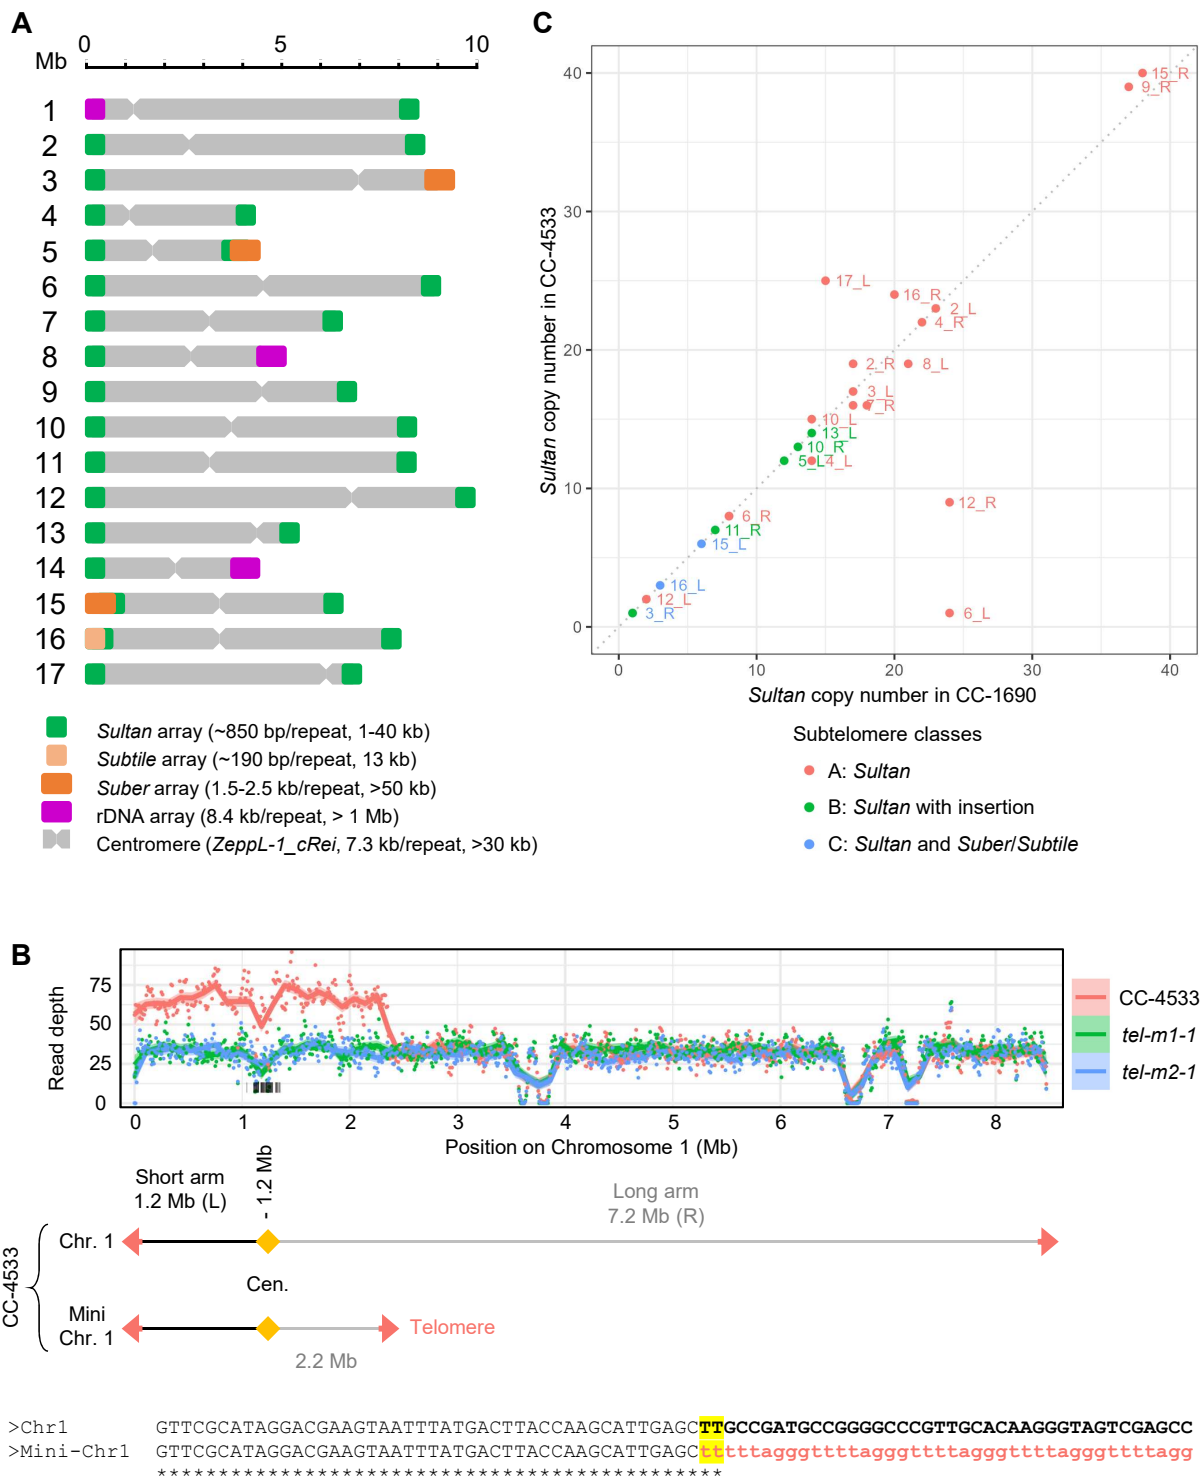

**Supplemental Figure S1. The long-term culture of wild-type CC-4533 shows little rearrangements compared to CC-1690. (A)** Schematic representation of all 17 chromosomes of *C. reinhardtii* and the composition of their subtelomeres. Chromosomes are drawn at scale, but not the subtelomeres. **(B)** Duplication of a centromere-containing fragment of Chromosome 1 in the long-term culture of CC-4533, termed “mini-Chromosome 1”. *(Upper part)* Read depth of the indicated strains over

1 Chromosome 1, with the doubled coverage for CC-4533 between 0 and 2.2 Mb. (*Middle part*)  
2 Schematic representation of mini-Chromosome 1. (*Lower part*) Junction sequence to the new telomere  
3 on the right arm of mini-Chromosome 1, with a 2-bp microhomology highlighted in yellow. (C)  
4 Comparison between the *Sultan* copy number at each class A, B and C subtelomere between the  
5 CC-1690 and the long-term culture of CC-4533.

6

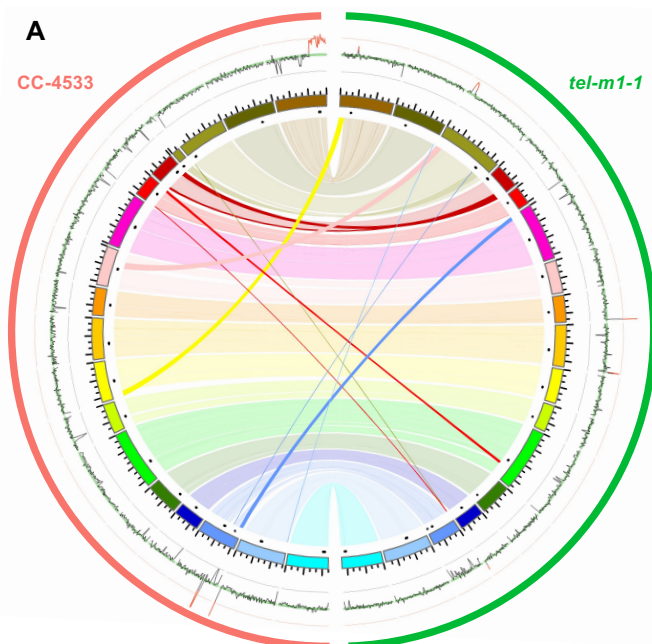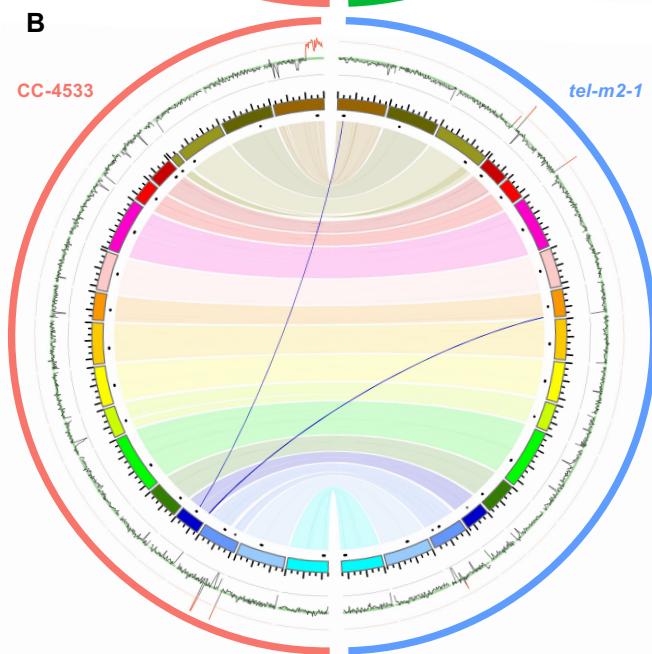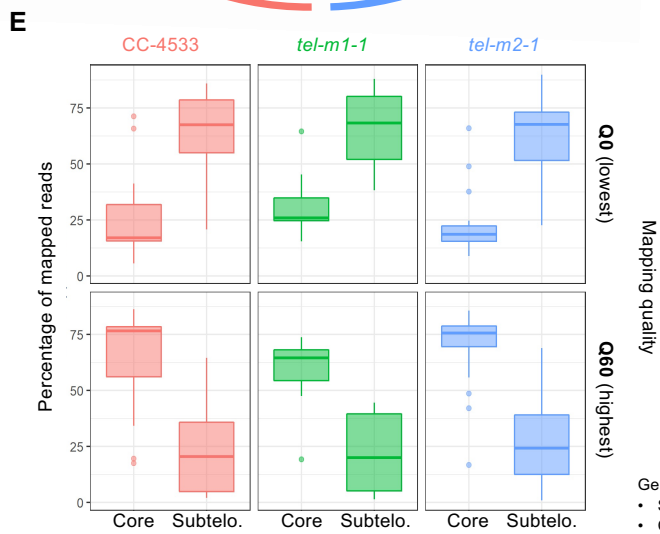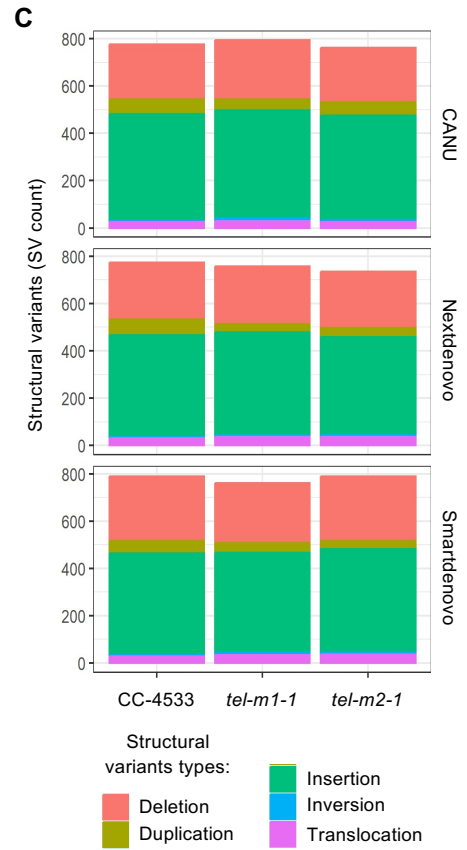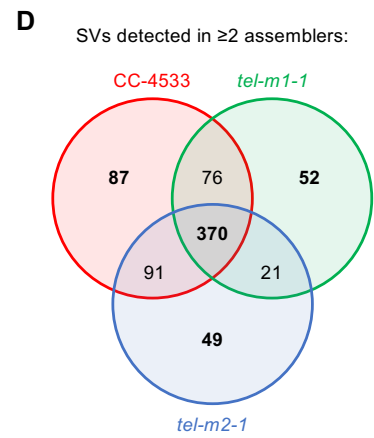

Strain-specific SVs:

|          | Count | Median (bp) |
|----------|-------|-------------|
| CC-4533  | 87    | 220         |
| tel-m1-1 | 52    | 555         |
| tel-m2-1 | 49    | 30          |

SVs found in  $\geq 2$  strains :

|                  | Count | Median (bp) |
|------------------|-------|-------------|
| $\geq 2$ strains | 558   | 180         |

Genomic regions:

- Subtelomere: < 50 kb from chromosomes ends
- Core: > 50 kb from chromosomes ends

**Supplemental Figure S2. Analysis of SVs in the genome assemblies.** (A) Two-way Circos plot representation of chromosome-scale SVs between CC-4533 and *tel-m1-1*, as already displayed in [Fig. 1C](#). (B) Same as (A) for CC-4533 and *tel-m2-1*. (C) Count of SVs of the indicated types detected by MUM&Co in the assemblies of CC-4533, *tel-m1-1* and *tel-m2-1*, obtained from 3 assemblers (Canu, NextDenovo and SMARTdenovo), and compared to CC-1690. (D) Venn diagram representation of unique and common SVs detected in the 3 strains, for SVs found in the genomes built by at least 2 assemblers. The tables give the median size of the SVs. (E) Boxplots of the percentage of reads of the lowest mapping quality (Q0) and of the highest (Q60), for reads mapping to subtelomeres and the rest of the genome.

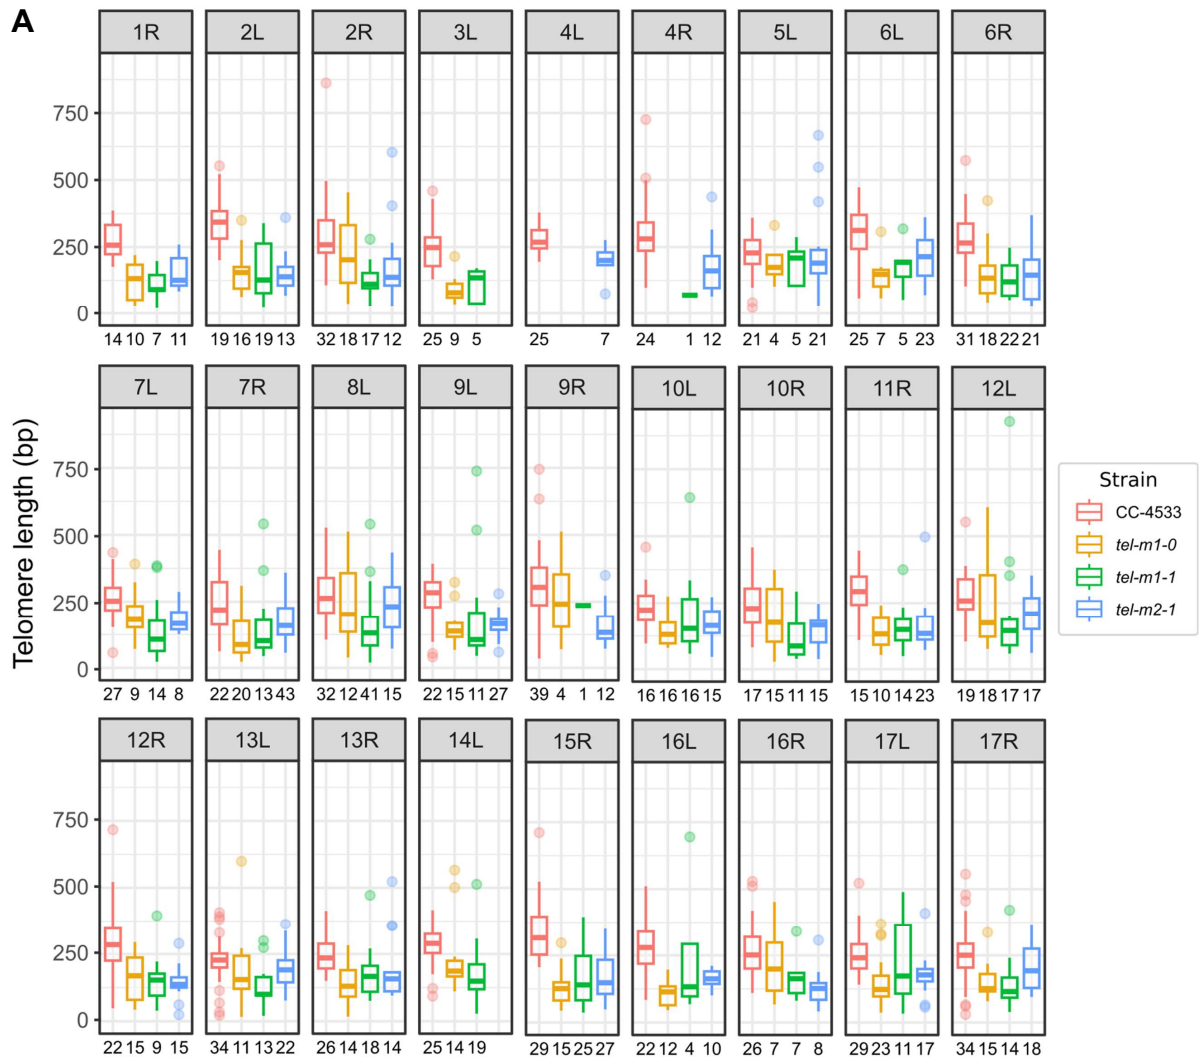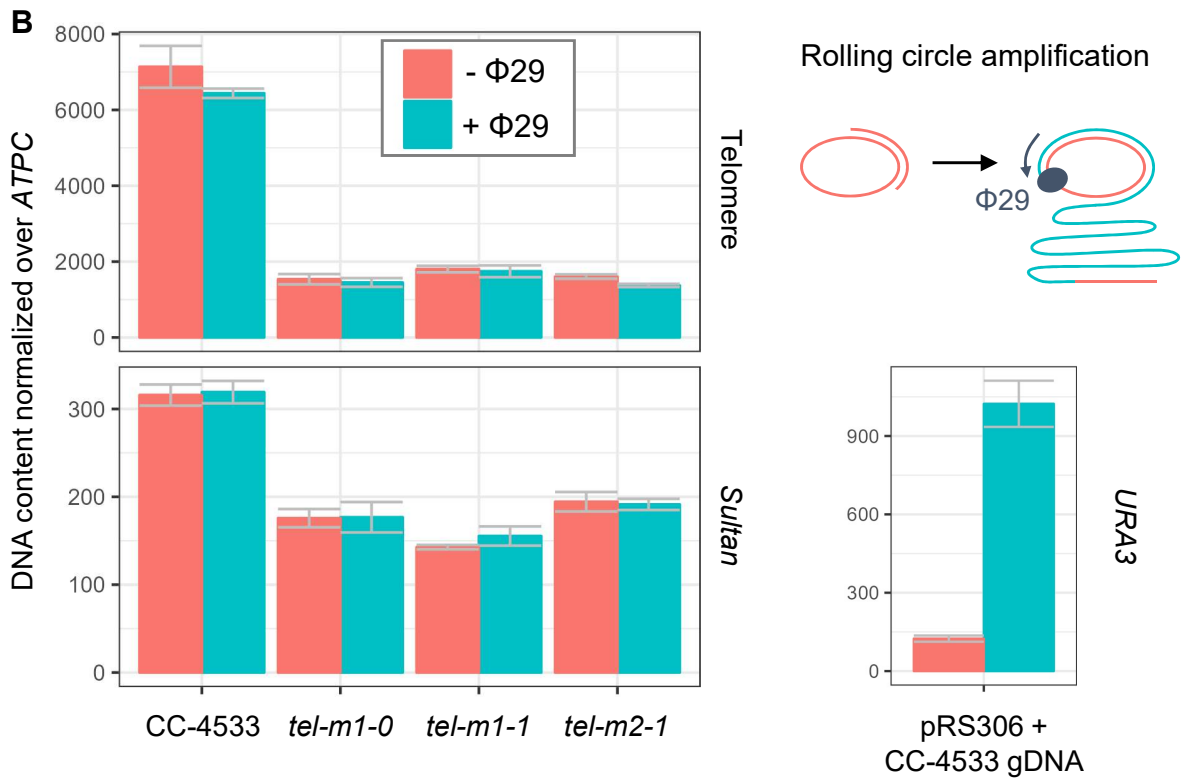

**Supplemental Figure S3. Analysis of telomere length at the read level.** (A) Telomere length distribution for each *Sultan* subtelomere, *i.e.* each uniquely identifiable class A and class B subtelomere is represented as a boxplot for each indicated strain. The number of corresponding reads is indicated under the boxes. (B) Rolling circle amplification assay performed on CC-4533 and the telomerase mutant samples, based on  $\phi$ 29-dependent amplification of partially single-stranded or nicked DNA circles as illustrated in the top right. Telomeric and *Sultan* contents were measured by qPCR, adjusted for genomic DNA quantity by using the single-copy gene *ATPC*. Each bar represents the mean normalized value derived from qPCR measurements (performed in triplicates) of  $n = 3$  independent  $\phi$ 29 or no- $\phi$ 29 reactions and the error bar indicates the standard deviation. As a positive control, the plasmid pRS306 containing the *URA3* gene was spiked into CC-4533 genomic DNA and its quantity was measured by qPCR targeting *URA3*.

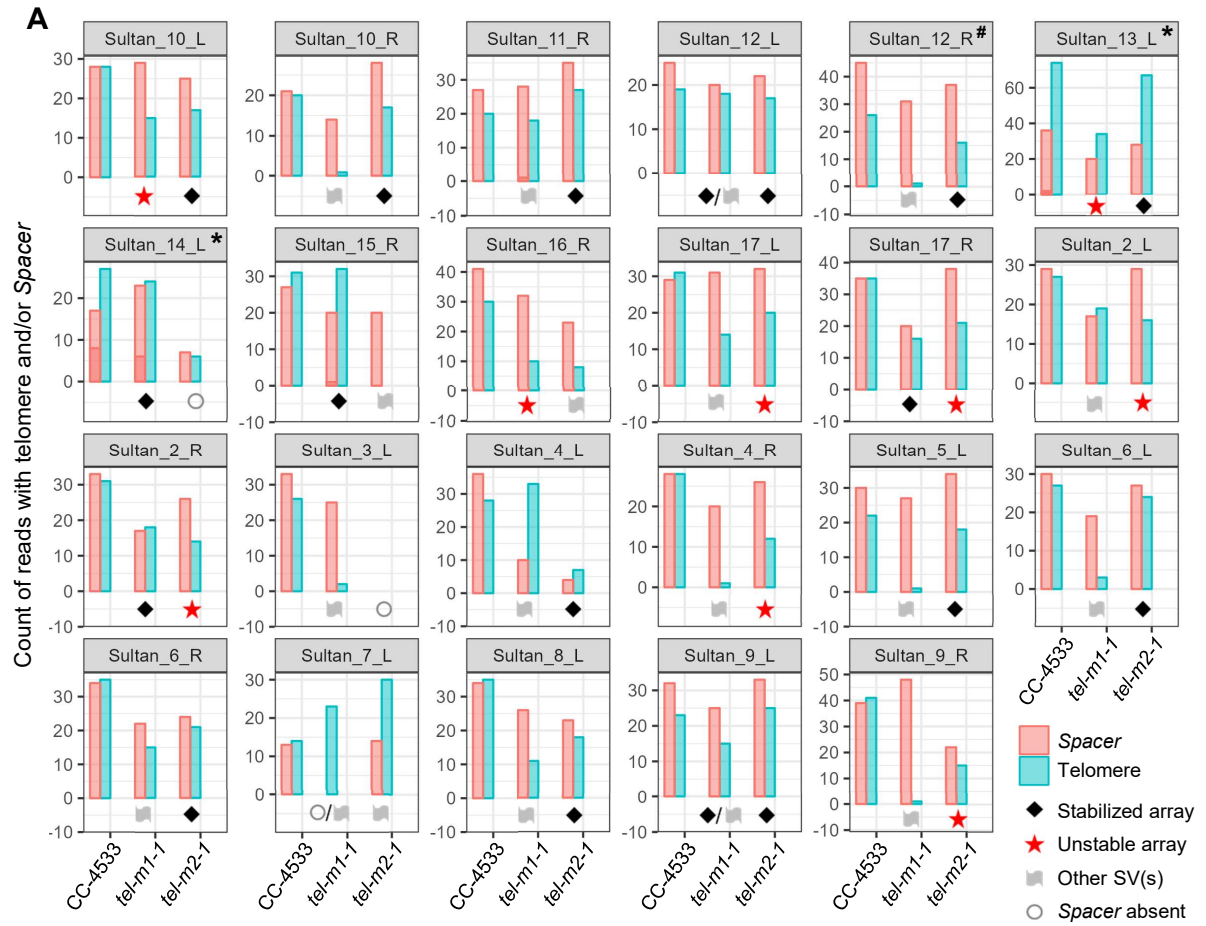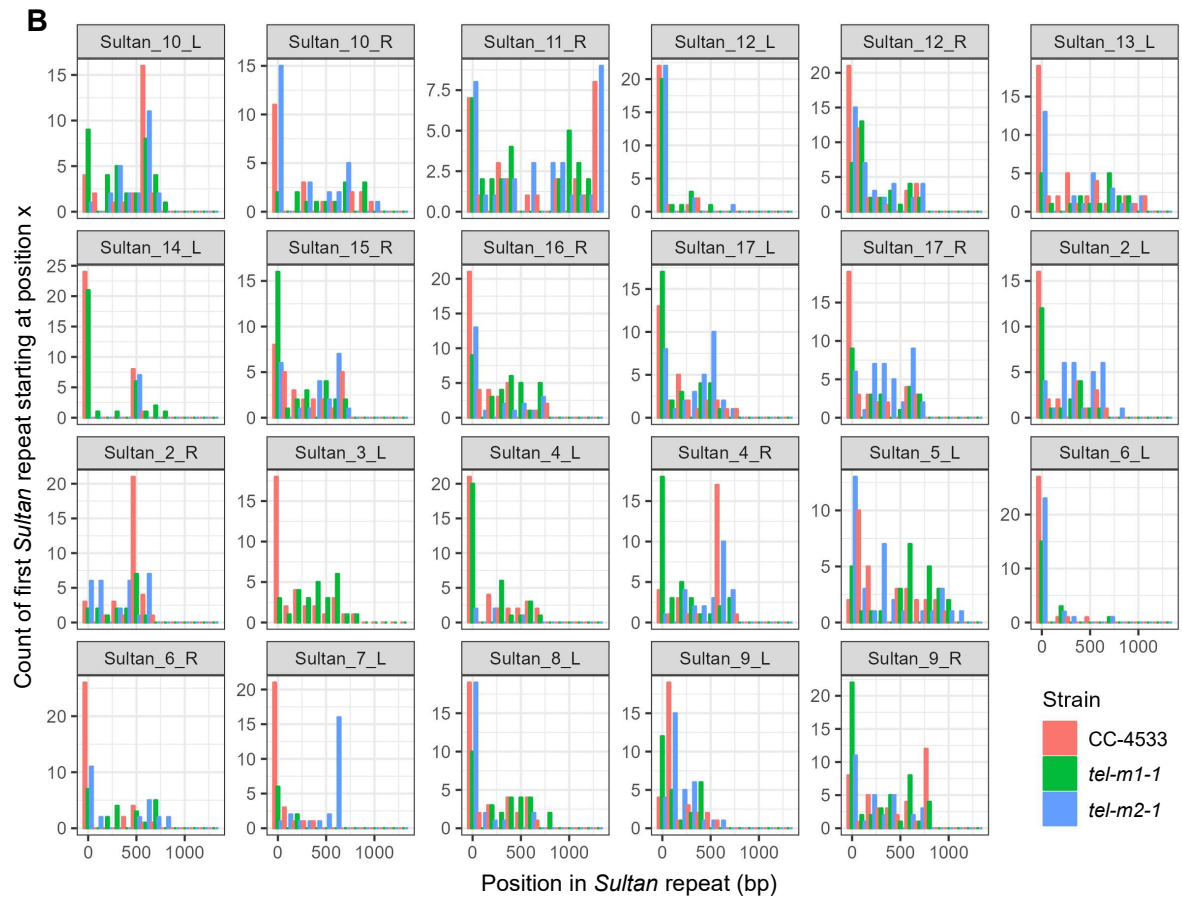

**Supplemental Figure S4. Stabilized and unstable *Sultan* arrays.** (A) For the indicated class A and B *Sultan* arrays, the number of reads containing both a telomere sequence and *Sultan* elements is indicated as a blue bar. The number of reads containing both the *Spacer* element and *Sultan* elements is shown as a red bar. In CC-4533, the near equality between these two numbers for most subtelomeres strongly suggests that each of these subtelomeres, starts with a *Spacer* and ends with a telomere sequence at the individual DNA molecule level. It is mostly the case also for stabilized *Sultan* arrays in the mutants, marked by a black diamond. In contrast, unstable *Sultan* arrays (red star) nearly always show more *Spacer-Sultan* reads than telomere-*Sultan* reads, suggesting that the chromosome extremity ends with a *Sultan* element. Subtelomeres with additional SVs (gray flag) cannot be subjected to this analysis. Circles indicate the partial loss or complete absence of *Spacer* sequence. \*For 13L and 14L, the *Sultan* element was found associated with 2 distinct *Spacer* elements (light and dark red parts of the histogram); besides, both subtelomeres are from class B, thus their *Sultan* elements contain insertions that might map elsewhere in the genome close to ITS, hence the high number of telomeres associated with the *Sultan*. \*\*Subtelomere 12R contains two identical *Spacer* sequences, thus increasing the count of *Sultan* reads associated with a *Spacer* (see also Supplemental Dataset 1). (B) Distribution of the position of telomere-*Sultan* transition in the first *Sultan* for stabilized *Sultan* arrays or of the first *Sultan* element in unstable arrays, in CC-4533, *tel-m1-1* and *tel-m2-1*.



## A Subtelomere 7L

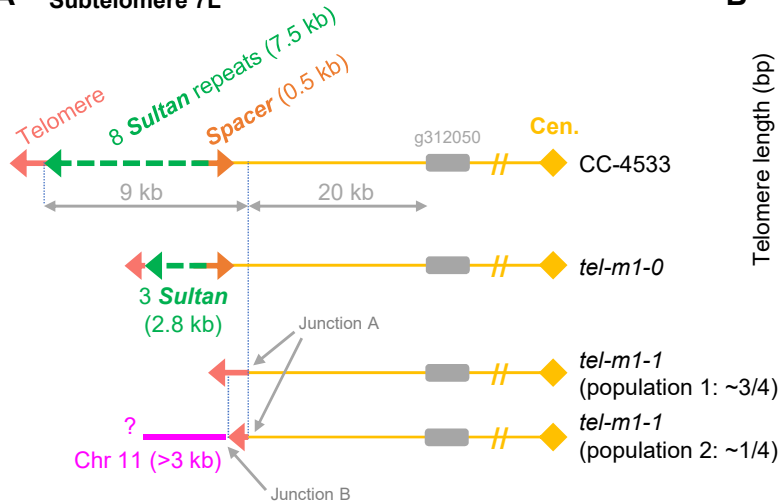

## B

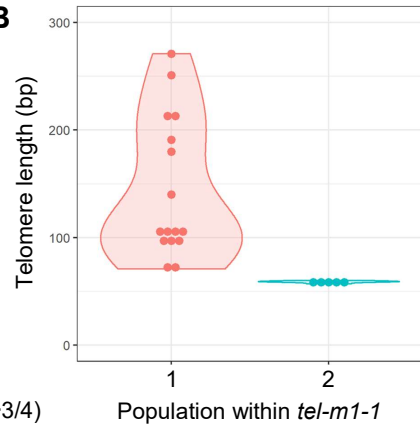

## C

Junction A (population 1 within *tel-m1-1*)

```
>042d5ee2-78f1-4bc0-9303-460a02d4c0a
>20b0ca70-ab0d-42a5-b26d-a4b5e021ec9c
>0d0c9960-bede-4236-971e-ee0198755db
>56ca366b-57c5-403a-8bb6-15564d374216
>80136a5f-bfe1-4474-98ea-049823973a84
>0f4ec659-56c6-4a12-87ab-d2936f700e5
>96607824-8397-488b-ad70-63b643379c0d
>342f8aee-36d0-45a6-8c30-a45619971a92_1
>431340ab-f168-4894-98c3-505e0a73757f
>_rev_a68c6a1b-ada3-43c9-96bf-364bbf28083b
>_rev_c05a6644-01c0-4cc3-bb74-b22a91444bb8
>_rev_342f8aee-36d0-45a6-8c30-a45619971a92_2
>_rev_63f7f6d0-95f1-4984-813c-ac1e2324b98a
>_rev_9b4d339a-2040-49c7-adf9-3f6702c1c009
>_rev_9782b286-4e54-4ba1-a66e-41430a0c01
>_rev_f9a8a35-7f74-4be1-99b8-12890a8230cc
>chr7_WT
```

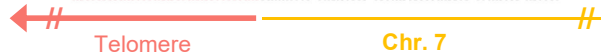

Junction B (population 2 within *tel-m1-1*)

```
>chr7_WT
>99f74c3-4927-4c2d-baa8-bc33a532fb47
>2a875380-3ec9-45cf-9a76-3fdd36ae533e
>_rev_16520f34-53f1-48e0-911e-33d0861f0ea6
>_rev_2769767f-603e-45b3-b272-2d8a6157be44
>_rev_6b7839fd-984-4ab-957b-50444b3b833
>chr11_rev
```

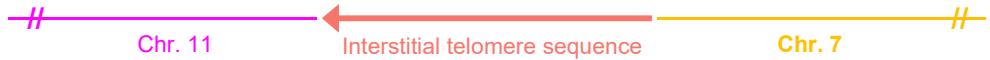

## D Subtelomere 15L

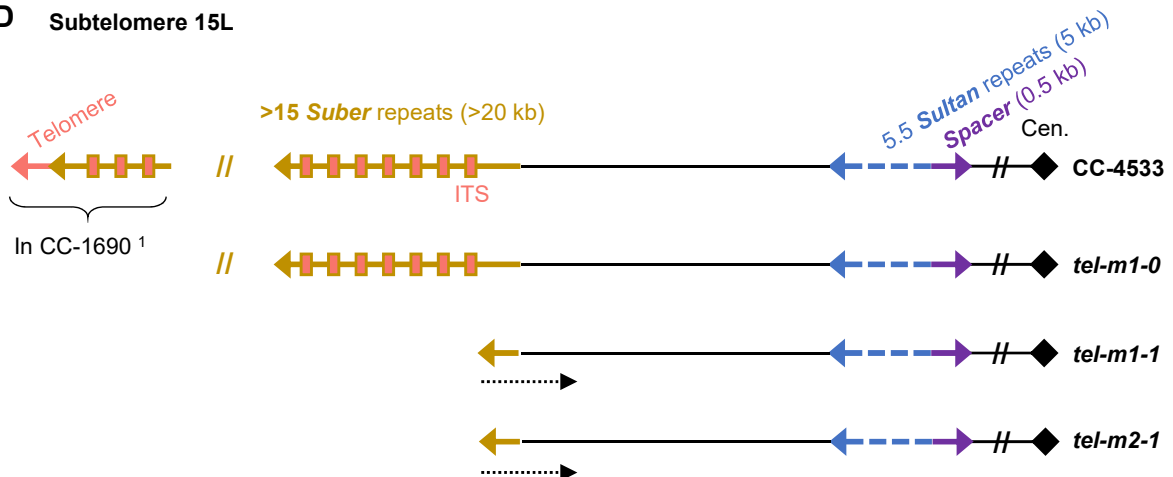

1

2 Supplemental Figure S5. Some *Sultan* and *Suber* arrays shorten progressively until complete

3 degradation. (A) Schematic representation of subtelomere 7L in CC-4533, *tel-m1-0* and *tel-m1-1*,

4 showing a decrease in the number of *Sultans* in *tel-m1-0* compared to CC-4533 and a total loss of all

5 *Sultans* and the *Spacer* sequence in *tel-m1-1*, with the formation of a new telomere and even the

1 additional translocation of a sequence from Chromosome 11 in a subpopulation. (B) Telomere length  
2 distribution of the terminal telomere in subpopulation 1 and of the ITS in subpopulation 2, as defined  
3 in (A). (C) Chromosome 7 to telomere junction in subpopulation 1 of reads and Chromosome 7 to ITS  
4 to Chromosome 11 junctions in subpopulation 2 of reads, as defined in (A). The last junction involves  
5 a microhomology of 4 bp (highlighted in yellow). (D) Schematic representation of class C subtelomere  
6 15L displaying a structure containing *Suber* elements in *tel-m1-0* similar to CC-4533, which presumably  
7 ends with telomeres as shown for CC-1690 (Chaux-Jukic et al. 2021), but with only one partial *Suber*  
8 remaining in *tel-m1-1* and *tel-m2-1*, suggesting a progressive loss of *Suber* elements.

9

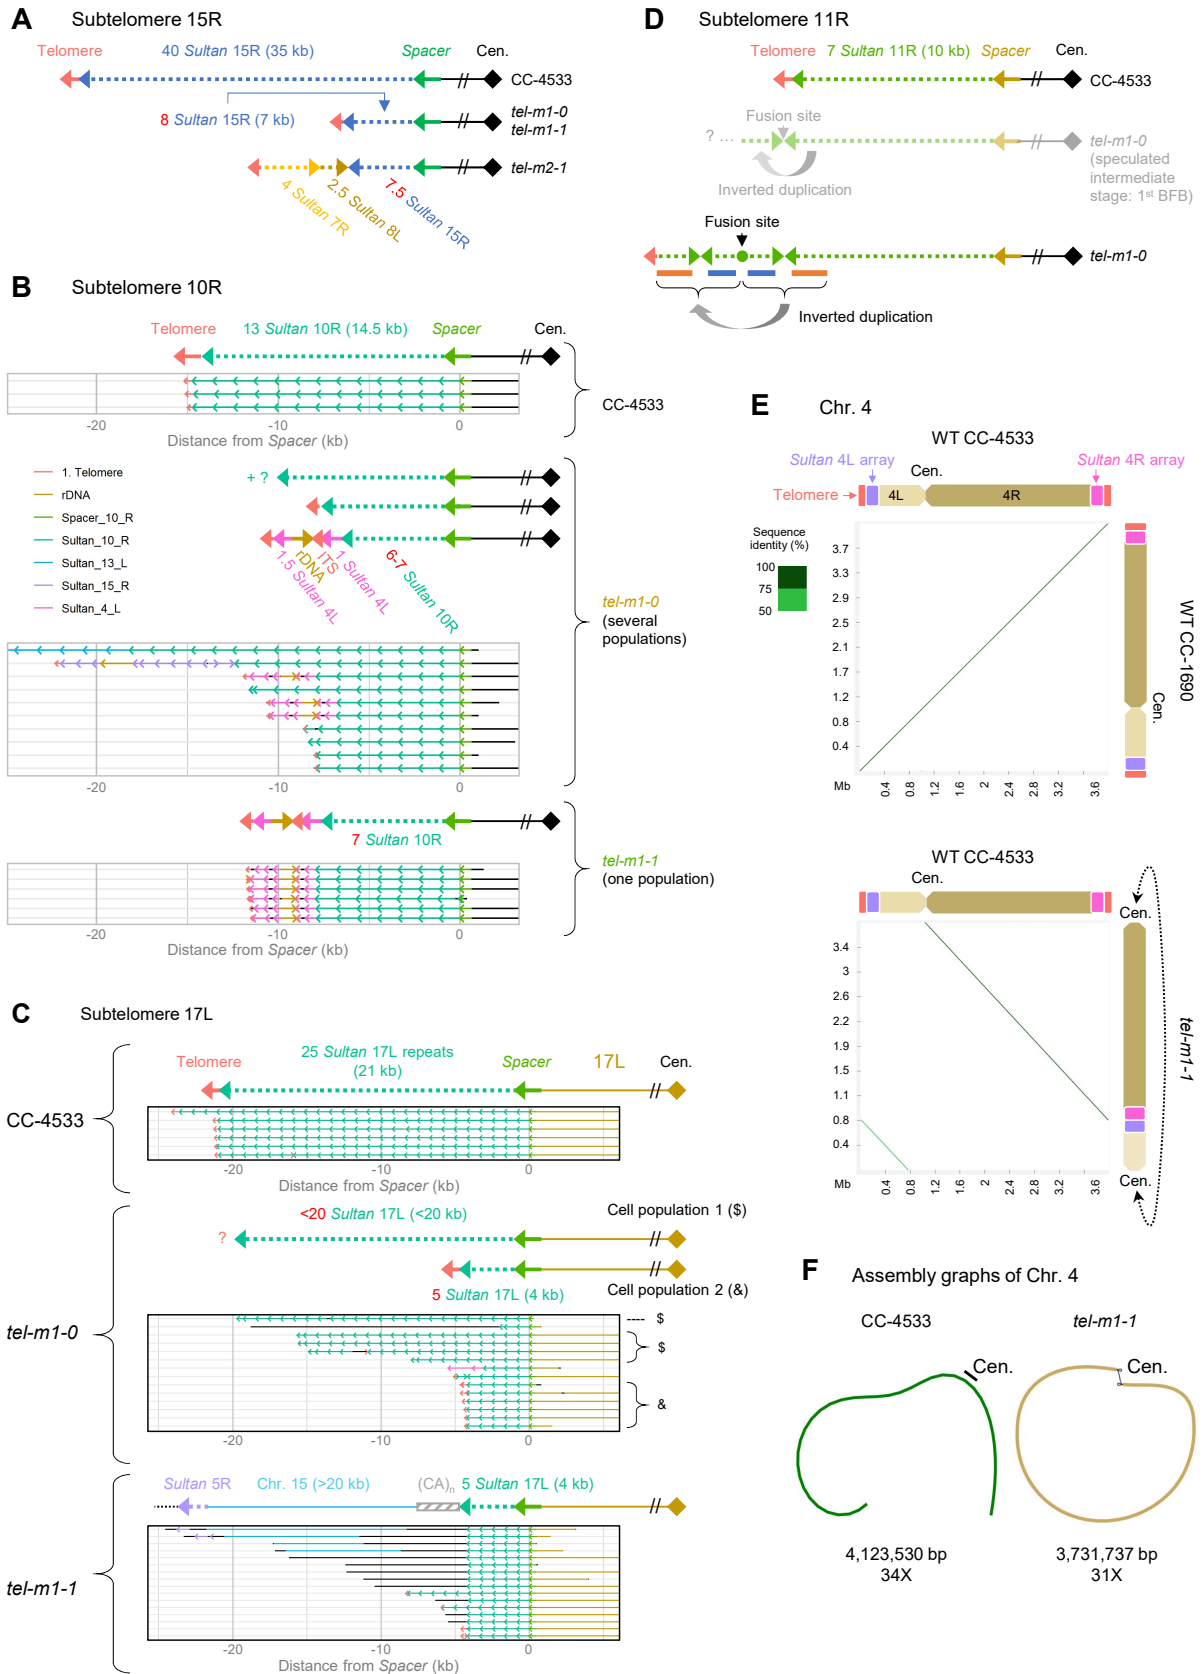

**Supplemental Figure S6. Complex multistep rearrangements at chromosome extremities.** (A) Schematic representation of subtelomere 15R in CC-4533, *tel-m1-0*, *tel-m1-1* and *tel-m2-1*. (B)

1 Schematic representation of subtelomere 10R and reads supporting the depicted structures. Several  
2 subpopulations are present in *tel-m1-0* and after purifying selection, *tel-m1-1* only comprises one  
3 subpopulation. (C) Schematic representation of the dynamics of rearrangements at subtelomere 17L between  
4 CC-4533, *tel-m1-0* and *tel-m1-1*. The structure of the subtelomere in *tel-m1-1* appeared to have evolved from  
5 the structure in cell population 2 of *tel-m1-0*. (D) Schematic representation of subtelomere 11R in *tel-m1-*  
6 *0* compared to CC-4533. Signature of BFB with multiple inverted repeats suggests at least 2 cycles of  
7 BFB. The speculated intermediate stage is shown in shaded colors. (E) Dot plot representation of the  
8 alignment of Chromosome 4 between CC-1690 and CC-4533 and CC-1690 and *tel-m1-1*. The  
9 extremities of Chromosome 4 of CC-4533 are no longer present in *tel-m1-1*. (F) Graph representation  
10 of Chromosome 4 of CC-4533 (linear) and *tel-m1-1* (circular topology).

11

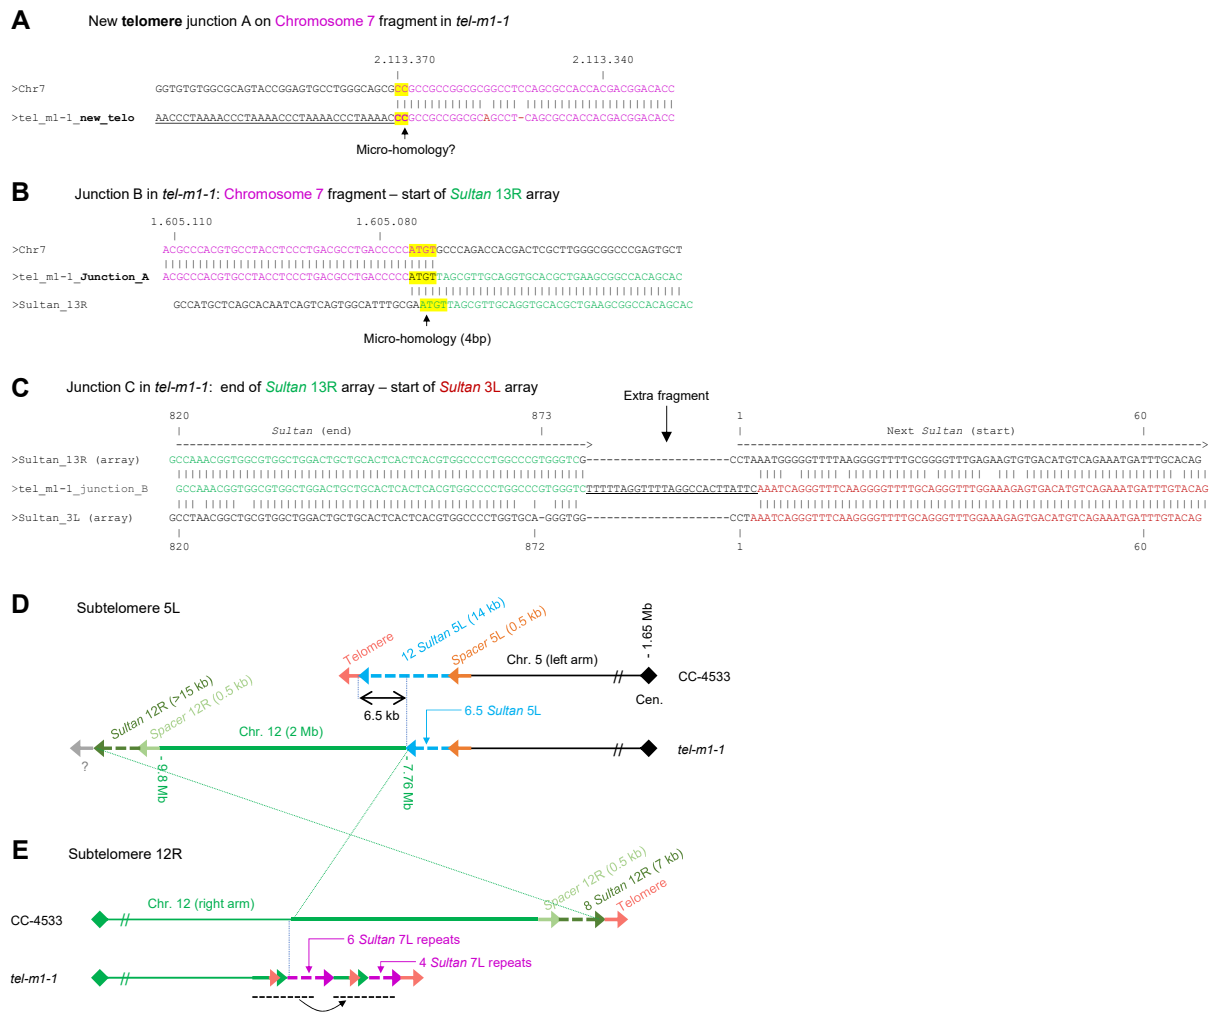

**Supplemental Figure S7. New telomere-capped extremities and junction sequences.** (A) Sequence of junction A as marked in Fig. 5B, showing a 2-bp microhomology highlighted in yellow. (B) Sequence of junction B as marked in Fig. 5B, with a 4-bp microhomology. (C) Sequence of junction C as marked in Fig. 5B, with the insertion of a short extra fragment between *Sultan* 13R array and *Sultan* 3L array. (D-E) Schematic representation of subtelomere 5L and 12R in CC-4533 and *tel-m1-1*. Subtelomere 12R was translocated to subtelomere 5L on a short array of *Sultan* elements. The new 12R extremity was formed by a tandem duplication of 9 telomeric repeats, a fragment of Chromosome 12 and *Sultan* elements from subtelomere 7, followed by a terminal telomere sequence.

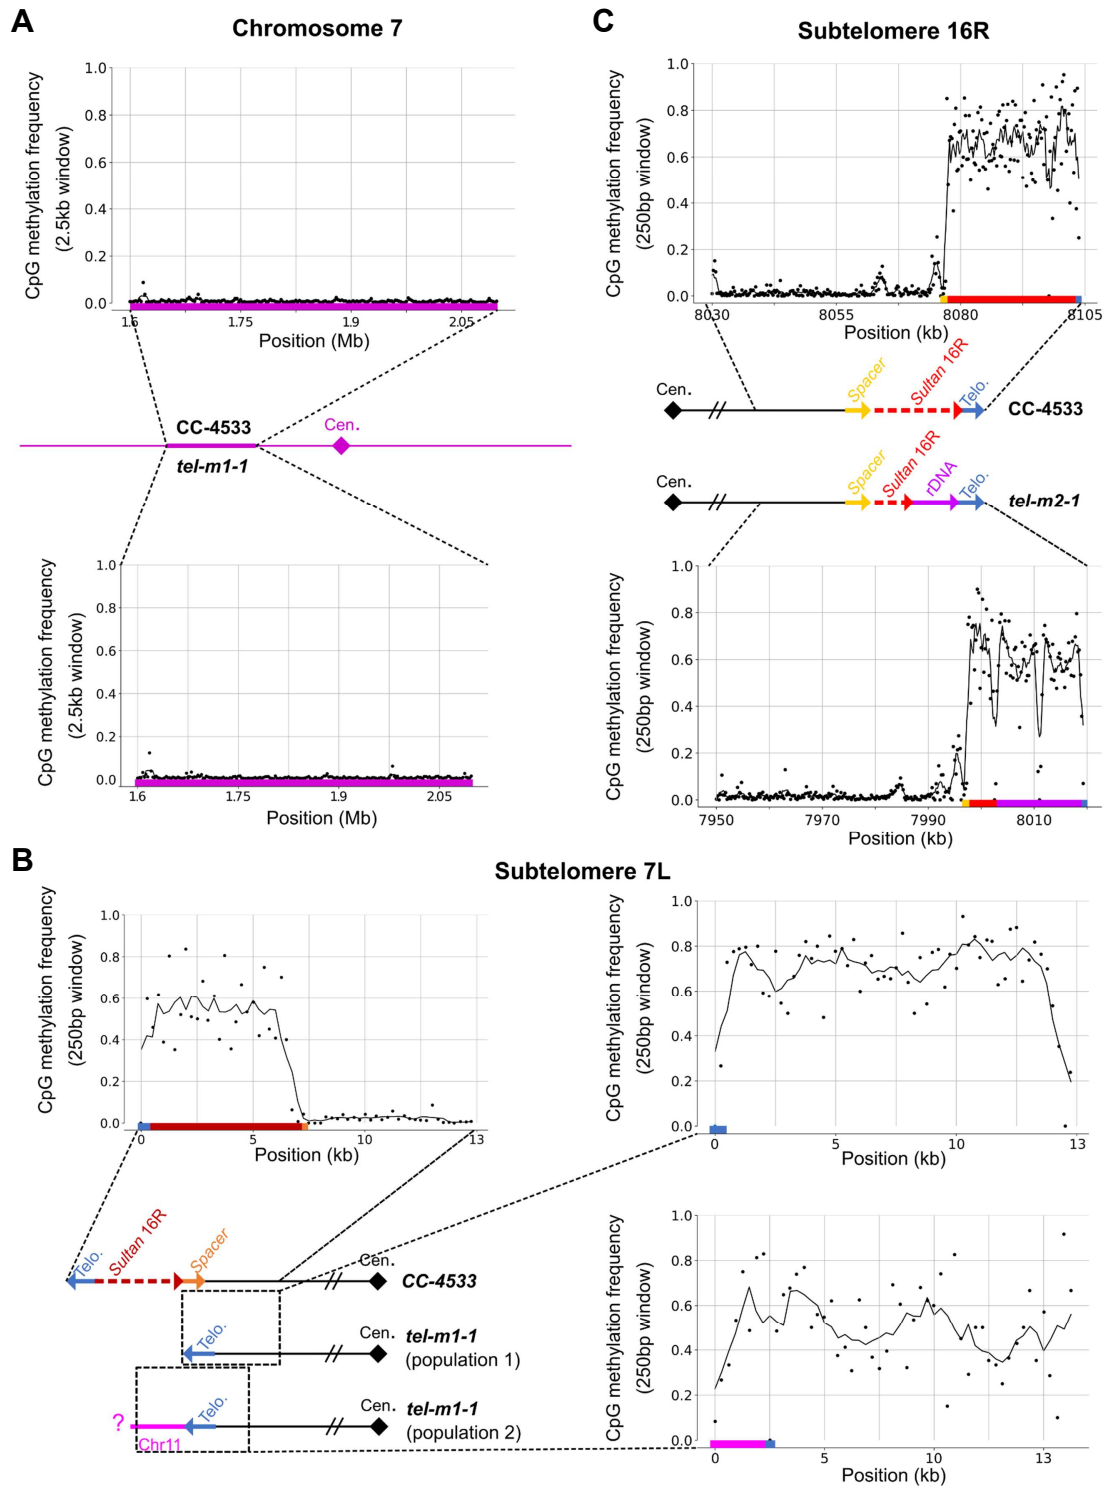

**Supplemental Figure S8. Methylation frequency of other chromosome regions and extremities.** (A-C) Analysis of 5mC frequency at CpG sites using reads that unambiguously spanned the indicated regions, in different illustrative cases. (A) At the original region of Chromosome 7 that was duplicated in *tel-m1-1*, shown here for CC-4533 and *tel-m1-1*. (B) At the new 7L extremity of *tel-m1-1* where

methylation spreads further towards the interior of the genome in both subpopulations compared to CC-4533 where the hypermethylated domain stops at the *Spacer* sequence. (C) At subtelomere 16R where in *tel-m2-1*, the structure shows a shorter hypermethylated *Sultan* array and a hypermethylated rDNA sequence capped by a telomere, compared to CC-4533 where only the hypermethylated *Sultan* array is present.

**Supplemental Dataset 1. *Spacer*-based analysis of subtelomeres.** All *Spacer*-containing reads anchored at the *Spacer* element are depicted for each subtelomere for CC-4533, *tel-m1-0*, *tel-m1-1* and *tel-m2-1*. The queried elements are displayed in color. The identifier for each read ("Read\_id") is also shown, to facilitate retrieval from the sequencing data.

**Supplemental Code. Code and associated files for TeloReader.** TeloReader is also available at Github: [https://github.com/Telomere-Genome-Stability/Telomere\\_2023/tree/main/TELOREADER](https://github.com/Telomere-Genome-Stability/Telomere_2023/tree/main/TELOREADER)
